# Supplementary material for: Sequencing of the Hepatitis C Virus: A Systematic Review
Source: PLoS One. 2013 Jun 27;8(6):e67073. doi: 10.1371/journal.pone.0067073 (PMC3694929; doi:10.1371/journal.pone.0067073)
Supplement: Table S1 — Database of HCV sequencing amplicons. Including author list, title, date of publication, and journal of accepted publications, selected primer sequence (where available) and 5′- and 3′-location of primers. (XLSX) [file pone.0067073.s001.xlsx]

## Sheet: Sheet1
Reference	Authors	Title	Year	Source title	Volume	Issue	Page start	Link	PubMed ID	Referenced method	Study group	Forward primer 1	Forward primer 5' location	Forward primer 3' location	Forward primer mid point	Forward primer Qui score	Reverse primer 1	Reverse primer 5' location	Reverse primer 3' location	Reverse primer mid point	Reverse primer Qui score	Amplicon length
Ref001	Abdel-Hamid M., El-Daly M., Molnegren V., El-Kafrawy S., Abdel-Latif S., Esmat G., Strickland G.T., Loffredo C., Albert J., Widell A.	Genetic diversity in hepatitis C virus in Egypt and possible association with hepatocellular carcinoma	2007	Journal of General Virology	88	5	1526	http://www.scopus.com/inward/record.url?eid=2-s2.0-34248220080&partnerID=40&md5=a731b50a9e474e7fd85daf3710adfda7	17412982	New primers plus modified [Ref355]	Epidemiology	TAGATTGGGTGTGCGCGCGA	467	486	477	1.92208	AGGTTCCCTGTTGCATAATT	828	847	838	1.452	381
Ref001	Abdel-Hamid M., El-Daly M., Molnegren V., El-Kafrawy S., Abdel-Latif S., Esmat G., Strickland G.T., Loffredo C., Albert J., Widell A.	Genetic diversity in hepatitis C virus in Egypt and possible association with hepatocellular carcinoma	2007	Journal of General Virology	88	5	1526	http://www.scopus.com/inward/record.url?eid=2-s2.0-34248220080&partnerID=40&md5=a731b50a9e474e7fd85daf3710adfda7	17412982	New primers plus modified [Ref355]	Epidemiology	TATGACACCCGCTGCTTTGAC	8256	8276	8267	1.8292	CCTGGTCATAGCCTCCGTGAA	8616	8636	8627	1.5832	381
Ref002	Abe H., Ochi H., Maekawa T., Hayes C.N., Tsuge M., Miki D., Mitsui F., Hiraga N., Imamura M., Takahashi S., Ohishi W., Arihiro K., Kubo M., Nakamura Y., Chayama K.	Common variation of IL28 affects gamma-GTP levels and inflammation of the liver in chronically infected hepatitis C virus patients	2010	Journal of Hepatology	53	3	439	http://www.scopus.com/inward/record.url?eid=2-s2.0-77955852095&partnerID=40&md5=82ca59a605390b253c88ed4de760a02f	20576307		Treatment response/resistance	GCTAGCCGAGTAGTGTT	249	265	258	1.9424	GGAGCAGTCCTTCGTGACATG	945	965	956	1.5412	717
Ref002	Abe H., Ochi H., Maekawa T., Hayes C.N., Tsuge M., Miki D., Mitsui F., Hiraga N., Imamura M., Takahashi S., Ohishi W., Arihiro K., Kubo M., Nakamura Y., Chayama K.	Common variation of IL28 affects gamma-GTP levels and inflammation of the liver in chronically infected hepatitis C virus patients	2010	Journal of Hepatology	53	3	439	http://www.scopus.com/inward/record.url?eid=2-s2.0-77955852095&partnerID=40&md5=82ca59a605390b253c88ed4de760a02f	20576307		Treatment response/resistance	GGGTCACAGCTCCCATGTGAGCC	6810	6832	6822	1.4824	GAGGGTTGTAATCCGGGCGTGC	7206	7227	7217	1.754	418
Ref003	Abid K., Quadri R., Veuthey A.-L., Hadengue A., Negro F.	A novel hepatitis C virus (HCV) subtype from Somalia and its classification into HCV clade 3	2000	Journal of General Virology	81	6	1485	http://www.scopus.com/inward/record.url?eid=2-s2.0-0034117014&partnerID=40&md5=8fa7410e91bdb2e0b5b3ccdb4bbb6cc2	10811932		Genotyping/classification	GGGTGCTTGCGAGTGCCCCGGGAGGTCTCGTAGACCGTG	299	337	319	1.8912	ACAGTCGTTGGTAACGGCGTAGAGGCCGGAGGTGTTCCG	924	962	944	1.5512	664
Ref003	Abid K., Quadri R., Veuthey A.-L., Hadengue A., Negro F.	A novel hepatitis C virus (HCV) subtype from Somalia and its classification into HCV clade 3	2000	Journal of General Virology	81	6	1485	http://www.scopus.com/inward/record.url?eid=2-s2.0-0034117014&partnerID=40&md5=8fa7410e91bdb2e0b5b3ccdb4bbb6cc2	10811932		Genotyping/classification	AAGACGGGATAAATTTCGCAACAGGGAACTTGCCCGGTTG	817	856	837	1.4552	AGTTCAGGGCAGTACTGTTGATGTGCCACGAGCCATTGGT	1587	1626	1607	1.5224	810
Ref003	Abid K., Quadri R., Veuthey A.-L., Hadengue A., Negro F.	A novel hepatitis C virus (HCV) subtype from Somalia and its classification into HCV clade 3	2000	Journal of General Virology	81	6	1485	http://www.scopus.com/inward/record.url?eid=2-s2.0-0034117014&partnerID=40&md5=8fa7410e91bdb2e0b5b3ccdb4bbb6cc2	10811932		Genotyping/classification	ATGGGGTTCTCGTATGATACCCGCTGCTTTGACTC	8244	8278	8262	1.8	GCTCTCAGGTTCCGCTCGTCCTCC	8591	8614	8603	1.7288	371
Ref004	Ahmad N., Schiff G.M., Baroudy B.M.	Detection of viremia by a one step polymerase chain reaction method in hepatitis C virus infection	1993	Virus Research	30	3	303	http://www.scopus.com/inward/record.url?eid=2-s2.0-0027437825&partnerID=40&md5=28b2bf10f5a855233ef70e4450dcc5cd	8109162		Treatment response/resistance	CCATAGTGGTCTGCGGAACCGGTGAGTACA	138	167	153	1.954	CCCAACACTACTCGGCTA	251	268	260	1.9404	131
Ref005	Aitken C.K., McCaw R.F., Bowden D.S., Tracy S.L., Kelsall J.G., Higgs P.G., Kerger M.J., Nguyen H., Crofts J.N.	Molecular epidemiology of hepatitis C virus in a social network of injection drug users	2004	Journal of Infectious Diseases	190	9	1586	http://www.scopus.com/inward/record.url?eid=2-s2.0-6944219957&partnerID=40&md5=f6e1f653e7fe3210cec2d67cf69470f9	15478062	[Ref408]	Clustering/transmission	TAG GGT GCT TGC GAG TGC CCC G	300	318	310	1.924	AGG GTA TCG ATG ACC TTA C	700	715	708	1.476	416
Ref006	Aiyama T., Yoshioka K., Okumura A., Takayanagi M., Iwata K., Ishikawa T., Kakumu S.	Hypervariable region sequence in cryoglobulin-associated hepatitis C virus in sera of patients with chronic hepatitis C: Relationship to antibody response against hypervariable region genome	1996	Hepatology	24	6	1346	http://www.scopus.com/inward/record.url?eid=2-s2.0-0029860266&partnerID=40&md5=74e877bc23e64e691d8bb5c8afc9ecc4	8938159		Natural history	ATTGGAATTCTGCTCTTTGCCGGCGTTGACGG	1458	1489	1474	1.7452	GCCAGAGCTCTTTATAAGCTGGATTTTCTG	1566	1595	1581	1.21	138
Ref007	Aiyama T., Yoshioka K., Okumura A., Takayanagi M., Iwata K., Ishikawa T., Kakumu S.	Sequence analysis of hypervariable region of hepatitis C virus (HCV) associated with immune complex in patients with chronic HCV infection	1996	Journal of Infectious Diseases	174	6	1316	http://www.scopus.com/inward/record.url?eid=2-s2.0-0029829717&partnerID=40&md5=6545d5296b107854b827d4207fab8723	8940224		Natural history	ATTGGAATTCTGCTCTTTGCCGGCGTTGACGG	1458	1489	1474	1.7452	GCCAGAGCTCTTTATAAGCTGGATTTTCTG	1566	1595	1581	1.21	138
Ref008	Aizaki H., Saito A., Kusakawa I., Ashiwara Y., Nagamori S., Toda G., Suzuki T., Ishii K., Matsuura Y., Miyamura T.	Mother-to-child transmission of a hepatitis C virus variant with an insertional mutation in its hypervariable region	1996	Journal of Hepatology	25	5	608	http://www.scopus.com/inward/record.url?eid=2-s2.0-0030297386&partnerID=40&md5=403b10dc02fe653970137ee1575cfff8	8938534	[Ref416]	Clustering/transmission	GCAATTTGGGTAAGGTCATCGATACCCTTACG	691	722	707	1.4712	AGCCGGTGTTGAGGCTATCATTGCAGTTC	1622	1650	1637	1.876	960
Ref009	Akkarathamrongsin S., Praianantathavorn K., Hacharoen N., Theamboonlers A., Tangkijvanich P., Tanaka Y., Mizokami M., Poovorawan Y.	Geographic distribution of hepatitis C virus genotype 6 subtypes in Thailand	2010	Journal of Medical Virology	82	2	257	http://www.scopus.com/inward/record.url?eid=2-s2.0-74549117134&partnerID=40&md5=67c6c8d533e055ba51c3b9396eeb7a01	20029811	new primers plus [Ref403]	Epidemiology	AGGTCTCGTAGACCGTGCATCATG	321	344	333	1.9112	CACGTAAGGGTATCGATGAC	705	724	715	1.5424	404
Ref009	Akkarathamrongsin S., Praianantathavorn K., Hacharoen N., Theamboonlers A., Tangkijvanich P., Tanaka Y., Mizokami M., Poovorawan Y.	Geographic distribution of hepatitis C virus genotype 6 subtypes in Thailand	2010	Journal of Medical Virology	82	2	257	http://www.scopus.com/inward/record.url?eid=2-s2.0-74549117134&partnerID=40&md5=67c6c8d533e055ba51c3b9396eeb7a01	20029811	new primers plus [Ref403]	Epidemiology	GATGGGHHSBKCMTAYGGATTCC,	8259	8181	8221	1.8352	CATAGCNTCCGTGAANGCTC,	8611	8630	8621	1.6928	372
Ref010	Allander T., Gruber A., Naghavi M., Beyene A., Soderstrom T., Bjorkholm M., Grillner L., Persson M.A.A., Heptonstall J., Mottimer P.P.	Frequent patient-to-patient transmission of hepatitis C virus in a haematology ward	1995	Lancet	345	8950	603	http://www.scopus.com/inward/record.url?eid=2-s2.0-0029152519&partnerID=40&md5=4fc1ad5838c7c866750536635239bfbf	7898176	[Ref503]	Clustering/transmission	GGGACATGATGATCAACTGG	1300	1319	1310	1.7108	GBGAAGGAATTCACTGGGCCACA	1848	1870	1860	1.5648	571
Ref011	Almroth G., Ekermo B., Akerlind B., Mansson A.-S., Widell A.	Monitoring hepatitis C infection in a major Swedish nephrology unit and molecular resolution of a new case of nosocomial transmission	2010	Journal of Medical Virology	82	2	249	http://www.scopus.com/inward/record.url?eid=2-s2.0-74549117135&partnerID=40&md5=1757ebf403e4fff9dddc3b34a58dbb8a	20029812	[Ref226], [Ref1] and [Ref355]	Clustering/transmission	TATGACACCCGCTGCTTTGAC	8256	8276	8267	1.8292	CCTGGTCATAGCCTCCGTGAA	8616	8636	8627	1.5832	381
Ref012	Altuglu I., Soyler I., Ozacar T., Erensoy S.	Distribution of hepatitis C virus genotypes in patients with chronic hepatitis C infection in Western Turkey	2008	International Journal of Infectious Diseases	12	3	239	http://www.scopus.com/inward/record.url?eid=2-s2.0-42149141935&partnerID=40&md5=e03ecd63bdc94342f099f1a0c5841620	17942359	[Ref397]	Genotyping/classification	TTCACGCAGAAAGCGTCTAG	63	82	73	1.9576	CACTCTCGAGCACCCTATCAGGCAGT	288	313	301	1.9248	251
Ref013	Amini S., Ahmadi Pour M.-H., Azadmanesh K.	The phylogenetic analysis of hepatitis C virus isolates obtained from two Iranian carriers revealed evidence for a new subtype of HCV genotype 3	2006	Virus Genes	33	3	271	http://www.scopus.com/inward/record.url?eid=2-s2.0-33748967589&partnerID=40&md5=b3f8a539487a97e4717fa0da66001690	16990997	New primers, plus [Ref183]	Genotyping/classification	GTGGTCTGCGGAACCGG	143	159	152	1.9552	GGGCACTCGCAAGCACCC	299	316	308	1.9244	174
Ref013	Amini S., Ahmadi Pour M.-H., Azadmanesh K.	The phylogenetic analysis of hepatitis C virus isolates obtained from two Iranian carriers revealed evidence for a new subtype of HCV genotype 3	2006	Virus Genes	33	3	271	http://www.scopus.com/inward/record.url?eid=2-s2.0-33748967589&partnerID=40&md5=b3f8a539487a97e4717fa0da66001690	16990997	New primers, plus [Ref183]	Genotyping/classification	AGGTCTCGTAGACTGTGCA	321	339	331	1.916	CACGTAAGGGTATCGATGAC	705	724	715	1.5424	404
Ref013	Amini S., Ahmadi Pour M.-H., Azadmanesh K.	The phylogenetic analysis of hepatitis C virus isolates obtained from two Iranian carriers revealed evidence for a new subtype of HCV genotype 3	2006	Virus Genes	33	3	271	http://www.scopus.com/inward/record.url?eid=2-s2.0-33748967589&partnerID=40&md5=b3f8a539487a97e4717fa0da66001690	16990997	New primers, plus [Ref183]	Genotyping/classification	ATCTTCACGGAGGCTATGAC	8613	8632	8623	1.632	GGACCCCAAGTTTTCTGAG	9066	9084	9076	1.6292	472
Ref014	Amini S., Majd Abadi M.M.F., Alavian S.M., Jouiale M., Ahmadipour M.H.	Distribution of hepatitis C virus genotypes in Iran: A population-based study	2009	Hepatitis Monthly	9	2	95	http://www.scopus.com/inward/record.url?eid=2-s2.0-70349292688&partnerID=40&md5=5d988109a594efa0a116f371adfa664e		[Ref183]	Epidemiology	AGGTCTCGTAGACCGTGCA	321	339	331	1.916	CACGTTAGGGTATCGATGAC	705	724	715	1.5424	404
Ref015	Ansaldi F., Torre F., Bruzzone B.M., Picciotto A., Crovari P., Icardi G.	Evaluation of a new hepatitis C virus sequencing assay as a routine method for genotyping	2001	Journal of Medical Virology	63	1	17	http://www.scopus.com/inward/record.url?eid=2-s2.0-0035216824&partnerID=40&md5=6dda4afa722c2a27f77025735586b0af	11130882	[Ref449]	Genotyping/classification	GCAGAAAGCGTCTAGCCATGGCGT	68	91	80	1.9556	CTCGCAAGCACCCTATCAGGCAGT	288	311	300	1.926	244
Ref016	Antigoni K., Paraskevis D., Kalapothaki V., Arvanitis D., Karayiannis P., Hadjiconstantinou V., Hatzakis A., Hatzakis A., Katsoulidou A., Psichogiou M., Vaindirli E., Vosnidis G., Boletis J., Stamatiadis D., Voudiclari S., Priftis Ch., Koulousiou M., Moutafis S., Ifandi K., Thanou I., Skoutelis G., Triandafilou K., Matzaropoulou M., Hadjiconstantinou V., Arvanitis D., Logothetis E.	Molecular epidemiology of a hepatitis C virus outbreak in a haemodialysis unit	1999	Nephrology Dialysis Transplantation	14	5	1188	http://www.scopus.com/inward/record.url?eid=2-s2.0-0344004831&partnerID=40&md5=fa3f1d5258a15f3f2919d93880be41f4	10344360		Genotyping/classification	GATCCCGTATGATACCCGCTGCTTTGA	8245	8275	8261	1.7908	GGCGGAATTCCTGGTCATAGCCTCCGTGAA	8616	8645	8631	1.5956	401
Ref017	Apichartpiyakul C., Miyajima H., Doi H., Mizokami M., Homma M., Hotta H.	Frequent detection of hepatitis C virus subtype 3a (HCV-3a) isolates in Thailand by PCR using subtype-specific primers	1995	Microbiology and Immunology	39	4	285	http://www.scopus.com/inward/record.url?eid=2-s2.0-0028966565&partnerID=40&md5=9ed7d265e7c577de9ca8d5b09acb166b	7544428		Genotyping/classification	GAAGAGGAGATATACCAATG-	8307	8326	8317	1.8064	AGATCATCTCCGCAGACAAG	8541	8560	8551	1.6676	254
Ref018	Argentini C., Dettori S., Loiacono L., Guadagnino V., Stroffolini T., Rapicetta M.	Molecular characterization of HCV 1b intra-familiar infection through three generations	1999	Virus Genes	18	2	169	http://www.scopus.com/inward/record.url?eid=2-s2.0-0013673439&partnerID=40&md5=7c59af27f6f76626e10b8d6126f1e6f3	10403703		Genotyping/classification		918	937	928	1.3164		1352	1371	1362	1.6148	454
Ref019	Barnes E., Harcourt G., Brown D., Lucas M., Phillips R., Dusheiko G., Klenerman P.	The dynamics of T-lymphocyte responses during combination therapy for chronic hepatitis C virus infection	2002	Hepatology	36	3	743	http://www.scopus.com/inward/record.url?eid=2-s2.0-0036727325&partnerID=40&md5=485cef66671b47ff53802123c9deaade	12198669		Natural history	CCTTGTGGTACTGCCTGATAG	279	299	290	1.958	GTCMKCKGCCTCATACACAAT (or TTGGCCCCTCTATGGTAACG)	975	995	986	1.7448	717
Ref020	Bartolome J., Lopez-Alcorocho J.M., Castillo I., Rodriguez-Inigo E., Quiroga J.A., Palacios R., Carreno V.	Ultracentrifugation of serum samples allows detection of hepatitis C virus RNA in patients with occult hepatitis C	2007	Journal of Virology	81	14	7710	http://www.scopus.com/inward/record.url?eid=2-s2.0-34447265738&partnerID=40&md5=1150b0d524ab0ccf41823813921152ef	17475654	[Ref499]	Genotyping/classification	TSYTGCCGCGCAGGGGC	448	464	457	1.8964	GTACCCCATGAGRTCGGC	732	749	741	1.592	302
Ref021	Beld M., Penning M., Van Putten M., Van Den Hoek A., Damen M., Klein M.R., Goudsmit J.	Low levels of hepatitis C virus RNA in serum, plasma, and peripheral blood mononuclear cells of injecting drug users during long antibody- undetectable periods before seroconversion	1999	Blood	94	4	1183	http://www.scopus.com/inward/record.url?eid=2-s2.0-0033567053&partnerID=40&md5=d1a658406bceabf021c022521fba583d	10438705	[Ref502]	Natural history	AGCGCCTAGCCATGGCGT	74	91	83	1.9496	TACCACAAGGCCTTTCGC	271	288	280	1.9456	215
Ref022	Beltrami E., Kozak A., Williams I.T., Saekhou A.M., Kalish M.L., Nainan O.V., Stramer S.L., Fucci M.-C.H., Frederickson D., Cardo D.M.	Transmission of HIV and hepatitis C virus from a nursing home patient to a health care worker	2003	American Journal of Infection Control	31	3	168	http://www.scopus.com/inward/record.url?eid=2-s2.0-10744222004&partnerID=40&md5=7b2a493882b76846f1bd8e49ff1306ae	12734523	New primers, plus [Ref404] [Ref395] [Ref79]	Clustering/transmission	TATTCCATGGTGGGGAACTGG-	1425	1445	1436	1.8068	GCAGTCCTGTTGATGTGCCA	1599	1618	1609	1.52	194
Ref022	Beltrami E., Kozak A., Williams I.T., Saekhou A.M., Kalish M.L., Nainan O.V., Stramer S.L., Fucci M.-C.H., Frederickson D., Cardo D.M.	Transmission of HIV and hepatitis C virus from a nursing home patient to a health care worker	2003	American Journal of Infection Control	31	3	168	http://www.scopus.com/inward/record.url?eid=2-s2.0-10744222004&partnerID=40&md5=7b2a493882b76846f1bd8e49ff1306ae	12734523	New primers, plus [Ref404] [Ref395] [Ref79]	Clustering/transmission	TGGGGATCCCGTATGATACCCGCTGCTTTGA	8245	8275	8261	1.7908	GGCGGAATTCCTGGTCATAGCCTCCGTGAA	8616	8645	8631	1.5956	401
Ref023	Bernardin F., Herring B., Page-Shafer K., Kuiken C., Delwart E.	Absence of HCV viral recombination following superinfection	2006	Journal of Viral Hepatitis	13	8	532	http://www.scopus.com/inward/record.url?eid=2-s2.0-33746218613&partnerID=40&md5=872cfdcab114664d77209c9a3df8447e	16901283		Genotyping/classification	TCGCCGACCTCATGGGGTAC	730	749	740	1.5912	AGAGTAACTGTGGAGCGTGAACGCG	9011	9035	9024	1.7904	8306
Ref024	Bianchettin G., Bonaccini C., Oliva R., Tramontano A., Cividini A., Casato M., Merlini G., Silini E., Mondelli M.U.	Analysis of hepatitis C virus hypervariable region 1 sequence from cryoglobulinemia patients and associated controls	2007	Journal of Virology	81	9	4564	http://www.scopus.com/inward/record.url?eid=2-s2.0-34247592813&partnerID=40&md5=7e0856b40d67d97ffd9082c438c6abb1	17314160	[Ref029]	Evolution	ATGGTGGGGAACTGGGCGAAGG	1431	1452	1442	1.8128	GGGGCTGGGAGTGAAGCA	1863	1880	1872	1.5632	450
Ref025	Biasin M.R., Fiordalisi G., Zanella I., Cavicchini A., Marchelle G., Infantolino D.	A DNA hybridization method for typing hepatitis C virus genotype 2c	1997	Journal of Virological Methods	65	2	307	http://www.scopus.com/inward/record.url?eid=2-s2.0-0030909666&partnerID=40&md5=0e37e923495f678eb77e29d89503fb72	9186955	[Ref501]	Genotyping/classification	ATGGCGTTAGTATGAGTG	85	102	94	1.9408	GCGACCCAACACTACTCGGCT	252	272	263	1.9388	188
Ref026	Bittar C., Jardim A.C.G., Yamasaki L.H.T., de Queiroz A.T.L., Carareto C.M.A., Pinho J.R.R., de Carvalho-Mello I.M.V., Rahal P.	Genetic diversity of NS5A protein from hepatitis C virus genotype 3a and its relationship to therapy response	2009	BMC Infectious Diseases	10			http://www.scopus.com/inward/record.url?eid=2-s2.0-77649278552&partnerID=40&md5=43ff0926939d7ae7ce77d889a5995ca8	20178583		Treatment response/resistance	TGGCTGCGTATCATCTGGGA	6267	8286	7277	1.65	GTGGACCAAGAGTCGCAACT	7542	7561	7552	1.3412	1295
Ref027	Blackard J.T., Hiasa Y., Smeaton L., Jamieson D.J., Rodriguez I., Mayer K.H., Chung R.T.	Compartmentalization of Hepatitis C Virus (HCV) during HCV/HIV coinfection	2007	Journal of Infectious Diseases	195	12	1765	http://www.scopus.com/inward/record.url?eid=2-s2.0-34249910052&partnerID=40&md5=fd4e03849e37addc5b7a195307ec0bda	17492592		Natural history	GGCATGGGATATGATGATGAACTGGTCCCCTAC	1295	1327	1312	1.7488	AGTTCAAGGCCGTGCTATTGATGTGCCAACTGCCGTTGGT	1587	1626	1607	1.5224	332
Ref027	Blackard J.T., Hiasa Y., Smeaton L., Jamieson D.J., Rodriguez I., Mayer K.H., Chung R.T.	Compartmentalization of Hepatitis C Virus (HCV) during HCV/HIV coinfection	2007	Journal of Infectious Diseases	195	12	1765	http://www.scopus.com/inward/record.url?eid=2-s2.0-34249910052&partnerID=40&md5=fd4e03849e37addc5b7a195307ec0bda	17492592		Evolution	ATGGGGCAAAGGACGTCCG	7909	7927	7919	1.8124	TACCTAGTCATAGCCTCCGTGAAG	8615	8638	8627	1.5832	730
Ref029	Booth J.C.L., Kumar U., Webster D., Monjardino J., Thomas H.C.	Comparison of the rate of sequence variation in the hypervariable region of E2/NS1 region of hepatitis C virus in normal and hypogammaglobulinemic patients	1998	Hepatology	27	1	223	http://www.scopus.com/inward/record.url?eid=2-s2.0-0031982502&partnerID=40&md5=001141223f4e7c97f9fbfa9527aedbea	9425941		Evolution	ATGGTGGGGAACTGGGCGAAGG	1431	1452	1442	1.8128	GGGGCTGGGAGTGAAGCA	1863	1880	1872	1.5632	450
Ref030	Bowden S., McCaw R., White P.A., Crofts N., Aitken C.K.	Detection of multiple hepatitis C virus genotypes in a cohort of injecting drug users	2005	Journal of Viral Hepatitis	12	3	322	http://www.scopus.com/inward/record.url?eid=2-s2.0-18344362819&partnerID=40&md5=a5c79481209c8f194287f366bf0de733	15850474	[Ref408]	Genotyping/classification	TAG GGT GCT TGC GAG TGC CCC G	300	318	310	1.924	AGG GTA TCG ATG ACC TTA C	700	715	708	1.476	416
Ref031	Buckton A.J., Ngui S.-L., Arnold C., Boast K., Kovacs J., Klapper P.E., Patel B., Ibrahim I., Rangarajan S., Ramsay M.E., Teo C.-G.	Multitypic hepatitis C virus infection identified by real-time nucleotide sequencing of minority genotypes	2006	Journal of Clinical Microbiology	44	8	2779	http://www.scopus.com/inward/record.url?eid=2-s2.0-33747151406&partnerID=40&md5=408a04b45bd7953f93faa9f6fd73e289	16891492		Genotyping/classification	GTGGTCTGCGGAACCGG	143	159	152	1.9552	GGGCACTCGCAAGCACCC	299	316	308	1.9244	174
Ref033	Bukh J., Purcell R.H., Miller R.H.	Sequence analysis of the 5' noncoding region of hepatitis C virus	1992	Proceedings of the National Academy of Sciences of the United States of America	89	11	4942	http://www.scopus.com/inward/record.url?eid=2-s2.0-0026728652&partnerID=40&md5=cd16443f161ae08c401d77cf41aaab7d	1317578	[Ref032]	Genotyping/classification	CCATGGATCCCTCCCCTGTGAGGAACTACT	30	59	45	1.8668	CTTGGGATCCTGTGGGCGACGGTTGGTGTT	381	410	396	1.9328	381
Ref033	Bukh J., Purcell R.H., Miller R.H.	Sequence analysis of the 5' noncoding region of hepatitis C virus	1992	Proceedings of the National Academy of Sciences of the United States of America	89	11	4942	http://www.scopus.com/inward/record.url?eid=2-s2.0-0026728652&partnerID=40&md5=cd16443f161ae08c401d77cf41aaab7d	1317578	[Ref032]	Genotyping/classification	ACGCAGAAAGCGTCTAGCCATGGCGTTAGT	66	95	81	1.956	TCCCGGGGCACTCGCAAGCACCCTATCAGG	292	321	307	1.926	256
Ref034	Bukh J., Purcell R.H., Miller R.H.	Sequence analysis of the core gene of 14 hepatitis C virus genotypes	1994	Proceedings of the National Academy of Sciences of the United States of America	91	17	8239	http://www.scopus.com/inward/record.url?eid=2-s2.0-0028038280&partnerID=40&md5=b49fbe385403c245db2d1340f36fb418	8058787	[Ref032]	Genotyping/classification	AGGAATCCTGGTACTGCCTGATAGGGTGCT	276	305	291	1.9568	CAGCGAATCCAAGAGGGGCGCCGACGAGCG	754	783	769	1.4048	508
Ref035	Cai Q., Zhang X., Tian L., Yuan M., Jin G., Lu Z.	Variant analysis and immunogenicity prediction of envelope gene of HCV strains from China	2002	Journal of Medical Virology	67	4	490	http://www.scopus.com/inward/record.url?eid=2-s2.0-0036301054&partnerID=40&md5=3d036cfcbea7f74fb00dfdf86b66a87a	12115994		Natural history	CGGAATTCATGGCACATGGTGTCCGGGTT	784	812	799	1.278	CGGAATTCATCACAATCAAA(G)ACCTTAGCC	1445	1471	1459	1.7076	688
Ref035	Cai Q., Zhang X., Tian L., Yuan M., Jin G., Lu Z.	Variant analysis and immunogenicity prediction of envelope gene of HCV strains from China	2002	Journal of Medical Virology	67	4	490	http://www.scopus.com/inward/record.url?eid=2-s2.0-0036301054&partnerID=40&md5=3d036cfcbea7f74fb00dfdf86b66a87a	12115994		Natural history	CGGGATCCATGGGGAACTTACCCGGTTGCTC	824	859	842	1.454	CGGAATTCCGGTGCTTTTGATGTGCCA	1599	1629	1615	1.5996	806
Ref035	Cai Q., Zhang X., Tian L., Yuan M., Jin G., Lu Z.	Variant analysis and immunogenicity prediction of envelope gene of HCV strains from China	2002	Journal of Medical Virology	67	4	490	http://www.scopus.com/inward/record.url?eid=2-s2.0-0036301054&partnerID=40&md5=3d036cfcbea7f74fb00dfdf86b66a87a	12115994		Natural history	CGGGATCCTGGGATATGATATGATGATGAACTGGTC	1282	1321	1302	1.7564	CGGAATTCCAGCACGTCTGTCTCATTCTCC	1932	1953	1943	1.464	672
Ref036	Candotti D., Richetin A., Cant B., Temple J., Sims C., Reeves I., Barbara J.A.J., Allain J.-P.	Evaluation of a transcription-mediated amplification-based HCV and HIV-1 RNA duplex assay for screening individual blood donations: A comparison with a minipool testing system	2003	Transfusion	43	2	215	http://www.scopus.com/inward/record.url?eid=2-s2.0-0037322028&partnerID=40&md5=c34af50d631699bca0ad85c4e1b0dc8e	12559017	[Ref172]	Genotyping/classification	GGGAYATGATGATRAACTGG	1300	1319	1310	1.7108	CAGTAIACYGGRCCRCAYAC	1845	1864	1855	1.5712	565
Ref037	CarreÃ±o V, Pardo M, LÃ³pez-Alcorocho JM, RodrÃ­guez-IÃ±igo E, BartolomÃ© J, Castillo I.	Detection of hepatitis C virus (HCV) RNA in the liver of healthy, anti-HCV antibody-positive, serum HCV RNA-negative patients with normal alanine aminotransferase levels.	2006	J Infect Dis	194	1	53	/pubmed/16741882	16741882	[Ref499]	Genotyping/classification	TSYTGCCGCGCAGGGGC	448	464	457	1.8964	GTACCCCATGAGRTCGGC	732	749	741	1.592	302
Ref038	Castelain S., Khorsi H., Zawadzki P., Sueur J.-M., Capron J.-P., Eb F., Duverlie G.	Direct blotting electrophoresis for sequencing and genotyping hepatitis C virus	1997	Journal of Virological Methods	65	2	237	http://www.scopus.com/inward/record.url?eid=2-s2.0-0030960832&partnerID=40&md5=d30112bf3df21ef34243fe7a15ed5bf5	9186947		Genotyping/classification	GCAGAAAGCGTCTAGCCATGGCGT	68	91	80	1.9556	CTCGCAAGCACCCTATCAGGCAGT	288	311	300	1.926	244
Ref039	Castillo I., Bartolome J., Ruiz-Moreno M., Sanchez V., Navas S., Carreno V.	Hepatitis C virus genotypes in serum and liver of children with chronic hepatitis C	1995	Pediatric Research	38	4	618	http://www.scopus.com/inward/record.url?eid=2-s2.0-0029111658&partnerID=40&md5=f9516f395ec85a1052bfc98179e90b50	8559619	[Ref236]	Genotyping/classification	TAGATTGGGTGTGCGCGCGA	467	486	477	1.92208	AGGTTCCCTGTTGCATAATT	828	847	838	1.452	381
Ref040	Caudai C, Battiata M, Riccardi MP, Toti M, Bonazza P, Padula MG, Pianese M, Valensin PE.	Vertical transmission of the hepatitis C virus to infants of anti-human immunodeficiency virus-negative mothers: molecular evolution of hypervariable region 1 in prenatal and perinatal or postnatal infections.	2003	J Clin Microbiol	41	8	3955	/pubmed/12904428	12904428		Clustering/transmission	CCYGGTTGCTCYTTYTCTATCTT	849	871	861	1.3924	GGTGGGTAGTGCCAGCAATA	1794	1813	1804	1.4224	965
Ref041	Cerino A., Cividini A., Asti M., Lanza A., Silini E., Mondelli M.U.	Comparative evaluation of two serologic typing methods for hepatitis C virus	1996	Journal of Clinical Microbiology	34	3	714	http://www.scopus.com/inward/record.url?eid=2-s2.0-0030058616&partnerID=40&md5=490065d19d5d2b428c73c31f1b4238e5	8904443	[Ref498]	Genotyping/classification	TAGATTGGGTGTGCGCGCGA	467	486	477	1.92208	AGGTTCCCTGTTGCATAATT	828	847	838	1.452	381
Ref042	Cha T.-A., Kolberg J., Irvine B., Stempien M., Beall E., Yano M., Choo Q.-L., Houghton M., Kuo G., Han J.H., Urdea M.S.	Use of a signature nucleotide sequence of hepatitis C virus for detection of viral RNA in human serum and plasma	1991	Journal of Clinical Microbiology	29	11	2528	http://www.scopus.com/inward/record.url?eid=2-s2.0-0025952232&partnerID=40&md5=2841e0e2b6ef4e772cbf0e1b72d6bd26	1663510		Genotyping/classification	CCATGAATCACTCCCCTGTGAGGAACTA	30	57	44	1.8644	TTGCGGGGGCACGCCCAA	227	244	236	1.8712	215
Ref043	Chan D.P.C., Lee S.S., Lee K.C.K.	The effects of widespread methadone treatment on the molecular epidemiology of hepatitis C virus infection among injection drug users in Hong Kong	2011	Journal of Medical Virology	83	7	1187	http://www.scopus.com/inward/record.url?eid=2-s2.0-79955892012&partnerID=40&md5=76dafff01dc4a489c11ea742ddab9b93	21567422	[Ref496]	Clustering/transmission	TATGAYACCCGYTGCTTTGAC	8256	8276	8267	1.8292	GAATACCTGGTCATAGCCTCCG	8620	8641	8631	1.5956	386
Ref044	Chandra M., Thippavuzzula R., Ramachandra Rao V.V., Habib A.M., Habibullah C.M., Narasu L., Prameela Y., Khaja M.N.	Genotyping of Hepatitis C virus (HCV) in infected patients from South India	2007	Infection, Genetics and Evolution	7	6	724	http://www.scopus.com/inward/record.url?eid=2-s2.0-35548999791&partnerID=40&md5=836a31687d030f1f4f82fd428b48973d	17540621	[Ref495]	Epidemiology	ACTGCTAGCCGACTAGTGTTGGGT	246	269	258	1.9424	AGGTTGCGACCGCTCGGAAGTCTT	492	515	504	1.882	270
Ref045	Chayama K., Kobayashi M., Tsubota A., Koida I., Arase Y., Saitoh S., Ikeda K., Kumada H.	Molecular analysis of intraspousal transmission of hepatitis C virus	1995	Journal of Hepatology	22	4	431	http://www.scopus.com/inward/record.url?eid=2-s2.0-0028938113&partnerID=40&md5=aacb03a4d4c09b1d73703891b0fe9c4d	7665861		Clustering/transmission	CTCGAATTCGGCTTCGCCGATCTCATGG	717	744	731	1.6256	GCTTGTGGGATCCGGAGTA	1351	1369	1361	1.6104	653
Ref046	Chayama K., Tsubota A., Arase Y., Saitoh S., Ikeda K., Matsumoto T., Hashimoto M., Kobayashi M., Kanda M., Morinaga T., Kumada H.	Genotype, slow decrease in virus titer during interferon treatment and high degree of sequence variability of hypervariable region are indicative of poor response to interferon treatment in patients with chronic hepatitis type C	1995	Journal of Hepatology	23	6	648	http://www.scopus.com/inward/record.url?eid=2-s2.0-9044246268&partnerID=40&md5=a7c3675a71e864aee1e4163fdc296ad6	8750162		Treatment response/resistance	CTTGGGATATGATGATGAACTGG	1297	1319	1309	1.7116	CTGTCTCATTCTCCCCCCAGCTATA	1920	1944	1933	1.4776	648
Ref047	Chayama K., Tsubota A., Arase Y., Saitoh S., Koida I., Ikeda K., Matsumoto T., Kobayashi M., Iwasaki S., Koyama S., Morinaga T., Kumada H.	Genotypic subtyping of hepatitis C virus	1993	Journal of Gastroenterology and Hepatology	8	2	150	http://www.scopus.com/inward/record.url?eid=2-s2.0-0027403340&partnerID=40&md5=bfd7cb495f50da0a8f4b2135b7408cba	8386022	[Ref079]	Genotyping/classification	TGGGGATCCCGTATGATACCCGCTGCTTTGA	8245	8275	8261	1.7908	GGCGGAATTCCTGGTCATAGCCTCCGTGAA	8616	8645	8631	1.5956	401
Ref048	Chen P.-J., Lin M.-H., Tu S.-J., Chen D.-S.	Isolation of a complementary DNA fragment of hepatitis C virus in Taiwan revealed significant sequence variations compared with other isolates	1991	Hepatology	14	1	73	http://www.scopus.com/inward/record.url?eid=2-s2.0-0025775860&partnerID=40&md5=9a6c76e917bd838260d64d349e4253e7	1648541		Genotyping/classification	ACAATACGTGTGTCAC	4702	4717	4710	1.6196	GCATGTCATGATGTAT	5270	5285	5278	1.76004	584
Ref048	Chen P.-J., Lin M.-H., Tu S.-J., Chen D.-S.	Isolation of a complementary DNA fragment of hepatitis C virus in Taiwan revealed significant sequence variations compared with other isolates	1991	Hepatology	14	1	73	http://www.scopus.com/inward/record.url?eid=2-s2.0-0025775860&partnerID=40&md5=9a6c76e917bd838260d64d349e4253e7	1648541		Genotyping/classification	GACAGTCGACTTCAGCTT3';	4721	4738	4730	1.6636	TGGTTATGGGGTGCGTGA	5251	5268	5260	1.688	548
Ref049	Chevaliez S, Bouvier-Alias M, Brillet R, Pawlotsky JM.	Overestimation and underestimation of hepatitis C virus RNA levels in a widely used real-time polymerase chain reaction-based method.	2007	Hepatology	46	1	22	/pubmed/17525931	17525931		Genotyping/classification	CACCATGAATCACTCCCCTG	28	47	38	1.832	CTTTTGGTTTTTCTTTGAGG	360	379	370	1.8548	352
Ref050	Chevaliez S., Bouvier-Alias M., Brillet R., Pawlotsky J.-M.	Hepatitis C virus (HCV) genotype 1 subtype identification in new HCV drug development and future clinical practice	2009	PLoS ONE	4	12		http://www.scopus.com/inward/record.url?eid=2-s2.0-77949514845&partnerID=40&md5=2117588328f96dc7e974ffd433dca9e6	19997618	[Ref493] and TruGene	Genotyping/classification		68						311			244
Ref050	Chevaliez S., Bouvier-Alias M., Brillet R., Pawlotsky J.-M.	Hepatitis C virus (HCV) genotype 1 subtype identification in new HCV drug development and future clinical practice	2009	PLoS ONE	4	12		http://www.scopus.com/inward/record.url?eid=2-s2.0-77949514845&partnerID=40&md5=2117588328f96dc7e974ffd433dca9e6	19997618	[Ref493] and TruGene	Genotyping/classification	CTGYTTTGACTCCACNGTRAC	8267	8288	8278	1.834	CATAGCCTCCGTGAAGGCTC	8611	8630	8621	1.6928	364
Ref051	Chevaliez S., Brillet R., Lazaro E., Hezode C., Pawlotsky J.-M.	Analysis of ribavirin mutagenicity in human hepatitis C virus infection	2007	Journal of Virology	81	14	7732	http://www.scopus.com/inward/record.url?eid=2-s2.0-34447248532&partnerID=40&md5=27afc78de8dce1b5cb6144581a468dca	17494069		Treatment response/resistance	GAGATACTTTTGGGACCGGCT	3366	3386	3377	1.8224	GGAGATGAGTTGTCTGTGAA	3969	3988	3979	1.8244	623
Ref051	Chevaliez S., Brillet R., Lazaro E., Hezode C., Pawlotsky J.-M.	Analysis of ribavirin mutagenicity in human hepatitis C virus infection	2007	Journal of Virology	81	14	7732	http://www.scopus.com/inward/record.url?eid=2-s2.0-34447248532&partnerID=40&md5=27afc78de8dce1b5cb6144581a468dca	17494069		Treatment response/resistance	CAGCCTTACCATCACCCAGC	6188	6207	6198	1.8476	GTGGTGACGCAGCAAAGAGT	7684	7703	7694	1.4728	1516
Ref052	Chinchai T., Noppornpanth S., Bedi K., Theamboonlers A., Poovorawan Y.	222 Base pairs in NS5B region and the determination of hepatitis C virus genotype 6	2006	Intervirology	49	4	224	http://www.scopus.com/inward/record.url?eid=2-s2.0-33646679138&partnerID=40&md5=666d41330476d6ebb9ca1625c9e9b8b8	16491017	[Ref079] and, [Ref397]	Genotyping/classification	CTCAACCGTCACTGAACAGGACAT	8276	8299	8288	1.7992	CCACGACTAGATCATCTCCG	8569	8589	8580	1.554	314
Ref052	Chinchai T., Noppornpanth S., Bedi K., Theamboonlers A., Poovorawan Y.	222 Base pairs in NS5B region and the determination of hepatitis C virus genotype 6	2006	Intervirology	49	4	224	http://www.scopus.com/inward/record.url?eid=2-s2.0-33646679138&partnerID=40&md5=666d41330476d6ebb9ca1625c9e9b8b8	16491017	[Ref079] and, [Ref397]	Genotyping/classification	CTCAACCGTCACTGAGAGAGACAT	8276	8299	8288	1.7992	GCTCTCAGGTTCCGCTCGTCCTCC	8591	8614	8603	1.7288	339
Ref053	Cho S.-H., Yoon J.I., Chang J.-E., Ahn B.M., Lee C.H., Lee Y.I.	Genomic typing of hepatitis C viruses from Korean patients: Implications of genome variation in the E2/NS1 region	1993	Biochemical and Biophysical Research Communications	196	2	780	http://www.scopus.com/inward/record.url?eid=2-s2.0-0027431676&partnerID=40&md5=7ce84d8c747ac51e0d45ed2586dd1ec9	8240354		Genotyping/classification	CTGATAGGGTGCTTGCGAGT	293	312	303	1.9232	AGAGCATATGCCGCCCCAGG	2751	2770	2761	1.7852	2478
Ref054	Chou W.-H., Yoneyama T., Takeuchi K., Harada H., Saito I., Miyamura T.	Discrimination of hepatitis C virus in liver tissues from different patients with hepatocellular carcinomas by direct nucleotide sequencing of amplified cDNA of the viral genome	1991	Journal of Clinical Microbiology	29	12	2860	http://www.scopus.com/inward/record.url?eid=2-s2.0-0025724960&partnerID=40&md5=258265611a74ea47e6beebfe16ad2aed	1661747		Natural history	CATGGTGTCCGGGTTCTGGA	798	817	808	1.3548	GACCAGTTCATCATCAT	1305	1321	1314	1.7424	524
Ref054	Chou W.-H., Yoneyama T., Takeuchi K., Harada H., Saito I., Miyamura T.	Discrimination of hepatitis C virus in liver tissues from different patients with hepatocellular carcinomas by direct nucleotide sequencing of amplified cDNA of the viral genome	1991	Journal of Clinical Microbiology	29	12	2860	http://www.scopus.com/inward/record.url?eid=2-s2.0-0025724960&partnerID=40&md5=258265611a74ea47e6beebfe16ad2aed	1661747		Natural history	GTCCTATGTGAGTGTTATGA	4887	4906	4897	1.562	GCGCACACTGTGGCTTGGTA	5106	5125	5116	1.8584	239
Ref055	Chung R.T., Monto A., Dienstag J.L., Kaplan L.M.	Mutations in the NS5A region do not predict interferon-responsiveness in American patients infected with genotype 1b hepatitis C virus	1999	Journal of Medical Virology	58	4	353	http://www.scopus.com/inward/record.url?eid=2-s2.0-0032791543&partnerID=40&md5=5fd4f60528cba119adc772c76d0e3e96	10421401	[Ref434] and [Ref412]	Treatment response/resistance	CAGGTACGCTCCGGCGTGCA	4948	4968	4959	1.7124	GGGGCCTTGGTAGGTGGCAA	7287	7305	7297	1.754	2358
Ref055	Chung R.T., Monto A., Dienstag J.L., Kaplan L.M.	Mutations in the NS5A region do not predict interferon-responsiveness in American patients infected with genotype 1b hepatitis C virus	1999	Journal of Medical Virology	58	4	353	http://www.scopus.com/inward/record.url?eid=2-s2.0-0032791543&partnerID=40&md5=5fd4f60528cba119adc772c76d0e3e96	10421401	[Ref434] and [Ref412]	Treatment response/resistance	GCGGGAGGAGGTATCATTCA	6764	6783	6774	1.5508	AGACTTCCGCAGGATTTCTG	7156	7175	7166	1.796	412
Ref056	Claeys H., Volckaerts A., Mertens W., Liang Z., Fiten P., Opdenakker G.	Localization and reactivity of an immunodominant domain in the NS3 region of hepatitis C virus	1995	Journal of Medical Virology	45	3	273	http://www.scopus.com/inward/record.url?eid=2-s2.0-0028924312&partnerID=40&md5=669d9fd1d6d114427cf8e468da1a9991	7539833		Evolution	CTGGATCCCATCCCAACATCGAGG	4408	4431	4420	1.7564	TCAAGCTTCTAGTAGAAGTCGCCGG	4675	4699	4688	1.5836	292
Ref056	Claeys H., Volckaerts A., Mertens W., Liang Z., Fiten P., Opdenakker G.	Localization and reactivity of an immunodominant domain in the NS3 region of hepatitis C virus	1995	Journal of Medical Virology	45	3	273	http://www.scopus.com/inward/record.url?eid=2-s2.0-0028924312&partnerID=40&md5=669d9fd1d6d114427cf8e468da1a9991	7539833		Evolution	CTGGATCCCAGACAGTCGATTTCAAG	4711	4736	4724	1.676	GTAAGCTTCTAGGGCGTGAGCTCATACC	4921	4948	4935	1.6836	238
Ref057	Cochrane A., Searle B., Hardie A., Robertson R., Delahooke T., Cameron S., Tedder R.S., Dusheiko G.M., De Lamballerie X., Simmonds P.	A genetic analysis of hepatitis C virus transmission between injection drug users	2002	Journal of Infectious Diseases	186	9	1212	http://www.scopus.com/inward/record.url?eid=2-s2.0-0036838256&partnerID=40&md5=a86e0847a26ece22a3b021786f917648	12402190		Clustering/transmission	CTCAACCGTCACTGAACAGGACAT	8276	8299	8288	1.7992	CCATGGAGTCTTTCAATGATTG	8983	9004	8994	1.6396	729
Ref058	Cody S.H., Nainan O.V., Garfein R.S., Meyers H., Bell B.P., Shapiro C.N., Meeks E.L., Pitt H., Mouzin E., Alter M.J., Margolis H.S., Vugia D.J.	Hepatitis C virus transmission from an anesthesiologist to a patient	2002	Archives of Internal Medicine	162	3	345	http://www.scopus.com/inward/record.url?eid=2-s2.0-0037060034&partnerID=40&md5=c0b58ec9838446d0dc60446311efcd13	11822928	New primers, plus [Ref404]	Clustering/transmission	TATTCCATGGTGGGGAACTGG	1425	1445	1436	1.8068	GCAGTCCTGTTGATGTGCCA	1599	1618	1609	1.52	194
Ref058	Cody S.H., Nainan O.V., Garfein R.S., Meyers H., Bell B.P., Shapiro C.N., Meeks E.L., Pitt H., Mouzin E., Alter M.J., Margolis H.S., Vugia D.J.	Hepatitis C virus transmission from an anesthesiologist to a patient	2002	Archives of Internal Medicine	162	3	345	http://www.scopus.com/inward/record.url?eid=2-s2.0-0037060034&partnerID=40&md5=c0b58ec9838446d0dc60446311efcd13	11822928	New primers, plus [Ref404]	Clustering/transmission	TGGGGATCCCGTATGATACCCGCTGCTTTGA	8245	8275	8261	1.7908	GGCGGAATTCCTGGTCATAGCCTCCGTGAA	8616	8645	8631	1.5956	401
Ref059	Colina R., Azambuja C., Uriarte R., Mogdasy C., Cristina J.	Evidence of increasing diversification of hepatitis C viruses	1999	Journal of General Virology	80	6	1377	http://www.scopus.com/inward/record.url?eid=2-s2.0-0032978004&partnerID=40&md5=6b02067359d2c42fa7c5c540080204d9	10374954	[Ref397]	Evolution	TTCACGCAGAAAGCGTCTAG	63	82	73	1.9576	CACTCTCGAGCACCCTATCAGGCAGT	288	313	301	1.9248	251
Ref060	Colina R., Casane D., Vasquez S., Garcia-Aguirre L., Chunga A., Romero H., Khan B., Cristina J.	Evidence of intratypic recombination in natural populations of hepatitis C virus	2004	Journal of General Virology	85	1	31	http://www.scopus.com/inward/record.url?eid=2-s2.0-1642503756&partnerID=40&md5=2226e848ff62c350701eda9be0626d34	14718617	[Ref397] and [Ref226]	Evolution	TTCACGCAGAAAGCGTCTAG	63	82	73	1.9576	CACTCTCGAGCACCCTATCAGGCAGT	288	313	301	1.9248	251
Ref060	Colina R., Casane D., Vasquez S., Garcia-Aguirre L., Chunga A., Romero H., Khan B., Cristina J.	Evidence of intratypic recombination in natural populations of hepatitis C virus	2004	Journal of General Virology	85	1	31	http://www.scopus.com/inward/record.url?eid=2-s2.0-1642503756&partnerID=40&md5=2226e848ff62c350701eda9be0626d34	14718617	[Ref397] and [Ref226]	Evolution	AGGTCTCGTAGACCGTGCATCATGAGCAC	321	349	336	1.8912	ATGTACCCCATGAGGTCGGC	732	751	742	1.5604	431
Ref060	Colina R., Casane D., Vasquez S., Garcia-Aguirre L., Chunga A., Romero H., Khan B., Cristina J.	Evidence of intratypic recombination in natural populations of hepatitis C virus	2004	Journal of General Virology	85	1	31	http://www.scopus.com/inward/record.url?eid=2-s2.0-1642503756&partnerID=40&md5=2226e848ff62c350701eda9be0626d34	14718617	[Ref397] and [Ref226]	Evolution	CTCAACCGTCACTGAACAGGACAT	8276	8299	8288	1.7992	CCACGACTAGATCATCTCCG	8569	8589	8580	1.554	314
Ref061	Colson P, Brouk N, Lembo F, Castellani P, Tamalet C, GÃ©rolami R.	Natural presence of substitution R155K within hepatitis C virus NS3 protease from a treatment-naÃ¯ve chronically infected patient.	2008	Hepatology	47	2	766	/pubmed/18220300	18220300		Treatment response/resistance	ACsGCrGCrTGygGGGACAT	3309	3328	3319	1.756	GTGCTCTTrCCGCTrCCrGT.	4098	4114	4107	1.8744	806
Ref062	Cook L, Sullivan K, Krantz EM, Bagabag A, Jerome KR.	Multiplex real-time reverse transcription-PCR assay for determination of hepatitis C virus genotypes.	2006	J Clin Microbiol	44	11	4149	/pubmed/16988019	16988019	[Ref034]	Genotyping/classification	AGGAATCCTGGTACTGCCTGATAGGGTGCT	276	305	291	1.9568	CAGCGAATCCAAGAGGGGCGCCGACGAGCG	754	783	769	1.4048	508
Ref063	Corbet S., Bukh J., Heinsen A., Fomsgaard A.	Hepatitis C virus subtyping by a core-envelope 1-based reverse transcriptase PCR assay with sequencing and its use in determining subtype distribution among Danish patients	2003	Journal of Clinical Microbiology	41	3	1091	http://www.scopus.com/inward/record.url?eid=2-s2.0-0344406256&partnerID=40&md5=425ad1d8c7408b66889753e2fb7eacf6	12624035	new PCR, plus [Ref32]	Epidemiology	ACGCAGAAAGCGTCTAGCCATGGCGTTAGT	66	95	81	1.956	TCCCGGGGCACTCGCAAGCACCCTATCAGG	292	321	307	1.926	256
Ref063	Corbet S., Bukh J., Heinsen A., Fomsgaard A.	Hepatitis C virus subtyping by a core-envelope 1-based reverse transcriptase PCR assay with sequencing and its use in determining subtype distribution among Danish patients	2003	Journal of Clinical Microbiology	41	3	1091	http://www.scopus.com/inward/record.url?eid=2-s2.0-0344406256&partnerID=40&md5=425ad1d8c7408b66889753e2fb7eacf6	12624035	new PCR, plus [Ref32]	Epidemiology	AACCTTCCTGGTTGCTCTTTCTCTAT	843	868	856	1.4252	GTTCATCATCATATCCCATGCCAT	1293	1316	1305	1.71	474
Ref064	Cuevas J.M., Torres-Puente M., Jimenez-Hernandez N., Bracho M.A., Garcia-Robles I., Wrobel B., Carnicer F., del Olmo J., Ortega E., Moya A., Gonzalez-Candelas F.	Genetic variability of hepatitis C virus before and after combined therapy of interferon plus ribavirin	2008	PLoS ONE	3	8		http://www.scopus.com/inward/record.url?eid=2-s2.0-52449097214&partnerID=40&md5=5b38bd7c3e10f4a859008a2b51a2f2cd	18725975	[Ref137]	Treatment response/resistance	GGRATATGATGATGAACTGGTC	1300	1321	1311	1.694	GGAGTGAAGCARTATACTGG	1854	1873	1864	1.5528	574
Ref064	Cuevas J.M., Torres-Puente M., Jimenez-Hernandez N., Bracho M.A., Garcia-Robles I., Wrobel B., Carnicer F., del Olmo J., Ortega E., Moya A., Gonzalez-Candelas F.	Genetic variability of hepatitis C virus before and after combined therapy of interferon plus ribavirin	2008	PLoS ONE	3	8		http://www.scopus.com/inward/record.url?eid=2-s2.0-52449097214&partnerID=40&md5=5b38bd7c3e10f4a859008a2b51a2f2cd	18725975	[Ref137]	Treatment response/resistance	TAGGTWYGCSCCCCCYTGCA	6734	6753	6744	1.554	CCCTCSAGRGGGGGCAT	7503	7519	7512	1.2296	786
Ref065	Curry S, Qiu P, Tong X.	Analysis of HCV resistance mutations during combination therapy with protease inhibitor boceprevir and PEG-IFN alpha-2b using TaqMan mismatch amplification mutation assay.	2008	J Virol Methods	153	2	156	/pubmed/18755220	18755220		Treatment response/resistance	GACATCATCTTGGGTCTGCCCGTCTC	3324	3349	3337	1.7732	GTGGGAGCGTGTAGGTGGGC	4017	4036	4027	1.768	713
Ref066	Da Silva Cardoso M., Siemoneit K., Nemecek V., Epple S., Koerner K., Kubanek B.	The serology of hepatitis C virus (HCV) infection: Antibody crossreaction in the hypervariable region 1	1995	Archives of Virology	140	10	1705	http://www.scopus.com/inward/record.url?eid=2-s2.0-0028855441&partnerID=40&md5=6f6bb088e61edfc0f3e386792058eee3	7503672		Natural history	CACAAGCCGTCGTGGACATG	1363	1382	1373	1.4832	GAACCTGTGTGCGTAGAAC	1564	1682	1624	1.7704	320
Ref067	De Oliveira J.M., Rispeter K., Viazov S., Saback F.L., Roggendorf M., Yoshida C.F.T.	Differences in HCV antibody patterns in haemodialysis patients infected with the same virus isolate	2001	Journal of Medical Virology	63	4	265	http://www.scopus.com/inward/record.url?eid=2-s2.0-0035127418&partnerID=40&md5=437c73011f03e3b2b9b1fed447f24dd3	11241456	[Ref355]	Clustering/transmission	GAGTWTACBTGYTGCCGCGCAG	439	460	450	1.9216	ATRTACCCCATGAGRTCGGC	732	751	742	1.5604	313
Ref068	Detmer J., Lagier R., Flynn J., Zayati C., Kolberg J., Collins M., Urdea M., Sanchez-Pescador R.	Accurate quantification of hepatitis C virus (HCV) RNA from all HCV genotypes by using branched-DNA technology	1996	Journal of Clinical Microbiology	34	4	901	http://www.scopus.com/inward/record.url?eid=2-s2.0-0029985468&partnerID=40&md5=2435a57ef054a8080e6e27e56e62e545	8815105	New primers, plus [Ref395]	Genotyping/classification	GACACTCCACCATGAATCACTCCCCTG	21	47	35	1.818	CCCTGTTGCATAGTTCACGCCGTC	819	842	831	1.404	822
Ref068	Detmer J., Lagier R., Flynn J., Zayati C., Kolberg J., Collins M., Urdea M., Sanchez-Pescador R.	Accurate quantification of hepatitis C virus (HCV) RNA from all HCV genotypes by using branched-DNA technology	1996	Journal of Clinical Microbiology	34	4	901	http://www.scopus.com/inward/record.url?eid=2-s2.0-0029985468&partnerID=40&md5=2435a57ef054a8080e6e27e56e62e545	8815105	New primers, plus [Ref395]	Genotyping/classification	TGGGGATCCCGTATGATACCCGCTGCTTTGA	8245	8275	8261	1.7908	GGCGGAATTCCTGGTCATAGCCTCCGTGAA	8616	8645	8631	1.5956	401
Ref069	Devereux H., Telfer P., Brown D., Morris A., Dusheiko G., Emery V., Lee C.	Longitudinal genotype analysis and quantification of hepatitis C virus in haemophilia patients receiving interferon-Î± therapy	1996	Journal of Viral Hepatitis	3	1	43	http://www.scopus.com/inward/record.url?eid=2-s2.0-0029686064&partnerID=40&md5=8420ffbaeca0a853429adcaec3fbd57a	8736240	[Ref489]	Genotyping/classification	GCGGCCGCACTGTCTTCACGCAGAAAG	49	75	63	1.9544	AGTCTTGCGGCCGCAGCGCCAAATC	224	248	237	1.8808	200
Ref070	Djebbi A., Triki H., Bahri O., Cheikh I., Sadraoui A., Ben Ammar A., Dellagi K.	Genotypes of hepatitis C virus circulating in Tunisia	2003	Epidemiology and Infection	130	3	501	http://www.scopus.com/inward/record.url?eid=2-s2.0-0038004047&partnerID=40&md5=68f624dd06f486011c8a5d8a0dd61f64	12825736	[Ref397]	Epidemiology	TTCACGCAGAAAGCGTCTAG	63	82	73	1.9576	CACTCTCGAGCACCCTATCAGGCAGT	288	313	301	1.9248	251
Ref071	Doi H., Apichartpiyakul C., Ohba K.-I., Mizokami M., Hotta H.	Hepatitis C virus (HCV) subtype prevalence in Chiang Mai, Thailand, and identification of novel subtypes of HCV major type 6	1996	Journal of Clinical Microbiology	34	3	569	http://www.scopus.com/inward/record.url?eid=2-s2.0-0030058610&partnerID=40&md5=151cc0ab5f9de522def32ed4ef1590c6	8904416	[Ref072], [Ref508], [Ref509]	Epidemiology	TGGTCTGCGGAACCGGTGAG	144	163	154	1.9472	ACCCAACACTACTCGGCTAG	250	269	260	1.9404	126
Ref071	Doi H., Apichartpiyakul C., Ohba K.-I., Mizokami M., Hotta H.	Hepatitis C virus (HCV) subtype prevalence in Chiang Mai, Thailand, and identification of novel subtypes of HCV major type 6	1996	Journal of Clinical Microbiology	34	3	569	http://www.scopus.com/inward/record.url?eid=2-s2.0-0030058610&partnerID=40&md5=151cc0ab5f9de522def32ed4ef1590c6	8904416	[Ref072], [Ref508], [Ref509]	Epidemiology	GAGGTCTCGTAGACCGTGCA	320	339	330	1.9184	GCCCAGGACCTGCCTTCGCT	552	571	562	1.81	252
Ref071	Doi H., Apichartpiyakul C., Ohba K.-I., Mizokami M., Hotta H.	Hepatitis C virus (HCV) subtype prevalence in Chiang Mai, Thailand, and identification of novel subtypes of HCV major type 6	1996	Journal of Clinical Microbiology	34	3	569	http://www.scopus.com/inward/record.url?eid=2-s2.0-0030058610&partnerID=40&md5=151cc0ab5f9de522def32ed4ef1590c6	8904416	[Ref072], [Ref508], [Ref509]	Epidemiology	TTGCTCTTTCTCTATCTTCC	854	874	865	1.4068	GACCAGTTCATCATCATATC	1302	1321	1312	1.7488	468
Ref071	Doi H., Apichartpiyakul C., Ohba K.-I., Mizokami M., Hotta H.	Hepatitis C virus (HCV) subtype prevalence in Chiang Mai, Thailand, and identification of novel subtypes of HCV major type 6	1996	Journal of Clinical Microbiology	34	3	569	http://www.scopus.com/inward/record.url?eid=2-s2.0-0030058610&partnerID=40&md5=151cc0ab5f9de522def32ed4ef1590c6	8904416	[Ref072], [Ref508], [Ref509]	Epidemiology	TTTGACTCAACCGTCACTGA	8271	8290	8281	1.8328	TAGCACGTCATGGTGTTTCCCAT	8465	8488	8477	1.5684	218
Ref072	Doi H., Yoon S., Homma M., Hotta H.	Identification of hepatitis C virus subtype 3b (HCV-3b) among Japanese patients with liver diseases using highly efficient primers for reverse transcription-polymerase chain reaction	1994	Microbiology and Immunology	38	2	159	http://www.scopus.com/inward/record.url?eid=2-s2.0-0028210033&partnerID=40&md5=597a26715bb373604743fa6b4724c5d2	8041304	Modified: [Ref488] - reference not available	Genotyping/classification	TTTGACTCAACCGTCACTGA	8271	8290	8281	1.8328	CTCAGGCTCGCCGCATCCTC	8592	8611	8602	1.7228	341
Ref073	Dries V, von Both I, MÃ¼ller M, Gerken G, Schirmacher P, Odenthal M, Bartenschlager R, Drebber U, Meyer zum BÃ¼schenfeld KH, Dienes HP.	Detection of hepatitis C virus in paraffin-embedded liver biopsies of patients negative for viral RNA in serum.	1999	Hepatology	29	1	223	/pubmed/9862870	9862870		Genotyping/classification	GTCTGCGGAACCGGTGAGTACA	146	167	157	1.9528	CGACCCAACACTACTCGGCTAG	250	271	261	1.9404	126
Ref074	Elahi E., Pourmand N., Chaung R., Rofoogaran A., Boisver J., Samimi-Rad K., Davis R.W., Ronaghi M.	Determination of hepatitis C virus genotype by Pyrosequencing	2003	Journal of Virological Methods	109	2	171	http://www.scopus.com/inward/record.url?eid=2-s2.0-0037406064&partnerID=40&md5=30695176fc899832be814de4efd043e9	12711060		Genotyping/classification	TCTAGCCATGGCGTTAGTAYGAGTGT	78	103	91	1.9452	CACTCGCAAGCACCCTATCAGGCAGT	288	313	301	1.9248	236
Ref075	El-Shamy A., Nagano-Fujii M., Sasase N., Imoto S., Kim S.-R., Hotta H.	Sequence variation in hepatitis C virus nonstructural protein 5A predicts clinical outcome of pegylated interferon/ribavirin combination therapy	2008	Hepatology	48	1	38	http://www.scopus.com/inward/record.url?eid=2-s2.0-47149083069&partnerID=40&md5=02491179c0c2b9a29f19e169114643b5	18537193		Treatment response/resistance	TCTCCAGCCTTACCATCACYCA	6484	6205	6345	1.7692	CGGTARTGRTCGTCCAGGAC	7776	7795	7786	1.7708	1312
Ref076	El-Shamy A., Shoji I., Saito T., Watanabe H., Ide Y.-H., Deng L., Kawata S., Hotta H.	Sequence heterogeneity of NS5A and core proteins of hepatitis C virus and virological responses to pegylated-interferon/ribavirin combination therapy	2011	Microbiology and Immunology	55	6	418	http://www.scopus.com/inward/record.url?eid=2-s2.0-79957623354&partnerID=40&md5=340b82bbe110f6475c52f7d334aad985	21371092	[Ref075], [R486], [Ref487]	Treatment response/resistance	ACTGCCTGATAGGGTGCTTG	288	307	298	1.9664	GAGCAGTCGTTCGTGACATGGTA	942	964	954	1.5392	677
Ref076	El-Shamy A., Shoji I., Saito T., Watanabe H., Ide Y.-H., Deng L., Kawata S., Hotta H.	Sequence heterogeneity of NS5A and core proteins of hepatitis C virus and virological responses to pegylated-interferon/ribavirin combination therapy	2011	Microbiology and Immunology	55	6	418	http://www.scopus.com/inward/record.url?eid=2-s2.0-79957623354&partnerID=40&md5=340b82bbe110f6475c52f7d334aad985	21371092	[Ref075], [R486], [Ref487]	Treatment response/resistance	TCTCCAGCCTTACCATCACYCA	6484	6205	6345	1.7692	CGGTARTGRTCGTCCAGGAC	7776	7795	7786	1.7708	1312
Ref077	Enomoto N., Kurosaki M., Tanaka Y., Marumo F., Sato C.	Fluctuation of hepatitis C virus quasispecies in persistent infection and interferon treatment revealed by single-strand conformation polymorphism analysis	1994	Journal of General Virology	75	6	1361	http://www.scopus.com/inward/record.url?eid=2-s2.0-0028358840&partnerID=40&md5=6fa4c59aff8e718cec33117cd841ab1c	8207402		Natural history	CTATTCCATGGTAGGGAACTGGGCTAAGGT	1424	1453	1439	1.8144	TTAGGGCGGTGCGGTTGATGTGCCA	1599	1623	1612	1.5172	200
Ref078	Enomoto N., Sakuma I., Asahina Y., Kurosaki M., Murakami T., Yamamoto C., Ogura Y., Izumi N., Marumo F., Sato C.	Mutations in the nonstructural protein 5A gene and response to interferon in patients with chronic hepatitis C virus 1b infection	1996	New England Journal of Medicine	334	2	77	http://www.scopus.com/inward/record.url?eid=2-s2.0-9144257569&partnerID=40&md5=dd7a9a69457af6ef73ffdb028f9096d3	8531962		Treatment response/resistance	CAGGTACGCTCCGGCGTGCA	4948	4968	4959	1.7124	GGGGCCTTGGTAGGTGGCAA	7287	7305	7297	1.754	2358
Ref079	Enomoto N., Takada A., Nakao T., Date T.	There are two major types of hepatitis C virus in Japan	1990	Biochemical and Biophysical Research Communications	170	3	1021	http://www.scopus.com/inward/record.url?eid=2-s2.0-0025121479&partnerID=40&md5=a97cb8998a961d52b48e69de15d6e6ac	2117923		Epidemiology	TGGGGATCCCGTATGATACCCGCTGCTTTGA	8245	8275	8261	1.7908	GGCGGAATTCCTGGTCATAGCCTCCGTGAA	8616	8645	8631	1.5956	401
Ref081	Esteban J.I., Gomez J., Martell M., Cabot B., Quer J., Camps J., Gonzalez A., Otero T., Moya A., Esteban R., Guardia J.	Transmission of hepatitis C virus by a cardiac surgeon	1996	New England Journal of Medicine	334	9	555	http://www.scopus.com/inward/record.url?eid=2-s2.0-13344281012&partnerID=40&md5=0e35caef23bebe9eb2a63185d5438a41	8569822	[Ref237]	Clustering/transmission	AGCGAATTCAAGCTATGAACCCGGTGTTTAT	1444	1475	1460	1.7084	TTTGGATCCTGCAAGGCAACTGGGCCAAGGT	1639	1670	1655	1.7748	227
Ref082	Fan X., Di Bisceglie A.M.	Diversification of hypervariable region 1 of hepatitis C virus after liver transplantation	2003	Journal of Medical Virology	70	2	212	http://www.scopus.com/inward/record.url?eid=2-s2.0-0037410261&partnerID=40&md5=2c38f9f14b094b1b8c159657c200e237	12696107		evolution	GGTACATCCCTGTCGTTGGC	745	764	755	1.4672	ACTCGAAGCTTATAGATCTCACCCCTCCTACATACATCC	2242	2261	2252	1.4836	1517
Ref082	Fan X., Di Bisceglie A.M.	Diversification of hypervariable region 1 of hepatitis C virus after liver transplantation	2003	Journal of Medical Virology	70	2	212	http://www.scopus.com/inward/record.url?eid=2-s2.0-0037410261&partnerID=40&md5=2c38f9f14b094b1b8c159657c200e237	12696107		Evolution	GTACTGAATTCCACTGGGGTGTGGTGTTTG	1395	1414	1405	1.7092	ACTCGAGATCTGAAAGTCATCCAGCCTACGG	1718	1737	1728	1.6148	343
Ref083	Fan X., Lang D.M., Xu Y., Lyra A.C., Yusim K., Everhart J.E., Korber B.T.M., Perelson A.S., Di Bisceglie A.M.	Liver transplantation with hepatitis C virus-infected graft: Interaction between donor and recipient viral strains	2003	Hepatology	38	1	25	http://www.scopus.com/inward/record.url?eid=2-s2.0-0038122779&partnerID=40&md5=1345f0ed8a848454303d0ecb7191119e	12829983	[Ref084], [Ref484], [Ref485]	Evolution	5'Race	1				3'Race		9426			9426
Ref083	Fan X., Lang D.M., Xu Y., Lyra A.C., Yusim K., Everhart J.E., Korber B.T.M., Perelson A.S., Di Bisceglie A.M.	Liver transplantation with hepatitis C virus-infected graft: Interaction between donor and recipient viral strains	2003	Hepatology	38	1	25	http://www.scopus.com/inward/record.url?eid=2-s2.0-0038122779&partnerID=40&md5=1345f0ed8a848454303d0ecb7191119e	12829983	[Ref084], [Ref484], [Ref485]	Evolution	gtactgaattcggtaccggttgctctttctctatcttcc	835	873	855	1.396	actcgaagcttagatctttgasrgtgcargggtagtgcc	2188	2227	2208	1.4152	1393
Ref084	Fan X., Lyra A.C., Tan D., Xu Y., Di Bisceglie A.M.	Differential amplification of hypervariable region 1 of hepatitis C virus by partially mismatched primers	2001	Biochemical and Biophysical Research Communications	284	3	694	http://www.scopus.com/inward/record.url?eid=2-s2.0-0034817076&partnerID=40&md5=d535d7e80132af09c2cd101f2a1ddf16	11396957		Natural history	GGTACATCCCTGTCGTTGGC	745	764	755	1.4672	actcgagatctgtatctccytyccccttcgg	3353	3381	3368	1.8444	2637
Ref084	Fan X., Lyra A.C., Tan D., Xu Y., Di Bisceglie A.M.	Differential amplification of hypervariable region 1 of hepatitis C virus by partially mismatched primers	2001	Biochemical and Biophysical Research Communications	284	3	694	http://www.scopus.com/inward/record.url?eid=2-s2.0-0034817076&partnerID=40&md5=d535d7e80132af09c2cd101f2a1ddf16	11396957		Natural history	gtactgaattcggtaccggttgctctttctctatcttcc	835	873	855	1.396	actcgaagcttagatctttgasrgtgcargggtagtgcc	2188	2227	2208	1.4152	1393
Ref086	Ferri C., Monti M., La Civita L., Longombardo G., Greco F., Pasero G., Gentilini P., Bombardieri S., Zignego A.L.	Infection of peripheral blood mononuclear cells by hepatitis C virus in mixed cryoglobulinemia	1993	Blood	82	12	3701	http://www.scopus.com/inward/record.url?eid=2-s2.0-0027143183&partnerID=40&md5=971db937b915855b2f8d3a24d989e36a	8260706	[Ref482], and [Ref481]	Natural history	GTGCAGCCTCCAGGACCCCC	105	124	115	1.9084	GGGCACTCGCAAGCACCCTAT	296	316	307	1.926	212
Ref087	Feucht H.H., Zollner B., Schroter M., Hoyer A., Sterneck M., Polywka S.	Distribution of genotypes and response to alpha-interferon in patients with hepatitis C virus infection in Germany	1996	European Journal of Clinical Microbiology and Infectious Diseases	15	2	128	http://www.scopus.com/inward/record.url?eid=2-s2.0-0030000391&partnerID=40&md5=f050f104a9d0006c0475e981cbbe9df9	8801084		Epidemiology	ACTGAATTCTCGTATGATACCCGC	8244	8267	8256	1.7704	GTCAAGCTTCACAGATAACG	8564	8583	8574	1.5688	340
Ref088	Forcic D., Zgorelec R., Branovic K., Kosutic-Gulija T., Santak M., Mazuran R.	Incidence of hepatitis C virus RNA in anti-HCV negative plasma pools in Croatia	2001	Transfusion and Apheresis Science	24	3	269	http://www.scopus.com/inward/record.url?eid=2-s2.0-0035181916&partnerID=40&md5=b7e507e223c8cbee91f32706c7d4a2cf	11791702	[Ref449]	Genotyping/classification	GCAGAAAGCGTCTAGCCATGGCGT	68	91	80	1.9556	CTCGCAAGCACCCTATCAGGCAGT	288	311	300	1.926	244
Ref089	Forns X, Maluenda MD, LÃ³pez-Labrador FX, AmpurdanÃ¨s S, Olmedo E, Costa J, Simmonds P, SÃ¡nchez-Tapias JM, Jimenez De Anta MT, RodÃ©s J.	Comparative study of three methods for genotyping hepatitis C virus strains in samples from Spanish patients.	1996	J Clin Microbiol	34	10	2516	/pubmed/8880512	8880512	[Ref480]	Genotyping/classification	CCACCATAGATCTCTCCCCTGT	27	48	38	1.832	CACTCTCGAGCACCCTATCAGGCAGT	288	313	301	1.9248	287
Ref090	Fox S.A.	Rapid genotyping of hepatitis C virus isolates by dideoxy fingerprinting	1995	Journal of Virological Methods	53	1	1	http://www.scopus.com/inward/record.url?eid=2-s2.0-0029047006&partnerID=40&md5=a44521929fbc3bbc7c0425f01ff50dc1	7543486		Genotyping/classification	CCACCATAGATCACTCCCCTGT	27	48	38	1.832	CACTCGCAAGCACCCTATCAGGCAGT	288	313	301	1.9248	287
Ref091	Frangeul L., Cresta P., Perrin M., Lunel F., Opolon P., Agut H., Huraux J.-M.	Mutations in NS5A region of hepatitis C virus genome correlate with presence of NS5A antibodies and response to interferon therapy for most common European hepatitis C virus genotypes	1998	Hepatology	28	6	1674	http://www.scopus.com/inward/record.url?eid=2-s2.0-0031793049&partnerID=40&md5=68078b005c96eee2f6d9025b9ba61173	9828234	[Ref412], [Ref468], [Ref479], [Ref217]	Treatment response/resistance	CCCCGGCGCCVAACTATTCYARGGC	6559	6583	6572	1.6964	GCATGGAGGAGHACGAYTCADCGTC	7482	7506	7495	1.3288	948
Ref092	Furusyo N., Kubo N., Nakashima H., Kashiwagi K., Etoh Y., Hayashi J.	Confirmation of nosocomial hepatitis C virus infection in a hemodialysis unit	2004	Infection Control and Hospital Epidemiology	25	7	584	http://www.scopus.com/inward/record.url?eid=2-s2.0-3242714325&partnerID=40&md5=64d57a1a27d0762edec2772ef115ac0b	15301031	New PCR, plus [Ref236]	Clustering/transmission	TTCACGCAGAAAGCGTCTAG	63	82	73	1.9576	GTTGATCCAAGAAAGGACCC	188	207	198	1.8708	145
Ref092	Furusyo N., Kubo N., Nakashima H., Kashiwagi K., Etoh Y., Hayashi J.	Confirmation of nosocomial hepatitis C virus infection in a hemodialysis unit	2004	Infection Control and Hospital Epidemiology	25	7	584	http://www.scopus.com/inward/record.url?eid=2-s2.0-3242714325&partnerID=40&md5=64d57a1a27d0762edec2772ef115ac0b	15301031	New PCR, plus [Ref236]	Clustering/transmission	CGCGCGACTAGGAAGACTTC	480	499	490	1.93648	GCACGTAAGGGTATCGATGACCT	703	725	715	1.5424	246
Ref093	Gabrielli A., Manzin A., Candela M., Caniglia M.L., Paolucci S., Danieli M.G., Clementi M.	Active hepatitis C virus infection in bone marrow and peripheral blood mononuclear cells from patients with mixed cryoglobulinaemia	1994	Clinical and Experimental Immunology	97	1	87	http://www.scopus.com/inward/record.url?eid=2-s2.0-0028144877&partnerID=40&md5=2a4e1ef5271022d2f843d7008cb2eeb9	8033425		Genotyping/classification	ACCATAGATCACTCCCCTGTGAGGAACTA	29	57	44	1.8644	CAC TCG CAA GCA CCC TATCAG GCA GTA CCA	284	313	299	1.9272	285
Ref094	Gao F., Nainan O.V., Khudyakov Y., Li J., Hong Y., Gonzales A.C., Spelbring J., Margolis H.S.	Recombinant hepatitis C virus in experimentally infected chimpanzees	2007	Journal of General Virology	88	1	143	http://www.scopus.com/inward/record.url?eid=2-s2.0-33846160587&partnerID=40&md5=a0b284a1654c205445717692a78fd4bc	17170446		Evolution	CCGGTTGCTCTTTCTCTATCTT	850	871	861	1.3924	GCAGTCCTGTTGATGTGCCA	1599	1618	1609	1.52	769
Ref095	Gao G., Buskell Z., Seeff L., Tabor E.	Drift in the hypervariable region of the hepatitis C virus during 27 years in two patients	2002	Journal of Medical Virology	68	1	60	http://www.scopus.com/inward/record.url?eid=2-s2.0-0036021187&partnerID=40&md5=5c38fe13e0a98e1a86553c7095fbd6e8	12210431		Clustering/transmission	ACGCAGAAAGCGTCTAGCCATGGCGTTAGT	66	95	81	1.956	TCCCGGGGCACTCGCAAGCACCCTATCAGG	292	321	307	1.926	256
Ref095	Gao G., Buskell Z., Seeff L., Tabor E.	Drift in the hypervariable region of the hepatitis C virus during 27 years in two patients	2002	Journal of Medical Virology	68	1	60	http://www.scopus.com/inward/record.url?eid=2-s2.0-0036021187&partnerID=40&md5=5c38fe13e0a98e1a86553c7095fbd6e8	12210431		Clustering/transmission	ATGGTGGGGAACTGGGCGAAGG	1431	1452	1442	1.8128	ATGTGCCAACTGCCGTTGGT	1587	1606	1597	1.3968	176
Ref096	Gaudy C., Moreau A., Veillon P., Temoin S., Lunel F., Goudeau A.	Significance of pretreatment analysis of hepatitis C virus genotype 1b hypervariable region 1 sequences to predict antiviral outcome	2003	Journal of Clinical Microbiology	41	8	3615	http://www.scopus.com/inward/record.url?eid=2-s2.0-0041522557&partnerID=40&md5=e2eafecc1b66be758f7bd992720e1fb2	12904364	[Ref173]	Treatment response/resistance	GCTTGGATATGATGATGAACTGGTC	1296	1321	1309	1.7116	TGCCACCTGCCATTGGTGTT	1584	1603	1594	1.2892	308
Ref097	Germer J.J., Rys P.N., Thorvilson J.N., Persing D.H.	Determination of hepatitis C virus genotype by direct sequence analysis of products generated with the amplicor HCV test	1999	Journal of Clinical Microbiology	37	8	2625	http://www.scopus.com/inward/record.url?eid=2-s2.0-0032796827&partnerID=40&md5=a6bafd28866a56ef686d8ada16d37b0e	10405412	[Ref478]	Genotyping/classification	GCAGAAAGCGTCTAGCCATGGCGT	68	91	80	1.9556	ACAAGGCCTTTCGC	271	284	278	1.934	217
Ref097	Germer J.J., Rys P.N., Thorvilson J.N., Persing D.H.	Determination of hepatitis C virus genotype by direct sequence analysis of products generated with the amplicor HCV test	1999	Journal of Clinical Microbiology	37	8	2625	http://www.scopus.com/inward/record.url?eid=2-s2.0-0032796827&partnerID=40&md5=a6bafd28866a56ef686d8ada16d37b0e	10405412	[Ref478]	Genotyping/classification	TGGGGATCCCGTATGATACCCGCTGCTTTGA	8245	8275	8261	1.7908	GGCGGAATTCCTGGTCATAGCCTCCGTGAA	8618	8645	8632	1.5856	401
Ref098	Giannini C., Giannelli F., Monti M., Careccia G., Marrocchi M.E., Laffi G., Gentilini P., Zignego A.L.	Prevalence of mixed infection by different hepatitis C virus genotypes in patients with hepatitis C virus-related chronic liver disease	1999	Journal of Laboratory and Clinical Medicine	134	1	68	http://www.scopus.com/inward/record.url?eid=2-s2.0-0033166244&partnerID=40&md5=55b49cda3519e0d3f132f6fded5f8e7f	10402061	New PCR from two manuscript: [Ref236], and [Ref99]	Genotyping/classification	CGCGCGACTAGGAAGACTTC	480	499	490	1.93648	CCGCACGTAGGGTATCGATGAC	705	727	717	1.5108	248
Ref099	Giannini C., Thiers V., Nousbaum J.-B., Stuyver L., Maertens G., Brechot C.	Comparative analysis of two assays for genotyping hepatitis C virus based on genotype-specific primers or probes	1995	Journal of Hepatology	23	3	246	http://www.scopus.com/inward/record.url?eid=2-s2.0-0029122085&partnerID=40&md5=9087438c8732fc44e863e6b7dfcfff6c	8550987	New primer, plus [Ref236]	Genotyping/classification	CGCGCGACTAGGAAGACTTC	480	499	490	1.93648	CCGCACGTAGGGTATCGATGAC	705	727	717	1.5108	248
Ref100	Gimenez-Barcons M., Franco S., Suarez Y., Forns X., Ampurdanes S., Puig-Basagoiti F., Sanchez-Fueyo A., Barrera J.-M., Llovet J.-M., Bruix J., Sanchez-Tapias J.-M., Rodes J., Saiz J.-C.	High amino acid variability within the NS5A of hepatitis C virus (HCV) is associated with hepatocellular carcinoma in patients with HCV-1b-related cirrhosis	2001	Hepatology	34	1	158	http://www.scopus.com/inward/record.url?eid=2-s2.0-0034961822&partnerID=40&md5=6540dba900fef2b9edf7e2b6c65eac44	11431747		Evolution	GGGAGGTCTCGTAGACCGTGCA	318	339	329	1.922	ATGTACCCCATGAGGTCGGC	732	751	742	1.5604	434
Ref100	Gimenez-Barcons M., Franco S., Suarez Y., Forns X., Ampurdanes S., Puig-Basagoiti F., Sanchez-Fueyo A., Barrera J.-M., Llovet J.-M., Bruix J., Sanchez-Tapias J.-M., Rodes J., Saiz J.-C.	High amino acid variability within the NS5A of hepatitis C virus (HCV) is associated with hepatocellular carcinoma in patients with HCV-1b-related cirrhosis	2001	Hepatology	34	1	158	http://www.scopus.com/inward/record.url?eid=2-s2.0-0034961822&partnerID=40&md5=6540dba900fef2b9edf7e2b6c65eac44	11431747		Evolution	ATGGTGGGTACCTGGGCTAAGGT	1431	1453	1443	1.8124	GGTCTAGATGCGTAGTGCCAGCA	1797	1819	1809	1.3464	389
Ref100	Gimenez-Barcons M., Franco S., Suarez Y., Forns X., Ampurdanes S., Puig-Basagoiti F., Sanchez-Fueyo A., Barrera J.-M., Llovet J.-M., Bruix J., Sanchez-Tapias J.-M., Rodes J., Saiz J.-C.	High amino acid variability within the NS5A of hepatitis C virus (HCV) is associated with hepatocellular carcinoma in patients with HCV-1b-related cirrhosis	2001	Hepatology	34	1	158	http://www.scopus.com/inward/record.url?eid=2-s2.0-0034961822&partnerID=40&md5=6540dba900fef2b9edf7e2b6c65eac44	11431747		Evolution	AAGGTTAGGATGTATGTGGG	2223	2242	2233	1.5064	ATT GAG GAC CAC CAG GTT CT	2587	2606	2597	1.7896	384
Ref100	Gimenez-Barcons M., Franco S., Suarez Y., Forns X., Ampurdanes S., Puig-Basagoiti F., Sanchez-Fueyo A., Barrera J.-M., Llovet J.-M., Bruix J., Sanchez-Tapias J.-M., Rodes J., Saiz J.-C.	High amino acid variability within the NS5A of hepatitis C virus (HCV) is associated with hepatocellular carcinoma in patients with HCV-1b-related cirrhosis	2001	Hepatology	34	1	158	http://www.scopus.com/inward/record.url?eid=2-s2.0-0034961822&partnerID=40&md5=6540dba900fef2b9edf7e2b6c65eac44	11431747		Evolution	GATGTCGTTGTCGTGGCAAC	4632	4651	4642	1.4092	TGAGTGAGGCCTGTGAAGAC	5022	5041	5032	1.75	410
Ref102	Gonzalez-Candelas F., Guiral S., Carba R., Valero A., Vanaclocha H., Gonzalez F., Bracho M.A.	Patient-to-patient transmission of hepatitis C virus (HCV) during colonoscopy diagnosis	2010	Virology Journal	7			http://www.scopus.com/inward/record.url?eid=2-s2.0-77956835308&partnerID=40&md5=44ade8df0ccd3ebe01adcdcdef5ae339	20825635	[Ref477]	Clustering/transmission	GGGATATGATRATGAAYTGGTC	1300	1321	1311	1.694	GGGGTGAARCARTAYACYGG	1854	1874	1865	1.5156	575
Ref102	Gonzalez-Candelas F., Guiral S., Carba R., Valero A., Vanaclocha H., Gonzalez F., Bracho M.A.	Patient-to-patient transmission of hepatitis C virus (HCV) during colonoscopy diagnosis	2010	Virology Journal	7			http://www.scopus.com/inward/record.url?eid=2-s2.0-77956835308&partnerID=40&md5=44ade8df0ccd3ebe01adcdcdef5ae339	20825635	[Ref477]	Clustering/transmission	TATGATACYCGCTGYTTYGACTC	8256	8278	8268	1.8172	GTACCTRGTCATAGCCTCCGTGAA	8616	8639	8628	1.5672	384
Ref103	Gretch D.R., Polyak S.J., Wilson J.J., Carithers Jr. R.L., Perkins J.D., Corey L.	Tracking hepatitis C virus quasispecies major and minor variants in symptomatic and asymptomatic liver transplant recipients	1996	Journal of Virology	70	11	7622	http://www.scopus.com/inward/record.url?eid=2-s2.0-0029842879&partnerID=40&md5=ade8d3b3e2b4ab6e4c9a5013ae8d39b5	8892882	[Ref419]	Evolution	GCAATTTGGGTAAGGTCATCGATACCCTTACG	691	722	707	1.4712	AGCCGGTGTTGAGGCTATCATTGCAGTTC	1622	1650	1637	1.876	960
Ref105	Halfon P., Ouzan D., Khiri H., Feryn J.M., Desmorat H., Bourliere M., Boyer N., Fontanges T., Mathieu-Chandelier C., Jacques J.P., Baesjour S., Rouhier D., Louvet H., Hanslik B., Beorchia S., Antoni M., Brunerie M., Corcos D., Richard-Molard B., Pierrugues R., Caucanas J., Jouanolle H.	Serotyping and genotyping of hepatitis C virus (HCV) strains in chronic HCV infection	1997	Journal of Medical Virology	52	4	391	http://www.scopus.com/inward/record.url?eid=2-s2.0-0030845485&partnerID=40&md5=ec7ba299408d676385d6f41aaf498475	9260686	[Ref403], and [Ref395]	Genotyping/classification	AGGTCTCGTAGACCGTGCATCATG	321	344	333	1.9112	CACGTAAGGGTATCGATGAC	705	724	715	1.5424	404
Ref105	Halfon P., Ouzan D., Khiri H., Feryn J.M., Desmorat H., Bourliere M., Boyer N., Fontanges T., Mathieu-Chandelier C., Jacques J.P., Baesjour S., Rouhier D., Louvet H., Hanslik B., Beorchia S., Antoni M., Brunerie M., Corcos D., Richard-Molard B., Pierrugues R., Caucanas J., Jouanolle H.	Serotyping and genotyping of hepatitis C virus (HCV) strains in chronic HCV infection	1997	Journal of Medical Virology	52	4	391	http://www.scopus.com/inward/record.url?eid=2-s2.0-0030845485&partnerID=40&md5=ec7ba299408d676385d6f41aaf498475	9260686	[Ref403], and [Ref395]	Genotyping/classification	TGGGGATCCCGTATGATACCCGCTGCTTTGA	8245	8275	8261	1.7908	GGCGGAATTCCTGGTCATAGCCTCCGTGAA	8616	8645	8631	1.5956	401
Ref106	Halfon P., Trimoulet P., Bourliere M., Khiri H., De Ledinghen V., Couzigou P., Feryn J.M., Alcaraz P., Renou C., Fleury H.J.A., Ouzan D.	Hepatitis C virus genotyping based on 5' noncoding sequence analysis (Trugene)	2001	Journal of Clinical Microbiology	39	5	1771	http://www.scopus.com/inward/record.url?eid=2-s2.0-0035014230&partnerID=40&md5=cb1929bd07bbafb7f8017c7c33f6b1c1	11325988	TrueGene 5'NC [Ref266]	Genotyping/classification		96		49	1.9364			278	140	1.9724	183
Ref107	Hara T., Setoguchi Y., Kajihara S., Yamamoto K., Sakai T., Inoue T., Ohba K., Mizokami M.	Phylogenetic tree-based epidemiological analysis of hepatitis C virus transmission in a region of Japan with a high prevalence of infection	1996	Journal of Gastroenterology and Hepatology	11	7	641	http://www.scopus.com/inward/record.url?eid=2-s2.0-0029792423&partnerID=40&md5=c88f81606c3d4fbc2680dc3f235e222e	8840239	[Ref236] and [Ref476]	Epidemiology	GACGAATTCGACGGCGTGAACTACGCAACA	813	839	827	1.404	ATGAGATCTGTGGGAGTGAGCGCTACCCA	1056	1084	1071	1.4172	272
Ref108	Harris K.A., Teo C.G.	Diversity of hepatitis C virus quasispecies evaluated by denaturing gradient gel electrophoresis	2001	Clinical and Diagnostic Laboratory Immunology	8	1	62	http://www.scopus.com/inward/record.url?eid=2-s2.0-0035175473&partnerID=40&md5=c2e8764c1de714ffc8f2866368c81bc1	11139197	New primers, plus [Ref474], [Ref475]	Evolution	GTGGTCTGCGGAACCGG	143	159	152	1.9552	GGGCACTCGCAAGCACCC	299	316	308	1.9244	174
Ref108	Harris K.A., Teo C.G.	Diversity of hepatitis C virus quasispecies evaluated by denaturing gradient gel electrophoresis	2001	Clinical and Diagnostic Laboratory Immunology	8	1	62	http://www.scopus.com/inward/record.url?eid=2-s2.0-0035175473&partnerID=40&md5=c2e8764c1de714ffc8f2866368c81bc1	11139197	New primers, plus [Ref474], [Ref475]	Evolution	TACTACTCCATGGTGGGAGACTGGGC	1422	1447	1435	1.7724	GATGTGCCAGCTGCCATTGG	1588	1607	1598	1.4164	186
Ref108	Harris K.A., Teo C.G.	Diversity of hepatitis C virus quasispecies evaluated by denaturing gradient gel electrophoresis	2001	Clinical and Diagnostic Laboratory Immunology	8	1	62	http://www.scopus.com/inward/record.url?eid=2-s2.0-0035175473&partnerID=40&md5=c2e8764c1de714ffc8f2866368c81bc1	11139197	New primers, plus [Ref474], [Ref475]	Evolution	ATGGGGTTCTCGTATGATACCCGCTGCTTTGACTC	8244	8278	8262	1.8	GGAGGGGCGGAATACCTGGTCATAGCCTCCGTGAA	8616	8650	8634	1.5648	407
Ref109	Hashimoto M., Chayama K., Kobayashi M., Tsubota A., Arase Y., Saitoh S., Suzuki Y., Ikeda K., Matsuda M., Koike H., Kobayashi M., Handa H., Kumada H.	Fluctuations of hepatitis C virus load are not related to amino acid substitutions in hypervariable region 1 and interferon sensitivity determining region	1999	Journal of Medical Virology	58	3	247	http://www.scopus.com/inward/record.url?eid=2-s2.0-0033001641&partnerID=40&md5=e8c51ecaff0eb93715b97942559fd648	10447420	[Ref046], [Ref460]	Treatment response/resistance	CTTGGGATATGATGATGAACTGG	1297	1319	1309	1.7116	CTGTCTCATTCTCCCCCCAGCTATA	1920	1944	1933	1.4776	648
Ref109	Hashimoto M., Chayama K., Kobayashi M., Tsubota A., Arase Y., Saitoh S., Suzuki Y., Ikeda K., Matsuda M., Koike H., Kobayashi M., Handa H., Kumada H.	Fluctuations of hepatitis C virus load are not related to amino acid substitutions in hypervariable region 1 and interferon sensitivity determining region	1999	Journal of Medical Virology	58	3	247	http://www.scopus.com/inward/record.url?eid=2-s2.0-0033001641&partnerID=40&md5=e8c51ecaff0eb93715b97942559fd648	10447420	[Ref046], [Ref460]	Treatment response/resistance	GGGTCACAGCTCCCATGTGAGCC	6810	6832	6822	1.4824	GAGGGTTGTAATCCGGGCGTGC	7206	7227	7217	1.754	418
Ref110	Haushofer A.C., Berg J., Hauer R., Trubert-Exinger D., Stekel H.G., Kessler H.H.	Genotyping of hepatitis C virus - Comparison of three assays	2003	Journal of Clinical Virology	27	3	276	http://www.scopus.com/inward/record.url?eid=2-s2.0-0037812298&partnerID=40&md5=0dc69a790734cd7fcbac91c3dd826252	12878092	TrueGene 5'NC [Ref266]	Genotyping/classification		96						278	140	1.9724	183
Ref111	Hayashi J., Kishihara Y., Yamaji K., Furusyo N., Yamamoto T., Pae Y., Etoh Y., Ikematsu H., Kashiwagi S.	Hepatitis C viral quasispecies and liver damage in patients with chronic hepatitis C virus infection	1997	Hepatology	25	3	697	http://www.scopus.com/inward/record.url?eid=2-s2.0-0031043398&partnerID=40&md5=39343d81b23e589c65cb5230291c8d69	9049221		Evolution	510	510		256	1.9444	719		719	360	1.8204	210
Ref112	Herring B.L., Page-Shafer K., Tobler L.H., Delwart E.L.	Frequent hepatitis C virus superinfection in injection drug users	2004	Journal of Infectious Diseases	190	8	1396	http://www.scopus.com/inward/record.url?eid=2-s2.0-5044231051&partnerID=40&md5=51f24bd08ebb054144bf6167aeb38aef	15378431		Genotyping/classification	TTCCATGGTGGGGAACTGGGC	1427	1447	1438	1.7992	CATCCABGTRCCAVCCRAACC	4733	4754	4744	1.6972	3328
Ref112	Herring B.L., Page-Shafer K., Tobler L.H., Delwart E.L.	Frequent hepatitis C virus superinfection in injection drug users	2004	Journal of Infectious Diseases	190	8	1396	http://www.scopus.com/inward/record.url?eid=2-s2.0-5044231051&partnerID=40&md5=51f24bd08ebb054144bf6167aeb38aef	15378431		Genotyping/classification	CTCAACCGTCACTGAACAGGACAT	8276	8299	8288	1.7992	CCATGGAGTCTTTCAATGATTG	8983	9004	8994	1.6396	729
Ref113	Hijikata M., Mizuno K., Rikihisa T., Shimizu Y.K., Iwamoto A., Nakajima N., Yoshikura H.	Selective transmission of hepatitis C virus in vivo and in vitro	1995	Archives of Virology	140	9	1623	http://www.scopus.com/inward/record.url?eid=2-s2.0-0028797539&partnerID=40&md5=e48a6f85c7a8ed0ebe3f46cd87db4f02	7487493	[Ref506]	Clustering/transmission	TCCATGGTGGGGAACTGGGC	1428	1447	1438	1.7992	CGCAGTCCTGTTGATGTGCCA	1599	1619	1610	1.52	192
Ref114	Hino K., Yamaguchi Y., Fujiwara D., Katoh Y., Korenaga M., Okazaki M., Okuda M., Okita K., Kawamura S., Ariyama S., Tanabe M., Inamoto Y., Murakami A., Nishimura S., Harada T., Fukumoto Y., Kajii N., Hirado H., Mizumachi S., Yamasaki T., Andoh K., Esaki T., Harada Y., Sanuki K., Terai K., Inoue M., Shigeta K., Kubo Y., Konishi T.	Hepatitis C virus quasispecies and response to interferon therapy in patients with chronic hepatitis C: A prospective study	2000	Journal of Viral Hepatitis	7	1	36	http://www.scopus.com/inward/record.url?eid=2-s2.0-0034056076&partnerID=40&md5=958f4c9e791cce327fca7267cc2d9944	10718941		Treatment response/resistance	TACTACTCCATGGTGGGAGACTGGGC	1422	1447	1435	1.7724	GATGTGCCAGCTGCCATTGG	1588	1607	1598	1.4164	186
Ref115	Hofgartner W.T., Polyak S.J., Sullivan D.G., Carithers Jr. R.L., Gretch D.R.	Mutations in the NS5A gene of hepatitis C virus in North American patients infected with HCV genotype 1a or 1b	1997	Journal of Medical Virology	53	2	118	http://www.scopus.com/inward/record.url?eid=2-s2.0-1842327408&partnerID=40&md5=e1f1f759e7a9e08ee0b24775b7195ff4	9334922		Evolution	CCTCCCATATAACAGCAGAG	6874	6893	6884	1.5072	CGAAGGAGTCCAGAATCACC	7091	7110	7101	1.8444	237
Ref116	Hohne M., Schreier E., Roggendorf M.	Sequence variability in the env-coding region of hepatitis C virus isolated from patients infected during a single source outbreak	1994	Archives of Virology	137	2011-01-02	25	http://www.scopus.com/inward/record.url?eid=2-s2.0-0028002086&partnerID=40&md5=b90386b33c6bf9b73823ef111c0cc1c0	7979995		Evolution	TGCTCTTTCTCTATCTTCCT	855	874	865	1.4068	TTGCAGTTCAGGGCAGTCCTGTTGATGTGCCA	1599	1630	1615	1.5996	776
Ref116	Hohne M., Schreier E., Roggendorf M.	Sequence variability in the env-coding region of hepatitis C virus isolated from patients infected during a single source outbreak	1994	Archives of Virology	137	2011-01-02	25	http://www.scopus.com/inward/record.url?eid=2-s2.0-0028002086&partnerID=40&md5=b90386b33c6bf9b73823ef111c0cc1c0	7979995		evolution	TCCATGGTGGGGAACTGGGC	1428	1447	1438	1.7992	TTGAACTTGTGGTGATAGAA	1665	1684	1675	1.6848	257
Ref117	Holland P.V., Barrera J.M., Ercilla M.G., Yoshida C.F.T., Wang Y., De Olim G.A.B., Betlach B., Kuramoto K., Okamoto H.	Genotyping hepatitis C virus isolates from Spain, Brazil, China, and Macau by a simplified PCR method	1996	Journal of Clinical Microbiology	34	10	2372	http://www.scopus.com/inward/record.url?eid=2-s2.0-0029821097&partnerID=40&md5=5cf50232eb76225b64a295ee1d9a8987	8880482		Genotyping/classification	ACCCGCTGTTTTGACTCNAC	8262	8281	8272	1.8464	CATAGGCTGCGTGAAGGCTC	8611	8630	8621	1.6928	369
Ref118	Horie C., Iwahana H., Horie T., Shimizu I., Yoshimoto K., Yogita S., Tashiro S., Ito S., Itakura M.	Detection of different quasispecies of hepatitis C virus core region in cancerous and noncancerous lesions	1996	Biochemical and Biophysical Research Communications	218	3	674	http://www.scopus.com/inward/record.url?eid=2-s2.0-0030051841&partnerID=40&md5=1ec79cd9046ae5db1165701ff1239953	8579573		Natural history	CTAGAACTAGTGGCCCACAGGACGTCAAGTTC	383	413	399	1.93	GATATCGAATTCTGCCATAGAGGGGCCAAGGG	584	613	599	1.7976	231
Ref119	Horiike N., Michitaka K., Masumoto T., Okura I., Akbar S.M.F., Onji M.	Relationship between the effect of interferon therapy and the change of hepatitis C virus non-structural 5B gene	1999	Journal of Gastroenterology and Hepatology	14	4	345	http://www.scopus.com/inward/record.url?eid=2-s2.0-0033379678&partnerID=40&md5=70330b20427a84cced48803a791f7d9a	10207784	[Ref441]	Treatment response/resistance	CAGGTACGCTCCGGCGTGCA	4948	4968	4959	1.7124	GGGGCCTTGGTAGGTGGCAA	7287	7305	7297	1.754	2358
Ref119	Horiike N., Michitaka K., Masumoto T., Okura I., Akbar S.M.F., Onji M.	Relationship between the effect of interferon therapy and the change of hepatitis C virus non-structural 5B gene	1999	Journal of Gastroenterology and Hepatology	14	4	345	http://www.scopus.com/inward/record.url?eid=2-s2.0-0033379678&partnerID=40&md5=70330b20427a84cced48803a791f7d9a	10207784		Treatment response/resistance	GACATCAGGACTGAGGAATC	8295	8314	8305	1.7804	TACCTAGTCATAGCCTCCGTG	8618	8638	8629	1.5672	344
Ref120	Hoshida Y., Kato N., Yoshida H., Wang Y., Tanaka M., Goto T., Otsuka M., Taniguchi H., Moriyama M., Imazeki F., Yokosuka O., Kawabe T., Shiratori Y., Omata M.	Hepatitis C virus core protein and hepatitis activity are associated through transactivation of interleukin-8	2005	Journal of Infectious Diseases	192	2	266	http://www.scopus.com/inward/record.url?eid=2-s2.0-22244440751&partnerID=40&md5=a4217ff344e83b0d0034032677d47f7e	15962221		Natural history	TCAGCCCGGGTACCCTTGGCCCC	572	594	584	1.736	GTATCGATGACCTTACCCA	697	715	707	1.4712	144
Ref121	Hosoda K., Omata M., Yokosuka O., Kato N., Ohto M.	Non-A, non-B chronic hepatitis is chronic hepatitis C: A sensitive assay for detection of hepatitis C virus RNA in the liver	1992	Hepatology	15	5	777	http://www.scopus.com/inward/record.url?eid=2-s2.0-0026528427&partnerID=40&md5=cc6d27c4476c8dbb38a44e57269cd37f	1314769		Genotyping/classification	TCTAGCCATGGCGTTAGTAT	78	97	88	1.942	TCCAAGAAAGGACCCGGTCG	183	202	193	1.8672	125
Ref121	Hosoda K., Omata M., Yokosuka O., Kato N., Ohto M.	Non-A, non-B chronic hepatitis is chronic hepatitis C: A sensitive assay for detection of hepatitis C virus RNA in the liver	1992	Hepatology	15	5	777	http://www.scopus.com/inward/record.url?eid=2-s2.0-0026528427&partnerID=40&md5=cc6d27c4476c8dbb38a44e57269cd37f	1314769		Genotyping/classification	AAGCCCACCCTCCATGGGCC	5184	5203	5194	1.7692	TTTGGTGACTGGGTGCGTCA	5251	5270	5261	1.6708	87
Ref122	Hosokawa, Esumi, Iwasaki, Yanai, Enomoto, Kawano	Phylogenetic evidence, by multiple clone analysis of hypervariable region 1, for the transmission of hepatitis C virus to chronic haemodialysis patients	2000	Journal of Viral Hepatitis	7	4	276	http://www.scopus.com/inward/record.url?eid=2-s2.0-0033910671&partnerID=40&md5=8c30f075471f92c8dcbbb1ebf7731ebe	10886536	[Ref203]	Clustering/transmission	CATGGCGGGGAACTGGGCTAAGGT	1430	1453	1442	1.8128	CAGGGCAGTCCTGTTGATGTGCCA	1599	1622	1611	1.4708	193
Ref123	Hsu C.-W., Yeh C.-T., Chen P.G.-C., Liaw Y.-F.	Replication of hepatitis C virus in ascitic mononuclear cells with development of distinct viral quasispecies	1999	Journal of Infectious Diseases	180	4	992	http://www.scopus.com/inward/record.url?eid=2-s2.0-0033383717&partnerID=40&md5=621ed49094c780347dd250cfa3e151db	10479123		Clustering/transmission	ATGGTGGGGAACTGGGCTAAG	1431	1451	1442	1.8128	GGTGAAGCAATACACCGGACC	1851	1871	1862	1.5572	441
Ref125	Hu Y.-W., Balaskas E., Furione M., Yen P.-H., Kessler G., Scalia V., Chui L., Sher G.	Comparison and application of a novel genotyping method, semiautomated primer-specific and mispair extension analysis, and four other genotyping assays for detection of hepatitis C virus mixed-genotype infections	2000	Journal of Clinical Microbiology	38	8	2807	http://www.scopus.com/inward/record.url?eid=2-s2.0-0033883640&partnerID=40&md5=3422511a51b6b3212e7d520b07aa3943	10921931		Genotyping/classification	TCTAGCCATGGCGTTAGTATGAGTGT	78	103	91	1.9452	CTCGCAAGCACCCTATCAGG	292	311	302	1.9256	234
Ref126	Idrees M.	Development of an improved genotyping assay for the detection of hepatitis C virus genotypes and subtypes in Pakistan	2008	Journal of Virological Methods	150	2011-01-02	50	http://www.scopus.com/inward/record.url?eid=2-s2.0-43049089125&partnerID=40&md5=d92a7cd77fde732e5b782c5b64c56b48	18423633		Genotyping/classification	TTGTGGTACTGCCTGATAGGG	281	301	292	1.9572	GGATGTACCCCATGAGGTCG	734	753	744	1.5304	473
Ref127	Idrees M., Butt S., Awan Z., Aftab M., Khubaib B., Rehman I.-U., Akram M., Manzoor S., Akbar H., Rafiqe S., Riazuddin S.	Nucleotide identity and variability among different Pakistani hepatitis C virus isolates	2009	Virology Journal	6			http://www.scopus.com/inward/record.url?eid=2-s2.0-69949180644&partnerID=40&md5=a03eb21821c0a4a99289dd0774dc13ce	19698187	[Ref507]	Evolution	TTGTGGTACTGCCTGATAGGG	281	301	292	1.9572	GGATGTACCCCATGAGGTCG	734	753	744	1.5304	473
Ref128	Iijima A, Tanaka E, Kobayashi M, Yagi S, Mizokami M, Kiyosawa K.	Relationship between histological prognosis of chronic hepatitis C and amount of hepatitis C virus core protein in serum.	2000	J Gastroenterol Hepatol	15	3	311	/pubmed/10764034	10764034	[Ref469]	Evolution	TCTGGATCCTATTCCATGGTGGGGAACTGG	1416	1415	1416	1.6844	AATGAATTCTACAACAGGGCTKGGRGTGAA	1866	1895	1881	1.462	480
Ref130	Inoue Y., Sulaiman H.A., Matsubayashi K., Julitasari, Iinuma K., Ansari A., Laras K., Corwin A.L.	Genotypic analysis of hepatitis C virus in blood donors in Indonesia	2000	American Journal of Tropical Medicine and Hygiene	62	1	92	http://www.scopus.com/inward/record.url?eid=2-s2.0-0034071646&partnerID=40&md5=0fc5574ce488f05e666692cb22e01e74	10761731	[Ref232]	Epidemiology	AGACCGTGCACCATGAGCAC	330	349	340	1.8664	TACGCCGGGGGTCATTGGGGCCCCA	660	684	673	1.6404	355
Ref131	Irish D.N., Blake C., Christophers J., Craske J.E., Burnapp L., Abbs I.C., MacMahon E.M.E., Muir P., Banatvala J.E., Simmonds P.	Identification of hepatitis C virus seroconversion resulting from nosocomial transmission on a haemodialysis unit: Implications for infection control and laboratory screening	1999	Journal of Medical Virology	59	2	135	http://www.scopus.com/inward/record.url?eid=2-s2.0-0032817773&partnerID=40&md5=f4a511a32be0f86d5abc385f8e9ea71d	10459146	[Ref468]	Clustering/transmission	7941	7941		3971	1.8384			8267	4134	1.8192	327
Ref132	Isaguliants M.G., Widell A., Zhang S.M., Sidorchuk A., Levi M., Smirnov V.D., Santantonio T., Diepolder H.M., Pape G.R., Nordenfelt E.	Antibody responses against B-cell epitopes of the hypervariable region 1 of hepatitis C virus in self-limiting and chronic human hepatitis C followed-up using consensus peptides	2002	Journal of Medical Virology	66	2	204	http://www.scopus.com/inward/record.url?eid=2-s2.0-0036137073&partnerID=40&md5=bbf3eac02ed76a30f1298a2fb6b9530f	11782929	[Ref355] and [Ref356]	Natural history	TAGATTGGGTGTGCGCGCGA	467	486	477	1.92208	AGGTTCCCTGTTGCATAATT	828	847	838	1.452	381
Ref133	Ishii T., Ohto H., Takeuchi C., Ariga H., Hirai S., Ujiie N., Suzuki H., Okamoto H.	Evolution in the hypervariable region of the hepatitis C virus in two infants infected by mother-to-infant transmission	2005	Pediatrics International	47	3	278	http://www.scopus.com/inward/record.url?eid=2-s2.0-20444440720&partnerID=40&md5=3c155d01c5c3a1d2826c6e8f4beac343	15910451	[Ref424]	Evolution	GGGACATGATGATCAACTGG	1300	1319	1310	1.7108	GBGAAGGAATTCACTGGGCCACA	1848	1870	1860	1.5648	571
Ref134	Iwai A., Marusawa H., Takada Y., Egawa H., Ikeda K., Nabeshima M., Uemoto S., Chiba T.	Identification of novel defective HCV clones in liver transplant recipients with recurrent HCV infection	2006	Journal of Viral Hepatitis	13	8	523	http://www.scopus.com/inward/record.url?eid=2-s2.0-33746267146&partnerID=40&md5=b68fef534ddfa03b1528a2ad539f26d6	16901282		Natural history	CGCCGACCTCATGGGGTACA	731	750	741	1.592	TGGTGTACATTTGGGTGATT	3629	3648	3639	1.798	2918
Ref135	Jang S.J., Wang L.-F., Radkowski M., Rakela J., Laskus T.	Differences between hepatitis C virus 5' untranslated region quasispecies in serum and liver	1999	Journal of General Virology	80	3	711	http://www.scopus.com/inward/record.url?eid=2-s2.0-0033031389&partnerID=40&md5=d06aec05aeb56cd35b22837984a947da	10092011	[Ref457], [Ref458]	Evolution	ACTGTCTTCACGCAGAAAGCGTC	57	79	69	1.9564	CAAGCACCCTATCAGGCAGTACC	285	307	297	1.9668	251
Ref135	Jang S.J., Wang L.-F., Radkowski M., Rakela J., Laskus T.	Differences between hepatitis C virus 5' untranslated region quasispecies in serum and liver	1999	Journal of General Virology	80	3	711	http://www.scopus.com/inward/record.url?eid=2-s2.0-0033031389&partnerID=40&md5=d06aec05aeb56cd35b22837984a947da	10092011	[Ref457], [Ref458]	Evolution	TGGGGATCCCGTATGATACCCGCTGCTTTGA	8245	8275	8261	1.7908	GGCGGAATTCCTGGTCATAGCCTCCGTGAA	8616	8645	8631	1.5956	401
Ref136	Jia L., Yu J., Song H., Yang J., Song H., Liu X., Wang Y., Xu Y., Zhang C., Zhong Y., Li Q.	HCV antibody response and genotype distribution in different areas and races of China	2009	International Journal of Biological Sciences	5	5	421	http://www.scopus.com/inward/record.url?eid=2-s2.0-70249086307&partnerID=40&md5=cb064be8bee6db05407b03c6db44903d	19564925	[Ref236]	Epidemiology	TAGATTGGGTGTGCGCGCGA	467	486	477	1.92208	AGGTTCCCTGTTGCATAATT	828	847	838	1.452	381
Ref137	Jimenez-Hernandez N., Torres-Puente M., Bracho M.A., Garcia-Robles I., Ortega E., del Olmo J., Carnicer F., Gonzales-Candelas F., Moya A.	Epidemic dynamics of two coexisting hepatitis C virus subtypes	2007	Journal of General Virology	88	1	123	http://www.scopus.com/inward/record.url?eid=2-s2.0-33846155234&partnerID=40&md5=33d87e9c610c66ce32e40329ce59d503	17170444	[Ref467]	Evolution	GGRATATGATGATGAACTGGTC	1300	1321	1311	1.694	GGAGTGAAGCARTATACTGG	1854	1873	1864	1.5528	574
Ref137	Jimenez-Hernandez N., Torres-Puente M., Bracho M.A., Garcia-Robles I., Ortega E., del Olmo J., Carnicer F., Gonzales-Candelas F., Moya A.	Epidemic dynamics of two coexisting hepatitis C virus subtypes	2007	Journal of General Virology	88	1	123	http://www.scopus.com/inward/record.url?eid=2-s2.0-33846155234&partnerID=40&md5=33d87e9c610c66ce32e40329ce59d503	17170444	[Ref467]	Evolution	TAGGTWYGCSCCCCCYTGCA	6734	6753	6744	1.554	CCCTCSAGRGGGGGCAT	7503	7519	7512	1.2296	786
Ref138	Johansson B., Yun Z.-B., Sonnerborg A.	Variability of the E2/NS1 region of Swedish hepatitis C virus strains and its correlation to genotypes	1994	Scandinavian Journal of Infectious Diseases	26	3	255	http://www.scopus.com/inward/record.url?eid=2-s2.0-0028270962&partnerID=40&md5=60e51ecbaa918ef1b62b13d6dfcba5fe	7939424	[Ref465]	Evolution	TCTCCATGGTGGGGAACTGG	1426	1445	1436	1.8068	GGGCTGGGAGTGAAGCAATA	1860	1879	1870	1.5284	454
Ref139	Kalinina O., Norder H., Mukomolov S., Magnius L.O.	A natural intergenotypic recombinant of hepatitis C virus identified in St. Petersburg	2002	Journal of Virology	76	8	4034	http://www.scopus.com/inward/record.url?eid=2-s2.0-0036196640&partnerID=40&md5=ff8a0f919fa3d8f9fd076789951dff5a	11907242	New primers, plus [Ref226]	Genotyping/classification	CCCTGTGAGGAACTWCTGTCTTCACGC	43	69	57	1.94	ATGTACCCCATGAGGTCGGC	732	751	742	1.5604	709
Ref139	Kalinina O., Norder H., Mukomolov S., Magnius L.O.	A natural intergenotypic recombinant of hepatitis C virus identified in St. Petersburg	2002	Journal of Virology	76	8	4034	http://www.scopus.com/inward/record.url?eid=2-s2.0-0036196640&partnerID=40&md5=ff8a0f919fa3d8f9fd076789951dff5a	11907242	New primers, plus [Ref226]	Genotyping/classification		342						3741			3400
Ref139	Kalinina O., Norder H., Mukomolov S., Magnius L.O.	A natural intergenotypic recombinant of hepatitis C virus identified in St. Petersburg	2002	Journal of Virology	76	8	4034	http://www.scopus.com/inward/record.url?eid=2-s2.0-0036196640&partnerID=40&md5=ff8a0f919fa3d8f9fd076789951dff5a	11907242	New primers, plus [Ref226]	Genotyping/classification	GCTCNTAYGGRTTYCARTACTC	8167	8188	8178	1.8352	ATACCTAGTCATAGCCTCCGTGA	8617	8639	8629	1.5672	473
Ref140	Kamili S, Krawczynski K, McCaustland K, Li X, Alter MJ.	Infectivity of hepatitis C virus in plasma after drying and storing at room temperature.	2007	Infect Control Hosp Epidemiol	28	5	519	/pubmed/17464909	17464909		evolution	GGTCACCGCATGGCATGGGATATGATGAT	1284	1312	1299	1.7908	GGTCACCGCATGGCATGGGATATGATGAT	1848	1876	1863	1.5544	593
Ref141	Kao J.-H., Chen P.-J., Lai M.-Y., Wang T.-H., Chen D.-S.	Quasispecies of hepatitis C virus and genetic drift of the hypervariable region in chronic type C hepatitis	1995	Journal of Infectious Diseases	172	1	261	http://www.scopus.com/inward/record.url?eid=2-s2.0-0029024922&partnerID=40&md5=9e9fdc64dead1af8d6928855ac97889a	7797927		evolution	CACTGGGGAGTCCTGGCGGG	1395	1414	1405	1.7092	ATGTGCCAGCTGCCATTGGT	1587	1606	1597	1.3968	212
Ref142	Karachristos A., Linardopoulos S., Ergazaki M., Spandidos D.A.	Detection and analysis of hepatitis C virus by a combined RT-PCR method: Variation in the 5' non-coding region of the viral genome	1995	Journal of Medical Microbiology	42	5	367	http://www.scopus.com/inward/record.url?eid=2-s2.0-0029034970&partnerID=40&md5=3b6b9dfe053ee8a26d360ce741237197	7752217		evolution	ACGCAGAAAGCGTCTAGCCATGGCGTTAGT	66	95	81	1.956	TCCCGGGGCACTCGCAAGCACCCTATCAGG	292	321	307	1.926	256
Ref143	Kato N., Ikeda M., Sugiyama K., Mizutani T., Tanaka T., Shimotohno K.	Hepatitis C virus population dynamics in human lymphocytes and hepatocytes infected in vitro	1998	Journal of General Virology	79	8	1859	http://www.scopus.com/inward/record.url?eid=2-s2.0-0031821747&partnerID=40&md5=04faf7a020eec464493db2bdbb95180b	9714233		Evolution	CAGAGGTGAGAATTCCTGTGAGGAACTACTGTCTTCACGC	28	69	49	1.9364	CAGAGGTGAGAATTCTCGGCTGGTCCCAGGAGTATCTC	3366	3405	3386	1.81	3378
Ref143	Kato N., Ikeda M., Sugiyama K., Mizutani T., Tanaka T., Shimotohno K.	Hepatitis C virus population dynamics in human lymphocytes and hepatocytes infected in vitro	1998	Journal of General Virology	79	8	1859	http://www.scopus.com/inward/record.url?eid=2-s2.0-0031821747&partnerID=40&md5=04faf7a020eec464493db2bdbb95180b	9714233		evolution	CGAGCCTTGGGATCCACTATTCCATGGTGGGGAACTGG	1411	1445	1429	1.7512	CAGAGGTGAGAATTCCTGTTGATGTGCCAGCTGCC	1593	1627	1611	1.4708	217
Ref144	Kato N., Ootsuyama Y., Ohkoshi S., Nakazawa T., Mori S., Hijikata M., Shimotohno K.	Distribution of plural HCV types in Japan	1991	Biochemical and Biophysical Research Communications	181	1	279	http://www.scopus.com/inward/record.url?eid=2-s2.0-0026355306&partnerID=40&md5=8c3e9b8218a76865dbaf54663288948f	1720309		Epidemiology	AGATCATGACGAGCACCTGG	5302	5321	5312	1.768	CCATCTCATCAAAGGCCTCA	5447	5466	5457	1.7168	165
Ref144	Kato N., Ootsuyama Y., Ohkoshi S., Nakazawa T., Mori S., Hijikata M., Shimotohno K.	Distribution of plural HCV types in Japan	1991	Biochemical and Biophysical Research Communications	181	1	279	http://www.scopus.com/inward/record.url?eid=2-s2.0-0026355306&partnerID=40&md5=8c3e9b8218a76865dbaf54663288948f	1720309		Epidemiology	CGACATCCGTACGGAGGAGG	8294	8313	8304	1.7808	GTGATGGTGTTCCCCATGCT	8463	8483	8474	1.5388	190
Ref145	Kato T., Furusaka A., Miyamoto M., Date T., Yasui K., Hiramoto J., Nagayama K., Tanaka T., Wakita T.	Sequence analysis of hepatitis C virus isolated from a fulminant hepatitis patient	2001	Journal of Medical Virology	64	3	334	http://www.scopus.com/inward/record.url?eid=2-s2.0-0034972539&partnerID=40&md5=a1839c758c4fae0d685ee525d69e499c	11424123		Natural history	5'Race	1				PolyA primer		9646			9646
Ref146	Kato T., Mizokami M., Nakano T., Orito E., Ohba K.-I., Kondo Y., Tanaka Y., Ueda R., Mukaide M., Fujita K., Yasuda K., Iino S.	Heterogeneity in E2 region of GBV-C/hepatitis G virus and hepatitis C virus	1998	Journal of Medical Virology	55	2	109	http://www.scopus.com/inward/record.url?eid=2-s2.0-0031895013&partnerID=40&md5=6b32063ed16ac9b6a46088e5a2108c8b	9598930		Evolution	TTGGGATATGATGATGAACTGG	1298	1319	1309	1.7116	CTGTTGATGTGCCAGCTGCC	1593	1612	1603	1.4188	315
Ref147	Khan A., Kurbanov F., Tanaka Y., Elkady A., Sugiyama M., Dustov A., Mizokami M.	Epidemiological and clinical evaluation of hepatitis B, hepatitis C, and delta hepatitis viruses in Tajikistan	2008	Journal of Medical Virology	80	2	268	http://www.scopus.com/inward/record.url?eid=2-s2.0-37549064779&partnerID=40&md5=49c48fd352eae4d0ebe343f2d67a7545	18098133	[Ref464], [Ref232], and [Ref459]	Epidemiology	GCACGAATCCTAAACCTCAAAGAAAAAC	346	373	360	1.8204	GAAGCAATAYACYGGRCCACA	1848	1868	1859	1.5684	1523
Ref147	Khan A., Kurbanov F., Tanaka Y., Elkady A., Sugiyama M., Dustov A., Mizokami M.	Epidemiological and clinical evaluation of hepatitis B, hepatitis C, and delta hepatitis viruses in Tajikistan	2008	Journal of Medical Virology	80	2	268	http://www.scopus.com/inward/record.url?eid=2-s2.0-37549064779&partnerID=40&md5=49c48fd352eae4d0ebe343f2d67a7545	18098133	[Ref464], [Ref232], and [Ref459]	Epidemiology		2986						3270			285
Ref147	Khan A., Kurbanov F., Tanaka Y., Elkady A., Sugiyama M., Dustov A., Mizokami M.	Epidemiological and clinical evaluation of hepatitis B, hepatitis C, and delta hepatitis viruses in Tajikistan	2008	Journal of Medical Virology	80	2	268	http://www.scopus.com/inward/record.url?eid=2-s2.0-37549064779&partnerID=40&md5=49c48fd352eae4d0ebe343f2d67a7545	18098133	[Ref464], [Ref232], and [Ref459]	Epidemiology	TGATACCCGCTGYTTTGACTC	8258	8278	8269	1.8316	GTACCTGGTCATAGCCTCCGTG	8618	8639	8629	1.5672	382
Ref148	Khan R.U., Tong C.Y.W., Bloom S., Gilmore I.T., Toh C.H., Bolton-Maggs P.H., Beeching N.J., Hart C.A.	Evaluation of two simplified methods for genotyping hepatitis C virus	1997	Journal of Medical Virology	52	1	35	http://www.scopus.com/inward/record.url?eid=2-s2.0-0030906629&partnerID=40&md5=a012387a83205e6298a5b017b863b04b	9131456	[Ref463]	Genotyping/classification	TTCACGCAGAAAGCGTCTAG	63	82	73	1.9576	CACTCTCGAGCACCCTATCAGGCAGT	288	313	301	1.9248	251
Ref149	Khattab E., Chemin I., Vuillermoz I., Vieux C., Mrani S., Guillaud O., Trepo C., Zoulim F.	Analysis of HCV co-infection with occult hepatitis B virus in patients undergoing IFN therapy	2005	Journal of Clinical Virology	33	2	150	http://www.scopus.com/inward/record.url?eid=2-s2.0-19444379055&partnerID=40&md5=92fabab3d7e291ee1a2069327000240f	15911431	[Ref462]	Genotyping/classification		22	49	36	1.8216		910	938	925	1.2548	917
Ref150	Kim C.-J., Shin K.-S., Kim W.-Y., Lim D.-S., Yoon S.-K., Park Y.-M., Kim B.-S., Jang S.-K., Cho M.-J.	Genotype distribution and comparison of the putative envelope region of hepatitis C virus from Korean patients	1995	Journal of Medical Virology	46	4	380	http://www.scopus.com/inward/record.url?eid=2-s2.0-0029161666&partnerID=40&md5=17cfee9ef4f4716ea14a7a0fd5ae7180	7595417		Epidemiology	ATCCCATGGTGGGGAACTGG	1425	1445	1436	1.8068	GGGTAGTGCCAGCAATACGG	1791	1810	1801	1.5316	386
Ref151	Kim Y.J., Kim S.-O., Chung H.J., Jee M.S., Kim B.G., Kim K.M., Yoon J.-H., Lee H.-S., Kim C.Y., Kim S., Yoo W., Hong S.P.	Population genotyping of hepatitis C virus by matrix-assisted laser desorption/ionization time-of-flight mass spectrometry analysis of short DNA fragments	2005	Clinical Chemistry	51	7	1123	http://www.scopus.com/inward/record.url?eid=2-s2.0-23444455496&partnerID=40&md5=c3dac8caaf59479abc72c556dbd40c29	15890891		Genotyping/classification	GCAGAAAGCGTCTAGCCATGGCGT	68	91	80	1.9556	CTCGCAAGCACCCTATCAGGCAGT	288	311	300	1.926	244
Ref152	Kimura Y., Hayashida K., Ishibashi H., Niho Y., Yanagi Y.	Antibody-free virion titer greatly differs between hepatitis C virus genotypes	2000	Journal of Medical Virology	61	1	37	http://www.scopus.com/inward/record.url?eid=2-s2.0-0034112960&partnerID=40&md5=c286ea3e70c2c3404698c8f671d32c29	10745230	[Ref461]	Natural history	GCCTTGCCTACTATTCCATG	1414	1433	1424	1.718	TTGATGTGCCAACTGCCATT	1590	1609	1600	1.3848	196
Ref153	Kobayashi M., Watanabe K., Ishigami M., Murase K., Ito H., Ukai K., Yano M., Takagi K., Hattori M., Kakumu S., Yoshioka K.	Amino acid substitutions in the nonstructural region 5A of hepatitis C virus genotypes 2a and 2b and its relation to viral load and response to interferon	2002	American Journal of Gastroenterology	97	4	988	http://www.scopus.com/inward/record.url?eid=2-s2.0-0036117777&partnerID=40&md5=ebc3a0400518527cf3dfae085bbcb814	12003437		Treatment response/resistance	AGCTCCTCAGCGAGCCAGCT	6939	6958	6949	1.7556	GAGTCCAGAACGACCACTTT	7086	7105	7096	1.8148	167
Ref154	Korenaga M., Hino K., Katoh Y., Yamaguchi Y., Okuda M., Yoshioka K., Okita K.	A possible role of hypervariable region 1 quasispecies in escape of hepatitis C virus particles from neutralization	2001	Journal of Viral Hepatitis	8	5	331	http://www.scopus.com/inward/record.url?eid=2-s2.0-0035723858&partnerID=40&md5=327221bf0f808b76c44a4e1f1cf59def	11555190	[Ref411]	Natural history	GGCCTTGCCTACTATTCCAT	1413	1432	1423	1.7108	GTCCTGTTGATGTGCCA	1599	1615	1608	1.4888	203
Ref155	Korenaga M., Hino K., Okazaki M., Okuda M., Okita K.	Differences in hypervariable region 1 quasispecies between immune complexed and non-immune complexed hepatitis C virus particles	1997	Biochemical and Biophysical Research Communications	240	3	677	http://www.scopus.com/inward/record.url?eid=2-s2.0-0031587389&partnerID=40&md5=f3b414d26ced008afc822a1d1daa020d	9398625	[Ref411]	Natural history	GGCCTTGCCTACTATTCCAT	1413	1432	1423	1.7108	GTCCTGTTGATGTGCCA	1599	1615	1608	1.4888	203
Ref156	Krekulova L., Rehak V., Riley L.W.	Hepatitis C virus (HCV) 5â€²NC sequence variants and their association with hepatitis C risk groups	2005	Journal of Clinical Virology	32	4	300	http://www.scopus.com/inward/record.url?eid=2-s2.0-15244360688&partnerID=40&md5=bc9f81addf91894bb2e41de9f2fb1bbd	15780809	[Ref157] and [Ref395]	Genotyping/classification	ACGCAGAAAGCGTCTAGCCATGGCGTTAGT	66	95	81	1.956	TCCCGGGGCACTCGCAAGCACCCTATCAGG	292	321	307	1.926	256
Ref156	Krekulova L., Rehak V., Riley L.W.	Hepatitis C virus (HCV) 5â€²NC sequence variants and their association with hepatitis C risk groups	2005	Journal of Clinical Virology	32	4	300	http://www.scopus.com/inward/record.url?eid=2-s2.0-15244360688&partnerID=40&md5=bc9f81addf91894bb2e41de9f2fb1bbd	15780809	[Ref157] and [Ref395]	Genotyping/classification	TGGGGATCCCGTATGATACCCGCTGCTTTGA	8245	8275	8261	1.7908	GGCGGAATTCCTGGTCATAGCCTCCGTGAA	8616	8645	8631	1.5956	401
Ref157	Krekulova L., Rehak V., Wakil A.E., Harris E., Riley L.W.	Nested restriction site-specific PCR to detect and type hepatitis C virus (HCV): A rapid method to distinguish HCV subtype 1b from other genotypes	2001	Journal of Clinical Microbiology	39	5	1774	http://www.scopus.com/inward/record.url?eid=2-s2.0-0035012615&partnerID=40&md5=c65f05a4b85beb0ac824babdc815dd7f	11325989	[Ref032], and [Ref395]	Genotyping/classification	ACGCAGAAAGCGTCTAGCCATGGCGTTAGT	66	95	81	1.956	TCCCGGGGCACTCGCAAGCACCCTATCAGG	292	321	307	1.926	256
Ref157	Krekulova L., Rehak V., Wakil A.E., Harris E., Riley L.W.	Nested restriction site-specific PCR to detect and type hepatitis C virus (HCV): A rapid method to distinguish HCV subtype 1b from other genotypes	2001	Journal of Clinical Microbiology	39	5	1774	http://www.scopus.com/inward/record.url?eid=2-s2.0-0035012615&partnerID=40&md5=c65f05a4b85beb0ac824babdc815dd7f	11325989	[Ref032], and [Ref395]	Genotyping/classification	TGGGGATCCCGTATGATACCCGCTGCTTTGA	8245	8275	8261	1.7908	GGCGGAATTCCTGGTCATAGCCTCCGTGAA	8616	8645	8631	1.5956	401
Ref158	Kubo Y., Takeuchi K., Boonmar S., Katayama T., Choo Q.-L., Kuo G., Weiner A.J., Bradley D.W., Houghton M., Saito I., Miyamura T.	A cDNA fragment of hepatitis C virus isolated from an implicated donor of post-transfusion non-A, non-B hepatitis in Japan	1989	Nucleic Acids Research	17	24	10367	http://www.scopus.com/inward/record.url?eid=2-s2.0-0024847558&partnerID=40&md5=fdbfac74a2ae4360e7b8331089e3fe35	2513560		Natural history	GGCTATACCGGCGACTTCGA	4668	4687	4678	1.6212	GACATGCATGTCATGATGTA	5271	5290	5281	1.76804	623
Ref159	Kudo T., Yanase Y., Ohshiro M., Yamamoto M., Morita M., Shibata M., Morishima T.	Analysis of mother-to-infant transmission of hepatitis C virus: Quasispecies nature and buoyant densities of maternal virus populations	1997	Journal of Medical Virology	51	3	225	http://www.scopus.com/inward/record.url?eid=2-s2.0-0030916108&partnerID=40&md5=4baa1939491ea6b0fd77728b8bd3718e	9139088		Clustering/transmission		1304						1853			550
Ref160	Kumagai N., Kaneko F., Tsunematsu S., Tsuchimoto K., Tada S., Saito H., Hibi T.	Complexity of the HVR-1 quasispecies and disease activity in patients with hepatitis C	2007	European Journal of Clinical Investigation	37	7	566	http://www.scopus.com/inward/record.url?eid=2-s2.0-34250316194&partnerID=40&md5=a99a34ac87495b93a4d945d41a4666f9	17576208		Natural history	TACTACTCCATGGTGGGAGAC	1422	1442	1433	1.7488	GATGTGCCAGCTGCCATTGG	1588	1607	1598	1.4164	186
Ref161	Kumagai N., Takahashi N., Kinoshita M., Tsunematsu S., Tsuchimoto K., Saito H., Ishii H.	Polymorphisms of NS5B protein relates to early clearance of hepatitis C virus by interferon plus ribavirin: A pilot study	2004	Journal of Viral Hepatitis	11	3	225	http://www.scopus.com/inward/record.url?eid=2-s2.0-2442659173&partnerID=40&md5=a4864ebde1055fad8f400da782e14306	15117324	[Ref412]	Treatment response/resistance	TCCGTGTGGRAGGACYTGCTGGARGACACT	7962	7991	7977	1.8072	GAGAAGAARTGRGTCATCARAATCAT	8868	8893	8881	1.6556	932
Ref162	Kurbanov F., Tanaka Y., Chub E., Maruyama I., Azlarova A., Kamitsukasa H., Ohno T., Bonetto S., Moreau I., Fanning L.J., Legrand-Abravane F., Izopet J., Naoumov N., Shimada T., Netesov S., Mizokami M.	Molecular epidemiology and interferon susceptibility of the natural recombinant hepatitis C virus strain RF1_2k/1b	2008	Journal of Infectious Diseases	198	10	1448	http://www.scopus.com/inward/record.url?eid=2-s2.0-54949116213&partnerID=40&md5=ba4e2b550eb2bcce786d8ed1df8dddb6	18928375	[Ref459]	Genotyping/classification	GCACGAATCCTAAACCTCAAAGAAAAAC	346	373	360	1.8204	GAAGCAATAYACYGGRCCACA	1848	1868	1859	1.5684	1523
Ref162	Kurbanov F., Tanaka Y., Chub E., Maruyama I., Azlarova A., Kamitsukasa H., Ohno T., Bonetto S., Moreau I., Fanning L.J., Legrand-Abravane F., Izopet J., Naoumov N., Shimada T., Netesov S., Mizokami M.	Molecular epidemiology and interferon susceptibility of the natural recombinant hepatitis C virus strain RF1_2k/1b	2008	Journal of Infectious Diseases	198	10	1448	http://www.scopus.com/inward/record.url?eid=2-s2.0-54949116213&partnerID=40&md5=ba4e2b550eb2bcce786d8ed1df8dddb6	18928375	[Ref459]	Genotyping/classification	TGATACCCGCTGYTTTGACTC	8258	8278	8269	1.8316	GTACCTGGTCATAGCCTCCGTG	8618	8639	8629	1.5672	382
Ref163	Kurihara C., Ishiyama N., Nishiyama Y., Fukushi S., Kageyama T., Katayama K., Miura S.	Molecular characterization of hepatitis C virus genotype 2a from the entire sequences of four isolates	2001	Journal of Medical Virology	64	4	466	http://www.scopus.com/inward/record.url?eid=2-s2.0-0034969232&partnerID=40&md5=4f9322f51fafaae6e057181f06e07376	11468731		Natural history	5'Race	1				3'Race		9577			9577
Ref164	Kurosaki M., Enomoto N., Marumo F., Sato C.	Evolution and selection of hepatitis C virus variants in patients with chronic hepatitis C	1994	Virology	205	1	161	http://www.scopus.com/inward/record.url?eid=2-s2.0-0027974113&partnerID=40&md5=b9d402977439ddcb8c7a87c35ab760eb	7975211		evolution	CTATTCCATGGTAGGGAACTGGGCTAAGGT	1424	1453	1439	1.8144	TTAGGGCGGTCCTGTTGATHTHCCA	1599	1623	1612	1.5172	200
Ref165	Kurosaki M., Enomoto N., Nouchi T., Sakuma I., Marumo F., Sato C.	Fraction-specific populations of the hypervariable region of the hepatitis C virus in a patient with cryoglobulinemia	1995	Journal of Medical Virology	46	4	403	http://www.scopus.com/inward/record.url?eid=2-s2.0-0029081335&partnerID=40&md5=3456741a1b826a25ab70614f1595937c	7595420		evolution	CTATTCCATGGTAGGGAACTGGGCTAAGGT	1424	1453	1439	1.8144	TTAGGGCGGTCCTGTTGATGTGCCA	1599	1623	1612	1.5172	200
Ref166	Lange C.M., Roomp K., Dragan A., Nattermann J., Michalk M., Spengler U., Weich V., Lengauer T., Zeuzem S., Berg T., Sarrazin C.	HLA class i allele associations with HCV genetic variants in patients with chronic HCV genotypes 1a or 1b infection	2010	Journal of Hepatology	53	6	1022	http://www.scopus.com/inward/record.url?eid=2-s2.0-78049465173&partnerID=40&md5=6de9fbcb187dac008541680790763d57	20800922		Clustering/transmission	CCAGAGCGCATGGCCAGCTG	1698	1717	1708	1.5152	CAAGGTGTTGTTGCCGACCCCCCC	2055	2078	2067	1.4904	381
Ref166	Lange C.M., Roomp K., Dragan A., Nattermann J., Michalk M., Spengler U., Weich V., Lengauer T., Zeuzem S., Berg T., Sarrazin C.	HLA class i allele associations with HCV genetic variants in patients with chronic HCV genotypes 1a or 1b infection	2010	Journal of Hepatology	53	6	1022	http://www.scopus.com/inward/record.url?eid=2-s2.0-78049465173&partnerID=40&md5=6de9fbcb187dac008541680790763d57	20800922		Clustering/transmission	GGCGTGTGGGGACATCATC	3314	3332	3324	1.7876	CATATACGCTCCAAAGCCCA	4126	4145	4136	1.8052	832
Ref166	Lange C.M., Roomp K., Dragan A., Nattermann J., Michalk M., Spengler U., Weich V., Lengauer T., Zeuzem S., Berg T., Sarrazin C.	HLA class i allele associations with HCV genetic variants in patients with chronic HCV genotypes 1a or 1b infection	2010	Journal of Hepatology	53	6	1022	http://www.scopus.com/inward/record.url?eid=2-s2.0-78049465173&partnerID=40&md5=6de9fbcb187dac008541680790763d57	20800922		Clustering/transmission	GTCACTGAGAATGACATCCG	8383	8302	8343	1.7244	TAGTCCCCGTTAYCGGTTG	9368	9388	9379	1.7084	1006
Ref167	Laperche S., Lunel F., Izopet J., Alain S., Deny P., Duverlie G., Gaudy C., Pawlotsky J.-M., Plantier J.-C., Pozzetto B., Thibault V., Tosetti F., Lefrere J.-J.	Comparison of hepatitis C virus NS5b and 5â€² noncoding gene sequencing methods in a multicenter study	2005	Journal of Clinical Microbiology	43	2	733	http://www.scopus.com/inward/record.url?eid=2-s2.0-20844441405&partnerID=40&md5=55bc1622820fe0cb5943f1addbeb9abb	15695672	[Ref414]	Genotyping/classification	TATGAYACCCGCTGYTTTGACTC	8256	8278	8268	1.8172	GCNGARTAYCTVGTCATAGCCTC	8622	8644	8634	1.5648	389
Ref168	Laskus T., Radkowski M., Wang L.-F., Jang S.J., Vargas H., Rakela J.	Hepatitis C virus quasispecies in patients infected with HIV-1: Correlation with extrahepatic viral replication	1998	Virology	248	1	164	http://www.scopus.com/inward/record.url?eid=2-s2.0-0032529690&partnerID=40&md5=2da6246dc18605d5a4e195fb8795e7a4	9705266	New PCR, plus [Ref458]	evolution	ACTGTCTTCACGCAGAAAGCGTC	57	79	69	1.9564	CAAGCACCCTATCAGGCAGTACC	285	307	297	1.9668	251
Ref168	Laskus T., Radkowski M., Wang L.-F., Jang S.J., Vargas H., Rakela J.	Hepatitis C virus quasispecies in patients infected with HIV-1: Correlation with extrahepatic viral replication	1998	Virology	248	1	164	http://www.scopus.com/inward/record.url?eid=2-s2.0-0032529690&partnerID=40&md5=2da6246dc18605d5a4e195fb8795e7a4	9705266	New PCR, plus [Ref458]	Evolution	GCTGCTCCGGATCCCACA	1349	1366	1358	1.6716	AGGCTATCATTGCAACCAG	1619	1639	1630	1.7632	291
Ref168	Laskus T., Radkowski M., Wang L.-F., Jang S.J., Vargas H., Rakela J.	Hepatitis C virus quasispecies in patients infected with HIV-1: Correlation with extrahepatic viral replication	1998	Virology	248	1	164	http://www.scopus.com/inward/record.url?eid=2-s2.0-0032529690&partnerID=40&md5=2da6246dc18605d5a4e195fb8795e7a4	9705266	New PCR, plus [Ref458]	Evolution	CTCCACAGTCACTGAGAGCGACAT	8276	8299	8288	1.7992	CGCTTTCACAGATAACGACTAAGT	8557	8580	8569	1.5864	305
Ref169	Laskus T., Wang L.-F., Radkowski M., Nowicki M., Wilkinson J., Rakela J.	Exposure of hepatitis C virus-negative recipients to â‰¥ 2 infected blood donors	2001	Journal of Infectious Diseases	183	4	666	http://www.scopus.com/inward/record.url?eid=2-s2.0-0035865787&partnerID=40&md5=7e7a6467fc3f3d402fd4893397024555	11170996		Genotyping/classification	CTCAACCGTCACTGAGARNGACAT	8276	8299	8288	1.7992	CGCTTTAGATAACGACNARGT	8557	8580	8569	1.5864	305
Ref170	Laskus T., Wang L.-F., Radkowski M., Vargas H., Nowicki M., Wilkinson J., Rakela J.	Exposure of hepatitis C virus (HCV) RNA-positive recipients to HCV RNA-positive blood donors results in rapid predominance of a single donor strain and exclusion and/or suppression of the recipient strain	2001	Journal of Virology	75	5	2059	http://www.scopus.com/inward/record.url?eid=2-s2.0-0035133576&partnerID=40&md5=71d61a11f6eb9fc88746f0a88e60a2b4	11160710	New PCR, plus [Ref415]	Natural history	GCTGCTCCGGATCCCACA	1349	1366	1358	1.6716	AGGCTATCATTGCAACCAG	1619	1639	1630	1.7632	291
Ref170	Laskus T., Wang L.-F., Radkowski M., Vargas H., Nowicki M., Wilkinson J., Rakela J.	Exposure of hepatitis C virus (HCV) RNA-positive recipients to HCV RNA-positive blood donors results in rapid predominance of a single donor strain and exclusion and/or suppression of the recipient strain	2001	Journal of Virology	75	5	2059	http://www.scopus.com/inward/record.url?eid=2-s2.0-0035133576&partnerID=40&md5=71d61a11f6eb9fc88746f0a88e60a2b4	11160710	New PCR, plus [Ref415]	evolution	CTCCACAGTCACTGAGAGCGACAT	8276	8299	8288	1.7992	CGCTTTCACAGATAACGACTAAGT	8557	8580	8569	1.5864	305
Ref171	Laughlin T.S., Nuccie B., Rothberg P.G.	Genotyping of hepatitis C virus by sequence analysis of the amplicon from the roche cobas AmpliPrep/Cobas TaqMan viral load assay	2010	Journal of Clinical Microbiology	48	2	671	http://www.scopus.com/inward/record.url?eid=2-s2.0-75649104347&partnerID=40&md5=d1869cae24041452329fcfad3bd81b0e	19955270		Genotyping/classification	AGCCATGGCGTTAGTATGAG	81	100	91	1.9452	GCAGTACCACAAGGCCTTTC	273	292	283	1.9524	212
Ref172	Lawal Z., Petrik J., Wong V.-S., Alexander G.J.M., Allain J.-P.	Hepatitis C virus genomic variability in untreated and immunosuppressed patients	1997	Virology	228	1	107	http://www.scopus.com/inward/record.url?eid=2-s2.0-0031550535&partnerID=40&md5=4e97848e8ec9728cdca511095c73c490	9024815		evolution	GGGAYATGATGATRAACTGG	1300	1319	1310	1.7108	CAGTAIACYGGRCCRCAYAC	1845	1864	1855	1.5712	565
Ref173	Lee J.-H., Stripf T., Roth W.K., Zeuzem S.	Non-isotopic detection of hepatitis C virus quasispecies by single strand conformation polymorphism	1997	Journal of Medical Virology	53	3	245	http://www.scopus.com/inward/record.url?eid=2-s2.0-0031411205&partnerID=40&md5=d38fa7c559f1665772c417c2023e0b42	9365890	[Ref386]	Genotyping/classification	GCTTGGGATATGATGATGAACTGGTC	1296	1321	1309	1.7116	TGCCACCTGCCATTGGTGTT	1584	1603	1594	1.2892	308
Ref174	Lee JH, Roth WK, Zeuzem S.	Evaluation and comparison of different hepatitis C virus genotyping and serotyping assays.	1997	J Hepatol	26	5	1001	/pubmed/9186830	9186830		Genotyping/classification	CTCAACTGTCACTGAACAGGACATCAGGGT	8276	8305	8291	1.7776	ATAGCCTCCGTGAAGGCTCTCAGGGCTCGT	8601	8629	8616	1.6416	354
Ref175	Li H., Thomassen L.V., Majid A., McMahon B.J., Bruden D., McArdle S., Bano N., Chung M., Carithers R.L., Perkins J.D., Sullivan D.G., Gretch D.R.	Investigation of putative multisubtype hepatitis C virus infections in vivo by heteroduplex mobility analysis of core/envelope subgenomes	2008	Journal of Virology	82	15	7524	http://www.scopus.com/inward/record.url?eid=2-s2.0-47749139347&partnerID=40&md5=e21aedab125023bc1ae5ce9aac57c4d9	18495766		Genotyping/classification	AAGACGGCGTGAACTATGCAACAGGGAACCTTCCTGGTTG	817	856	837	1.4552	GACCAGTTCATCATCATATCCCATGCC	1295	1321	1309	1.7116	505
Ref176	Li J.-S., Vitvitski L., Tong S.-P., Trepo C.	Identification of the third major genotype of hepatitis C virus in France	1994	Biochemical and Biophysical Research Communications	199	3	1474	http://www.scopus.com/inward/record.url?eid=2-s2.0-0028333048&partnerID=40&md5=ddada5ffcef47a34f99346054d039272	8147893		Epidemiology	CCCTAATCGGGGCGACACTCC	8	28	19	0	GTGCTCATGGTGCACGGTCTACGAGA	324	349	337	1.884	342
Ref176	Li J.-S., Vitvitski L., Tong S.-P., Trepo C.	Identification of the third major genotype of hepatitis C virus in France	1994	Biochemical and Biophysical Research Communications	199	3	1474	http://www.scopus.com/inward/record.url?eid=2-s2.0-0028333048&partnerID=40&md5=ddada5ffcef47a34f99346054d039272	8147893		Epidemiology	GCCTGATAGGGTGCTTGCGAGT	291	312	302	1.9256	AAAGCCCCGTGGAGTTGCGCACT	920	942	932	1.3196	652
Ref176	Li J.-S., Vitvitski L., Tong S.-P., Trepo C.	Identification of the third major genotype of hepatitis C virus in France	1994	Biochemical and Biophysical Research Communications	199	3	1474	http://www.scopus.com/inward/record.url?eid=2-s2.0-0028333048&partnerID=40&md5=ddada5ffcef47a34f99346054d039272	8147893		Epidemiology	GGTTGCTCTTTCTCTATCTTTCCT	852	875	864	1.3876	GGTGCCAACTGCCGTTGGTGTT	1584	1605	1595	1.3464	754
Ref177	Li R., Sugiyama K., Goto K., Miyake Y., Wada Y.	Homology of E2 Gene in 8 Child-Mother Pairs Infected with Hepatitis C Virus	1997	Tohoku Journal of Experimental Medicine	183	3	197	http://www.scopus.com/inward/record.url?eid=2-s2.0-0031265920&partnerID=40&md5=6570a1960b63a162a8b4f21d3920860e	9550128	[Ref424]	Clustering/transmission	GGGACATGATGATCAACTGG	1300	1319	1310	1.7108	GBGAAGGAATTCACTGGGCCACA	1848	1870	1860	1.5648	571
Ref178	Lim S.P., Khu Y.L., Hong W.J., Tay A., Ting A.E., Lim S.G., Tan Y.H.	Identification and molecular characterisation of the complete genome of a Singapore isolate of hepatitis C virus: Sequence comparison with other strains and phylogenetic analysis	2001	Virus Genes	23	1	89	http://www.scopus.com/inward/record.url?eid=2-s2.0-0034858493&partnerID=40&md5=84b33c23e81a7e4beae1bea9f7ebdfac	11556407		Genotyping/classification	5'Race	1				PolyA primer		9268		1.4112	9268
Ref179	Lin H.J., Seeff L.B., Barbosa L., Hollinger F.B.	Occurrence of identical hypervariable region 1 sequences of hepatitis C virus in transfusion recipients and their respective blood donors: Divergence over time	2001	Hepatology	34	2	424	http://www.scopus.com/inward/record.url?eid=2-s2.0-0034916434&partnerID=40&md5=4332156aaa1bb26fb1a62453201e75c7	11481629		Genotyping/classification	GCATGGGATATGATGATGAA (CATGGGACATGATGCTAA)	1296	1315	1306	1.7204	GTCCTGTTGATGTGCCA	1599	1615	1608	1.4888	320
Ref180	Lindh M., Hannoun C.	Genotyping of hepatitis C virus by Taqman real-time PCR	2005	Journal of Clinical Virology	34	2	108	http://www.scopus.com/inward/record.url?eid=2-s2.0-24644507185&partnerID=40&md5=48d9419384765e00ca2bfadbd9e3791c	16157261		Genotyping/classification	ACGCAGAAAGCGTCTAGCCAT	66	86	77	1.9572	ATGTACCCCATGAGGTCGGC	732	751	742	1.5604	686
Ref181	Liu Z., Netski D.M., Mao Q., Laeyendecker O., Ticehurst J.R., Wang X.-H., Thomas D.L., Ray S.C.	Accurate representation of the hepatitis C virus quasispecies in 5.2-kilobase amplicons	2004	Journal of Clinical Microbiology	42	9	4223	http://www.scopus.com/inward/record.url?eid=2-s2.0-4644279066&partnerID=40&md5=cd9bf1295e5826017abe2705b6fedfb6	15365015		evolution	AGAAAGCGTCTAGCCATGGCGTTAG	70	94	83	1.9496	CRGCCGACATGCATGYCATGAT	5274	5295	5285	1.72124	5226
Ref182	Lo S.-Y., Lin H.H.	Variations within hepatitis C virus E2 protein and response to interferon treatment	2001	Virus Research	75	2	107	http://www.scopus.com/inward/record.url?eid=2-s2.0-0035013382&partnerID=40&md5=d2b3e163578ad93fa7ae2abc87b7b8f3	11325465	New PCR, plus [Ref78]	Treatment response/resistance	GGTCTGCCCCACGGATTG3	2078	2095	2087	1.3412	CCACAAGCAGGCACAGAC	2532	2549	2541	1.6948	472
Ref182	Lo S.-Y., Lin H.H.	Variations within hepatitis C virus E2 protein and response to interferon treatment	2001	Virus Research	75	2	107	http://www.scopus.com/inward/record.url?eid=2-s2.0-0035013382&partnerID=40&md5=d2b3e163578ad93fa7ae2abc87b7b8f3	11325465	New PCR, plus [Ref78]	Treatment response/resistance	CAGGTACGCTCCGGCGTGCA	4948	4968	4959	1.7124	GGGGCCTTGGTAGGTGGCAA	7287	7305	7297	1.754	2358
Ref183	Lole K.S., Jha J.A., Shrotri S.P., Tandon B.N., Prasad V.G.M., Arankalle V.A.	Comparison of Hepatitis C Virus Genotyping by 5â€² Noncoding Region- and Core-Based Reverse Transcriptase PCR Assay with Sequencing and Use of the Assay for Determining Subtype Distribution in India	2003	Journal of Clinical Microbiology	41	11	5240	http://www.scopus.com/inward/record.url?eid=2-s2.0-0242677585&partnerID=40&md5=ff3238cea9e72c97a667ddd49a0614df	14605173	New PCR, plus [Ref32]	Genotyping/classification	ACGCAGAAAGCGTCTAGCCATGGCGTTAGT	66	95	81	1.956	TCCCGGGGCACTCGCAAGCACCCTATCAGG	292	321	307	1.926	256
Ref183	Lole K.S., Jha J.A., Shrotri S.P., Tandon B.N., Prasad V.G.M., Arankalle V.A.	Comparison of Hepatitis C Virus Genotyping by 5â€² Noncoding Region- and Core-Based Reverse Transcriptase PCR Assay with Sequencing and Use of the Assay for Determining Subtype Distribution in India	2003	Journal of Clinical Microbiology	41	11	5240	http://www.scopus.com/inward/record.url?eid=2-s2.0-0242677585&partnerID=40&md5=ff3238cea9e72c97a667ddd49a0614df	14605173	New PCR, plus [Ref32]	Genotyping/classification	AGGTCTCGTAGACCGTGCA	321	339	331	1.916	CACGTTAGGGTATCGATGAC	705	724	715	1.5424	404
Ref184	Lu L., Nakano T., Smallwood G.A., Heffron T.G., Robertson B.H., Hagedorn C.H.	A refined long RT-PCR technique to amplify complete viral RNA genome sequences from clinical samples: Application to a novel hepatitis C virus variant of genotype 6	2005	Journal of Virological Methods	126	2011-01-02	139	http://www.scopus.com/inward/record.url?eid=2-s2.0-17644421360&partnerID=40&md5=0cf1611bd1e282dd68b079c1f5e571e0	15847930		Genotyping/classification	AATCACTCCCCTGTGAGGAACTACTGT	35	61	49	1.9364	AAATGTCTCCCCCGCTGTAGCCAGCCGTGAACC	9250	9282	9267	1.59	9248
Ref185	Maekawa S., Enomoto N., Kurosaki M., Marumo F., Sato C.	Host dependent variation of hepatitis C virus: phylogenetic analyses	1995	Archives of Virology	140	12	2123	http://www.scopus.com/inward/record.url?eid=2-s2.0-0029438297&partnerID=40&md5=31c92851441e8dd91a997c913f24a147	8572936		evolution	CTATTCCATGGTAGGGAACTGGGCTAAGGT	1424	1453	1439	1.8144	TTAGGGCGGTCCTGTTGATGTGCCA	1599	1623	1612	1.5172	200
Ref186	Maekawa S., Enomoto N., Kurosaki M., Nagayama K., Marumo F., Sato C.	Genetic changes in the interferon sensitivity determining region of hepatitis C virus during the natural course of chronic hepatitis C	2000	Journal of Medical Virology	61	3	303	http://www.scopus.com/inward/record.url?eid=2-s2.0-0034040934&partnerID=40&md5=8128c1d0400eae108966a37ad0991ab3	10861637		Natural history	GAGGAAACAGCTATGACCGGGGCCTTGGTAGGTGGCAA	6734	6483	6609	1.8104	CAGGAAACAGCTATGACC	7287	7305	7297	1.754	572
Ref187	Maggi F., Vatteroni M.L., Fornai C., Morrica A., Giorgi M., Bendinelli M., Pistello M.	Subtype 2c of hepatitis C virus is highly prevalent in Italy and is heterogeneous in the NS5A region	1997	Journal of Clinical Microbiology	35	1	161	http://www.scopus.com/inward/record.url?eid=2-s2.0-0031059928&partnerID=40&md5=cc3b97e35fcf223d1d504d96663ae049	8968899	[Ref420] and [Ref456]	Genotyping/classification	TAGATTGGGTGTGCGCGCGA	467	486	477	1.92208	AGGTTCCCTGTTGCATAATT	828	847	838	1.452	381
Ref187	Maggi F., Vatteroni M.L., Fornai C., Morrica A., Giorgi M., Bendinelli M., Pistello M.	Subtype 2c of hepatitis C virus is highly prevalent in Italy and is heterogeneous in the NS5A region	1997	J Clin Microbiol.	35	1	161	http://www.ncbi.nlm.nih.gov/pmc/articles/PMC229530/	8968899		evolution	AGGGAGAGCCTGGAGATCC	7516	7534	7526	1.3348	GAGTATGACATGGAGCAGCA	7596	7615	7606	1.8276	100
Ref187	Maggi F., Vatteroni M.L., Fornai C., Morrica A., Giorgi M., Bendinelli M., Pistello M.	Subtype 2c of hepatitis C virus is highly prevalent in Italy and is heterogeneous in the NS5A region	1997	Journal of Clinical Microbiology	35	1	161	http://www.scopus.com/inward/record.url?eid=2-s2.0-0031059928&partnerID=40&md5=cc3b97e35fcf223d1d504d96663ae049	8968899	[Ref420] and [Ref456]	Genotyping/classification		7975						8196			222
Ref188	Magrin S., Craxi A., Fabiano C., Fiorentino G., Marino L., Almasio P., Pinzello G.B., Palazzo U., Vitale M., Maggio A., Bucca G., Gianguzza F., Shyamala V., Han J.H., Pagliaro L.	Serum hepatitis C virus (HCV)-RNA and response to alpha-interferon in anti-HCV positive chronic hepatitis	1992	Journal of Medical Virology	38	3	200	http://www.scopus.com/inward/record.url?eid=2-s2.0-0026490801&partnerID=40&md5=82af830794484096207f5aedd0bd6b2d	1283753	[Ref455] and [Ref454]	Treatment response/resistance	TTCACGCAGAAAGCGTCTAG	63	82	73	1.9576	GTTGATCCAAGAAAGGACCC	188	207	198	1.8708	145
Ref188	Magrin S., Craxi A., Fabiano C., Fiorentino G., Marino L., Almasio P., Pinzello G.B., Palazzo U., Vitale M., Maggio A., Bucca G., Gianguzza F., Shyamala V., Han J.H., Pagliaro L.	Serum hepatitis C virus (HCV)-RNA and response to alpha-interferon in anti-HCV positive chronic hepatitis	1992	Journal of Medical Virology	38	3	200	http://www.scopus.com/inward/record.url?eid=2-s2.0-0026490801&partnerID=40&md5=82af830794484096207f5aedd0bd6b2d	1283753	[Ref455] and [Ref454]	Treatment response/resistance	GAGGTTTTCTGCGTCCA	8028	8044	8037	1.7968	GCGATAGCCGCAGTTCT	8416	8432	8425	1.6372	405
Ref189	Malta F.M., de Medeiros-Filho J.E.M., de Azevedo R.S., Goncalves L., da Silva L.C., Carrilho F.J., Pinho J.R.R.	Sequencing of E2 and NS5A regions of HCV genotype 3a in brazilian patients with chronic hepatitis	2010	Memorias do Instituto Oswaldo Cruz	105	1	92	http://www.scopus.com/inward/record.url?eid=2-s2.0-76749116701&partnerID=40&md5=cad18fb1090036e5236e082f2a8bc414	20209336		Treatment response/resistance	TTGTTCAAGGTGAGGATGTT	2217	2238	2228	1.442	CCAACGCCATAAAAGGTATTG	2471	2490	2481	1.828	274
Ref189	Malta F.M., de Medeiros-Filho J.E.M., de Azevedo R.S., Goncalves L., da Silva L.C., Carrilho F.J., Pinho J.R.R.	Sequencing of E2 and NS5A regions of HCV genotype 3a in brazilian patients with chronic hepatitis	2010	Memorias do Instituto Oswaldo Cruz	105	1	92	http://www.scopus.com/inward/record.url?eid=2-s2.0-76749116701&partnerID=40&md5=cad18fb1090036e5236e082f2a8bc414	20209336		Treatment response/resistance	TATGTTCCCGAGAGCGATGC	6141	6160	6151	1.8608	CTGAGTTGGGCTGATGGGCAG	7662	7681	7672	1.582	1541
Ref190	Manzin A., Solforosi L., Debiaggi M., Zara F., Tanzi E., Romano L., Zanetti A.R., Clementi M.	Dominant role of host selective pressure in driving hepatitis C virus evolution in perinatal infection	2000	Journal of Virology	74	9	4327	http://www.scopus.com/inward/record.url?eid=2-s2.0-0033999990&partnerID=40&md5=12eabeba9ab0ea08d515e5623daa4352	10756048		evolution	ATAACGGGTCACCGATGGCATAT	1278	1301	1290	1.6312	CACCACGGGGCTGGGAGTGAAGCAAT	1861	1866	1864	1.5528	589
Ref191	Manzin A., Solforosi L., Petrelli E., Macarri G., Tosone G., Piazza M., Clementi M.	Evolution of hypervariable region 1 of hepatitis C virus in primary infection	1998	Journal of Virology	72	7	6271	http://www.scopus.com/inward/record.url?eid=2-s2.0-0031749172&partnerID=40&md5=6879b855896dee0b74abcff8e81d2d19	9621104		evolution	ATAACGGGTCACCGATGGCATGGGATAT	1278	1306	1293	1.7376	CACCACCACGGGGCTGGGAGTGAAGCAAT	1861	1889	1876	1.4936	612
Ref192	Mao H., Lu Z., Zhang H., Liu K., Zhao J., Jin G., Gu S., Yang M.	Colorimetric oligonucleotide array for genotyping of hepatitis C virus based on the 5â€² non-coding region	2008	Clinica Chimica Acta	388	2011-01-02	22	http://www.scopus.com/inward/record.url?eid=2-s2.0-37249082571&partnerID=40&md5=cb516b356787ca3700056a66093823be	17976565	[Ref410]	Genotyping/classification	TCTAGCCATGGCGTTAGTRYGAGTGT	78	103	91	1.9452	CACTCGCAAGCACCCTATCAGGCAGT	288	313	301	1.9248	236
Ref193	Mao H., Zhang H., Zhang H., Zhao J., Lu Z., Jin G., Gu S., Wang H., Wang Y.	Clinical evaluation of a colorimetric oligonucleotide chip for genotyping hepatitis C virus	2010	Clinical Biochemistry	43	2011-01-02	214	http://www.scopus.com/inward/record.url?eid=2-s2.0-72649088367&partnerID=40&md5=f9bc08627998db5126df09ecc0fcb026	19786007	[Ref410]	Genotyping/classification	TCTAGCCATGGCGTTAGTRYGAGTGT	78	103	91	1.9452	CACTCGCAAGCACCCTATCAGGCAGT	288	313	301	1.9248	236
Ref194	Marshall D.J., Heisler L.M., Lyamichev V., Murvine C., Olive D.M., Ehrlich G.D., Neri B.P., De Arruda M.	Determination of hepatitis C virus genotypes in the United States by cleavase fragment length polymorphism analysis	1997	Journal of Clinical Microbiology	35	12	3156	http://www.scopus.com/inward/record.url?eid=2-s2.0-0030712209&partnerID=40&md5=9435ce54272bdc0e6816d629c215b572	9399512	[Ref453]	Epidemiology	CACTCCCCTGTGAGGAACTACTGTCT	38	63	51	1.9372	TACCACAAGGCCTTTCGCGACCCAACACTACTC	256	288	273	1.9264	251
Ref195	Martro E., Gonzalez V., Buckton A.J., Saludes V., Fernandez G., Matas L., Planas R., Ausina V.	Evaluation of a new assay in comparison with reverse hybridization and sequencing methods for hepatitis C virus genotyping targeting both 5â€² noncoding and nonstructural 5b genomic regions	2008	Journal of Clinical Microbiology	46	1	192	http://www.scopus.com/inward/record.url?eid=2-s2.0-38149136310&partnerID=40&md5=8ca7f27668231307ac047e605b57e41b	17989191	TruGene 5'NC [Ref266], plus [Ref403]	Genotyping/classification		96						278			183
Ref195	Martro E., Gonzalez V., Buckton A.J., Saludes V., Fernandez G., Matas L., Planas R., Ausina V.	Evaluation of a new assay in comparison with reverse hybridization and sequencing methods for hepatitis C virus genotyping targeting both 5â€² noncoding and nonstructural 5b genomic regions	2008	Journal of Clinical Microbiology	46	1	192	http://www.scopus.com/inward/record.url?eid=2-s2.0-38149136310&partnerID=40&md5=8ca7f27668231307ac047e605b57e41b	17989191	TruGene 5'NC [Ref266], plus [Ref403]	Genotyping/classification	ATGGGGTTCTCGTATGATACCCGCTGCTTTGACTC	8244	8278	8262	1.8	GCTCTCAGGTTCCGCTCGTCCTCC	8591	8614	8603	1.7288	371
Ref197	Matsumori A., Matoba Y., Nishio R., Shioi T., Ono K., Sasayama S.	Detection of hepatitis C virus RNA from the heart of patients with hypertrophic cardiomyopathy	1996	Biochemical and Biophysical Research Communications	222	3	678	http://www.scopus.com/inward/record.url?eid=2-s2.0-0029992196&partnerID=40&md5=9f61b9828a14a6cb298b3bdd261b1426	8651904	[Ref236]	Genotyping/classification	TAGATTGGGTGTGCGCGCGA	467	486	477	1.92208	AGGTTCCCTGTTGCATAATT	828	847	838	1.452	381
Ref198	Mellor J., Walsh E.A., Prescott L.E., Jarvis L.M., Davidson F., Yap P.L., Simmonds P., Nowicki M.J., Mosley J.W., Lin C.K., Lai C.L., De Olim G., Martins I.A., Duraisamy G., Ong Y.W., Teo D., Lin M., Nuchprayoon C., Tanprasert S.	Survey of type 6 group variants of hepatitis C virus in Southeast Asia by using a core-based genotyping assay	1996	Journal of Clinical Microbiology	34	2	417	http://www.scopus.com/inward/record.url?eid=2-s2.0-9044233638&partnerID=40&md5=de5b4be04c0126067d508667d163f72e	8789027	[Ref403]	Epidemiology	TTCACGCAGAAAGCGTCTAG	63	82	73	1.9576	CACTCTCGAGCACCCTATCAGGCAGT	288	313	301	1.9248	251
Ref198	Mellor J., Walsh E.A., Prescott L.E., Jarvis L.M., Davidson F., Yap P.L., Simmonds P., Nowicki M.J., Mosley J.W., Lin C.K., Lai C.L., De Olim G., Martins I.A., Duraisamy G., Ong Y.W., Teo D., Lin M., Nuchprayoon C., Tanprasert S.	Survey of type 6 group variants of hepatitis C virus in Southeast Asia by using a core-based genotyping assay	1996	Journal of Clinical Microbiology	34	2	417	http://www.scopus.com/inward/record.url?eid=2-s2.0-9044233638&partnerID=40&md5=de5b4be04c0126067d508667d163f72e	8789027	[Ref403]	Epidemiology	AGGTCTCGTAGACCGTGCATCATG	321	344	333	1.9112	CACGTAAGGGTATCGATGAC	705	724	715	1.5424	404
Ref198	Mellor J., Walsh E.A., Prescott L.E., Jarvis L.M., Davidson F., Yap P.L., Simmonds P., Nowicki M.J., Mosley J.W., Lin C.K., Lai C.L., De Olim G., Martins I.A., Duraisamy G., Ong Y.W., Teo D., Lin M., Nuchprayoon C., Tanprasert S.	Survey of type 6 group variants of hepatitis C virus in Southeast Asia by using a core-based genotyping assay	1996	Journal of Clinical Microbiology	34	2	417	http://www.scopus.com/inward/record.url?eid=2-s2.0-9044233638&partnerID=40&md5=de5b4be04c0126067d508667d163f72e	8789027	[Ref403]	Epidemiology	ATGGGGTTCTCGTATGATACCCGCTGCTTTGACTC	8244	8278	8262	1.8	GCTCTCAGGTTCCGCTCGTCCTCC	8591	8614	8603	1.7288	371
Ref199	Michaelis S., Kazakov D.V., Schmid M., Dummer R., Burg G., Kempf W.	Hepatitis C and G viruses in B-cell lymphomas of the skin	2003	Journal of Cutaneous Pathology	30	6	369	http://www.scopus.com/inward/record.url?eid=2-s2.0-0038164738&partnerID=40&md5=4d4dddd3ae2318ae204620bc729a5be6	12834485		Genotyping/classification	TTCACGCAGAAAGCGTCTAG	63	82	73	1.9576	CACTCTCGAGCACCCTATCAGGCAGT	288	313	301	1.9248	251
Ref200	Mihm S., Monazahian M., Grethe S., Fechner C., Ramadori G., Thomssen R.	Ratio of serum Î³-GT/ALT rather than ISDR variability is predictive for initial virological response to IFN-Î± in chronic HCV infection	1999	Journal of Medical Virology	58	3	227	http://www.scopus.com/inward/record.url?eid=2-s2.0-0033001639&partnerID=40&md5=a4953af7251310e3091016d2bd6f3e7a	10447417		Treatment response/resistance	CAGGTACGCTCCGGCGTGCA	4948	4968	4959	1.7124	GGGGCCTTGGTAGGTGGCAA	7287	7305	7297	1.754	2358
Ref200	Mihm S., Monazahian M., Grethe S., Fechner C., Ramadori G., Thomssen R.	Ratio of serum Î³-GT/ALT rather than ISDR variability is predictive for initial virological response to IFN-Î± in chronic HCV infection	1999	Journal of Medical Virology	58	3	227	http://www.scopus.com/inward/record.url?eid=2-s2.0-0033001639&partnerID=40&md5=a4953af7251310e3091016d2bd6f3e7a	10447417		Treatment response/resistance	GCGCGCGGGTCCCCTCCATC	6912	6931	6922	1.598	GTCCGGTCTAGCCCAGATAG	7198	7217	7208	1.7764	306
Ref201	Mihm S., Monazahian M., Grethe S., Meier V., Thomssen R., Ramadori G.	Lack of clinical evidence for involvement of hepatitis C virus interferon-Î± sensitivity-determining region variability in RNA-dependent protein kinase-mediated cellular antiviral responses	2000	Journal of Medical Virology	61	1	29	http://www.scopus.com/inward/record.url?eid=2-s2.0-0034080813&partnerID=40&md5=f6064372de8e50bcac12e2129e8e551c	10745229		evolution	GCGCGCGGGTCCCCTCCATC	6912	6931	6922	1.598	GTCCGGTCTAGCCCAGATAG	7198	7217	7208	1.7764	306
Ref202	Missale G., Cariani E., Lamonaca V., Ravaggi A., Rossini A., Bertoni R., Houghton M., Matsuura Y., Miyamura T., Fiaccadori F., Ferrari C.	Effects of interferon on the antiviral T-cell response in hepatitis C virus genotype 1b- and genotype 2c-infected patients	1997	Hepatology	26	3	792	http://www.scopus.com/inward/record.url?eid=2-s2.0-0031230799&partnerID=40&md5=5f63e41b03f51580c46229cee37ecc2e	9303515		Treatment response/resistance	AGGTCTCGTAGACCGTGCATC	321	341	332	1.9176	TAATCGATGACCTTACCCAA	696	715	706	1.4864	395
Ref202	Missale G., Cariani E., Lamonaca V., Ravaggi A., Rossini A., Bertoni R., Houghton M., Matsuura Y., Miyamura T., Fiaccadori F., Ferrari C.	Effects of interferon on the antiviral T-cell response in hepatitis C virus genotype 1b- and genotype 2c-infected patients	1997	Hepatology	26	3	792	http://www.scopus.com/inward/record.url?eid=2-s2.0-0031230799&partnerID=40&md5=5f63e41b03f51580c46229cee37ecc2e	9303515		Treatment response/resistance	TTTGCCGACCTCATGGGGTAC	729	749	740	1.5912	CACCTGCCATTGGTGTTGAT	1581	1600	1591	1.2936	872
Ref203	Mizuno M., Higuchi T., Kanmatsuse K., Esumi M.	Genetic and serological evidence for multiple instances of unrecognized transmission of hepatitis C virus in hemodialysis units	1998	Journal of Clinical Microbiology	36	10	2926	http://www.scopus.com/inward/record.url?eid=2-s2.0-0031712558&partnerID=40&md5=c518e8aa8a7f941d256ef39197a94025	9738045		Clustering/transmission	CATGGCGGGGAACTGGGCTAAGGT	1430	1453	1442	1.8128	CAGGGCAGTCCTGTTGATGTGCCA	1599	1622	1611	1.4708	193
Ref204	Mizutani T., Kato N., Ikeda M., Sugiyama K., Shimotohno K.	Long-term human T-cell culture system supporting hepatitis C virus replication	1996	Biochemical and Biophysical Research Communications	227	3	822	http://www.scopus.com/inward/record.url?eid=2-s2.0-0030599454&partnerID=40&md5=da648098a9c320da94d077dae1d58a6a	8886016	[Ref451]. And [Ref452]	evolution	ATTCCATGGTGGGGAACTGG	1426	1445	1436	1.8068	GGGGTGAAGCAATACACTGG	1854	1873	1864	1.5528	448
Ref206	Morandi L, Ferrari D, Lombardo C, Pession A, Tallini G.	Monitoring HCV RNA viral load by locked nucleic acid molecular beacons real time PCR.	2007	J Virol Methods	140	1	148	/pubmed/17175034	17175034	[Ref449]	Genotyping/classification	GCAGAAAGCGTCTAGCCATGGCGT	68	91	80	1.9556	CTCGCAAGCACCCTATCAGGCAGT	288	311	300	1.926	244
Ref209	Muller H.M., Pfaff E., Goeser T., Kallinowski B., Solbach C., Theilmann L.	Peripheral blood leukocytes serve as a possible extrahepatic site for hepatitis C virus replication	1993	Journal of General Virology	74	4	669	http://www.scopus.com/inward/record.url?eid=2-s2.0-0027450038&partnerID=40&md5=f9ad956a91a457abef27d861ff80b4f1	8385695		Genotyping/classification	ACTTCTTGTCCCAGACCAAGCAGG	5053	5076	5065	1.8676	TCCGCTTGCTTGGTGGCTGTTTGC	5549	5572	5561	1.7396	520
Ref210	Murashima S., Ide T., Miyajima I., Kumashiro R., Ueno T., Sakisaka S., Sata M.	Mutations in the NS5A gene predict response to interferon therapy in Japanese patients with chronic hepatitis C and cirrhosis	1999	Scandinavian Journal of Infectious Diseases	31	1	27	http://www.scopus.com/inward/record.url?eid=2-s2.0-0033011927&partnerID=40&md5=3055aa3f17d77c193ae274727b7ed0b2	10381214		Treatment response/resistance	CTYACTKCCATGCTYACCGA	6852	6871	6862	1.4552	ACCTTYCAGGTCGGGCTCAAC	6969	6988	6979	1.5116	137
Ref211	Murashima S., Sata M., Suzuki H., Noguchi S., Tanikawa K.	Sequence variation of the hypervariable region in HCV carriers with normal ALT levels: A comparison with symptomatic carriers	1996	Microbiology and Immunology	40	12	941	http://www.scopus.com/inward/record.url?eid=2-s2.0-0030443492&partnerID=40&md5=611b37ae76b6f62866584844f8d2fdcb	9013492		evolution	TCTGGATCCTATTCCATGGTGGGGAACTG	1416	1444	1431	1.758	AATGAATTCATACTACAACAGGGCTKGGRGTGAA	1866	1899	1883	1.4628	484
Ref212	Nagasaka A., Hige S., Kurosawa M., Yoshida J., Karino Y., Toyota J., Matsushima T., Asaka M.	Nucleotide sequences of the hepatitis C virus core region in patients without anti-core antibody	1996	Journal of Medical Virology	49	2	91	http://www.scopus.com/inward/record.url?eid=2-s2.0-0029888653&partnerID=40&md5=1cdf82a4071a82a6f22af24653e7bda1	8991942		evolution	TGTTGGGTCGCGAAAGGCCT	262	281	272	1.9264	TGACATGGTATACCCCGGACGCGTT	927	951	940	1.4084	690
Ref213	Nagayama K., Enomoto N., Izumi N., Kurosaki M., Miyasaka Y., Watanabe H., Itakura J., Chen C.-H., Tazawa J., Hoshino Y., Ikeda T., Marumo F., Sato C.	Sequences in the NS5A protein of hepatitis C virus and the serum alanine aminotransferase response to interferon therapy in Japanese patients	2001	Gut	48	6	830	http://www.scopus.com/inward/record.url?eid=2-s2.0-0035009208&partnerID=40&md5=144561bce5bdecb11ca6004b78c21e63	11358904	[Ref402]	evolution	13	13				9394		9394			9382
Ref214	Nagayama K., Kurosaki M., Enomoto N., Maekawa S.-Y., Miyasaka Y., Tazawa J.-I., Izumi N., Marumo F., Sato C.	Time-related changes in full-length hepatitis C virus sequences and hepatitis activity	1999	Virology	263	1	244	http://www.scopus.com/inward/record.url?eid=2-s2.0-0033543977&partnerID=40&md5=7315c416a0c3439d3e7a0879ac09dc91	10544098	[Ref402]	evolution	13	13				9394		9394			9382
Ref215	Nagayama K., Kurosaki M., Enomoto N., Miyasaka Y., Marumo F., Sato C.	Characteristics of hepatitis C viral genome associated with disease progression	2000	Hepatology	31	3	745	http://www.scopus.com/inward/record.url?eid=2-s2.0-0034002712&partnerID=40&md5=1137ea34befce739a6e6f751bba0cccc	10706567	[Ref214]	evolution	5'Race	13				3'Race		9394			9382
Ref216	Nakano I., Fukuda Y., Katano Y., Nakano S., Kumada T., Hayakawa T.	Why is the interferon sensitivity-determining region (ISDR) system useful in Japan?	1999	Journal of Hepatology	30	6	1014	http://www.scopus.com/inward/record.url?eid=2-s2.0-0033002009&partnerID=40&md5=9d88c65ca99e1d26637eb118f3e10e21	10406178	[Ref444]	Treatment response/resistance	ACTGGATCCTACCATGTCACSAAYGAYTGC	933	962	948	1.51	TCCCANGCCATNCGRTGNCC	1284	1303	1294	1.7656	371
Ref218	Nakatani S.M., Santos C.A., Riediger I.N., Krieger M.A., Duarte C.A., Do Carmo Debur M., Carrilho F.J., Ono S.K.	Comparative performance evaluation of hepatitis C virus genotyping based on the 5' untranslated region versus partial sequencing of the NS5B region of brazilian patients with chronic hepatitis C	2011	Virology Journal	8			http://www.scopus.com/inward/record.url?eid=2-s2.0-80053442210&partnerID=40&md5=15cebe9099733a313a76453c3db9e8b2			Genotyping/classification	CACACTCCAGTYAAYTCCTGG	8805	8825	8816	1.7912	CWMCTGGAGAGTAACTGTGGAG	9021	9042	9032	1.6968	238
Ref219	Nakayama H., Sugai Y., Ikeya S., Inoue J., Nishizawa T., Okamoto H.	Molecular investigation of interspousal transmission of hepatitis C virus in two Japanese patients who acquired acute hepatitis C after 40 or 42 years of marriage	2005	Journal of Medical Virology	75	2	258	http://www.scopus.com/inward/record.url?eid=2-s2.0-11144236495&partnerID=40&md5=81a236d66a9b69344d6d04cb01eca1c5	15602741	New PCR, plus [Ref424]	Clustering/transmission	GCTGTTTTGACTCAACGGTCAC	1299	1321	1311	1.694	ATGTGCCAACTGCCGTTGGT	1597	1606	1602	1.3848	308
Ref219	Nakayama H., Sugai Y., Ikeya S., Inoue J., Nishizawa T., Okamoto H.	Molecular investigation of interspousal transmission of hepatitis C virus in two Japanese patients who acquired acute hepatitis C after 40 or 42 years of marriage	2005	Journal of Medical Virology	75	2	258	http://www.scopus.com/inward/record.url?eid=2-s2.0-11144236495&partnerID=40&md5=81a236d66a9b69344d6d04cb01eca1c5	15602741	New PCR, plus [Ref424]	Clustering/transmission	GCTGTTTTGACTCAACGGTCAC	8266	8287	8277	1.8312	GAGTGGTTAGCTCCCCGTTCA	9375	9395	9386	1.6544	1130
Ref220	Nakazawa T., Kato N., Ootsuyama Y., Sekiya H., Fujioka T., Shibuya A., Shimotohno K.	Genetic alteration of the hepatitis C virus hypervariable region obtained from an asymptomatic carrier	1994	International Journal of Cancer	56	2	204	http://www.scopus.com/inward/record.url?eid=2-s2.0-0028230023&partnerID=40&md5=26600208b785d0a3981995af88c3c911	8314302	[Ref442] and [Ref443]	evolution		1491	1510	1501	1.5824		1761	1780	1771	1.5104	290
Ref222	Ni Y.-H., Chang M.-H., Lin K.-H., Chen P.-J., Lin D.-T., Hsu H.-Y., Chen D.-S.	Hepatitis C viral infection in thalassemic children: Clinical and molecular studies	1996	Pediatric Research	39	2	323	http://www.scopus.com/inward/record.url?eid=2-s2.0-0030065487&partnerID=40&md5=ae04a132d054b0ce1375941670c4a1af	8825807		evolution	TTAGTCGACTGGGGAGTCTGGCGGGC	1390	1415	1403	1.7116	TTGCATGCCAGCTGCCATTGGTGTT	1584	1609	1597	1.3968	220
Ref223	Noguchi S., Sata M., Suzuki H., Mizokami M., Tanikawa K.	Routes of transmission of hepatitis C virus in an endemic rural area of Japan. Molecular epidemiologic study of hepatitis C virus infection	1997	Scandinavian Journal of Infectious Diseases	29	1	23	http://www.scopus.com/inward/record.url?eid=2-s2.0-0030938531&partnerID=40&md5=f18f802a46e7ffe17c5b7d8fe9a15855	9112293		Clustering/transmission	GGGAGGTCTCGTAGACCGTGCACCATG	318	344	332	1.9176	CTACGCCGGGGGTCWGTRGGGCCCCA	660	685	673	1.6404	368
Ref224	Nolte F.S., Green A.M., Fiebelkorn K.R., Caliendo A.M., Sturchio C., Grunwald A., Healy M.	Clinical evaluation of two methods for genotyping hepatitis C virus based on analysis of the 5â€² noncoding region	2003	Journal of Clinical Microbiology	41	4	1558	http://www.scopus.com/inward/record.url?eid=2-s2.0-0037388634&partnerID=40&md5=33fd4533a34b24bc55e95d2be48ed2af	12682145	TrueGene 5'NC [Ref266]	Genotyping/classification		96						278			183
Ref225	Noppornpanth S., Sablon E., De Nys K., Lien T.X., Brouwer J., Van Brussel M., Smits S.L., Poovorawan Y., Osterhaus A.D.M.E., Haagmans B.L.	Genotyping hepatitis C viruses from Southeast Asia by a novel line probe assay that simultaneously detects core and 5â€² untranslated regions	2006	Journal of Clinical Microbiology	44	11	3969	http://www.scopus.com/inward/record.url?eid=2-s2.0-33750944590&partnerID=40&md5=04db63633172ab4138d082a38fe75346	16957039	[Ref403]	Genotyping/classification	AGGTCTCGTAGACCGTGCATCATG	321	344	333	1.9112	CACGTAAGGGTATCGATGAC	705	724	715	1.5424	404
Ref225	Noppornpanth S., Sablon E., De Nys K., Lien T.X., Brouwer J., Van Brussel M., Smits S.L., Poovorawan Y., Osterhaus A.D.M.E., Haagmans B.L.	Genotyping hepatitis C viruses from Southeast Asia by a novel line probe assay that simultaneously detects core and 5â€² untranslated regions	2006	Journal of Clinical Microbiology	44	11	3969	http://www.scopus.com/inward/record.url?eid=2-s2.0-33750944590&partnerID=40&md5=04db63633172ab4138d082a38fe75346	16957039	[Ref403]	Genotyping/classification	TGGGGATCCCGTATGATACCCGCTGCTTTGA	8245	8275	8261	1.7908	GGCGGAATTCCTGGTCATAGCCTCCGTGAA	8616	8645	8631	1.5956	401
Ref226	Norder H., Bergstrom A., Uhnoo I., Alden J., Weiss L., Czajkowski J., Magnius L.	Confirmation of nosocomial transmission of hepatitis C virus by phylogenetic analysis of the NS5-B region	1998	Journal of Clinical Microbiology	36	10	3066	http://www.scopus.com/inward/record.url?eid=2-s2.0-0031659297&partnerID=40&md5=5e8b5208510550f7c2d6baeedbb13689	9738071		Clustering/transmission	CGCGCGACTAGGAAGACTTC	480	499	490	1.93648	ATGTACCCCATGAGGTCGGC	732	751	742	1.5604	272
Ref226	Norder H., Bergstrom A., Uhnoo I., Alden J., Weiss L., Czajkowski J., Magnius L.	Confirmation of nosocomial transmission of hepatitis C virus by phylogenetic analysis of the NS5-B region	1998	Journal of Clinical Microbiology	36	10	3066	http://www.scopus.com/inward/record.url?eid=2-s2.0-0031659297&partnerID=40&md5=5e8b5208510550f7c2d6baeedbb13689	9738071		Clustering/transmission	ATACCCGCTGCTTTGACTC	8260	8278	8270	1.8408	ATACCTAGTCATAGCCTCCGTGA	8617	8639	8629	1.5672	380
Ref227	O'Brien C.B., Henzel B.S., Wolfe L., Gutekunst K., Moonka D.	cDNA sequencing of the 5' noncoding region (5' NCR) to determine hepatitis C genotypes in patients with chronic hepatitis C	1997	Digestive Diseases and Sciences	42	5	1087	http://www.scopus.com/inward/record.url?eid=2-s2.0-0030998267&partnerID=40&md5=bd854c628effc61d944c6d45b3c714a2	9149068	[Ref478]	Genotyping/classification	GCAGAAAGCGTCTAGCCATGGCGT	68	91	80	1.9556	ACAAGGCCTTTCGC	271	284	278	1.934	217
Ref228	Odeberg J., Yun Z., Sonnerborg A., Uhlen M., Lundeberg J.	Dynamic analysis of heterogeneous hepatitis C virus populations by direct solid-phase sequencing	1995	Journal of Clinical Microbiology	33	7	1870	http://www.scopus.com/inward/record.url?eid=2-s2.0-0029027677&partnerID=40&md5=b2c911ded0854ca4fdf789e6182b06ff	7665662		evolution	TCTCCATGGTGGGGAACTGG	1426	1445	1436	1.8068	TCATTGCAGTTCAGGGCCGT	1614	1633	1624	1.7704	208
Ref229	Odeberg J., Yun Z., Sonnerborg A., Weiland O., Lundeberg J.	Variation in the hepatitis C virus NS5a region in relation to hypervariable region 1 heterogeneity during interferon treatment	1998	Journal of Medical Virology	56	1	33	http://www.scopus.com/inward/record.url?eid=2-s2.0-0031851835&partnerID=40&md5=c822a75af160c2f5e7aca8de5ab53906	9700630	[Ref228]	Treatment response/resistance	TCTCCATGGTGGGGAACTGG	1426	1445	1436	1.8068	TCATTGCAGTTCAGGGCCGT	1614	1633	1624	1.7704	208
Ref230	Ohno T., Mizokami M., Saleh M.G., Orito E., Ohba K.-I., Wu R.-R., Koide T., Tibbs C.J., Nouri-Aria K.T., Tokudome S., Williams R.	Usefulness and limitation of phylogenetic analysis for hepatitis C virus core region: Application to isolates from Egyptian and Yemeni patients	1996	Archives of Virology	141	6	1101	http://www.scopus.com/inward/record.url?eid=2-s2.0-9544225035&partnerID=40&md5=98055027b4ee1e92af3467c344b32706	8712927		Genotyping/classification	AGACCGTGCACCATGAGCAC	330	349	340	1.8664	TACGCCGGGGGTCATTAGGGCCCCA	660	684	673	1.6404	355
Ref230	Ohno T., Mizokami M., Saleh M.G., Orito E., Ohba K.-I., Wu R.-R., Koide T., Tibbs C.J., Nouri-Aria K.T., Tokudome S., Williams R.	Usefulness and limitation of phylogenetic analysis for hepatitis C virus core region: Application to isolates from Egyptian and Yemeni patients	1996	Archives of Virology	141	6	1101	http://www.scopus.com/inward/record.url?eid=2-s2.0-9544225035&partnerID=40&md5=98055027b4ee1e92af3467c344b32706	8712927		Genotyping/classification	GCAACAGGGAATCTACCTGGTTGCTC	834	859	847	1.4756	TTGATGTGCCAACTGCCATTGG	1588	1609	1599	1.3748	776
Ref231	Ohno T., Mizokami M., Tibbs C.J., Nouri-Aria K.T., Wu R.-R., Ohba K.-I., Orito E., Suzuki K., Mizoguchi N., Nakano T., Khan M., Yano M., Kiyosawa K., Williams R.	Nucleotide sequence of the core region of hepatitis C virus in Pakistan and Bangladesh and the geographic characterisation of hepatitis C virus in South Asia	1994	Journal of Medical Virology	44	4	362	http://www.scopus.com/inward/record.url?eid=2-s2.0-0028557419&partnerID=40&md5=096e159295538cfa50314541bb96518e	7534819		Epidemiology	TTAGGATCCGGGAGGTCTCGTAGACCGTGCACCATG	308	344	327	1.922	TTTGAATTCCTACGCCGGGGGTCWGTRGGGCCCCA	660	694	678	1.5816	387
Ref232	Ohno T., Mizokami M., Wu R.-R., Saleh M.G., Ohba K.-I., Orito E., Mukaide M., Williams R., Lau J.Y.N.	New hepatitis C virus (HCV) genotyping system that allows for identification of HCV genotypes 1a, 1b, 2a, 2b, 3a, 3b, 4, 5a, and 6a	1997	Journal of Clinical Microbiology	35	1	201	http://www.scopus.com/inward/record.url?eid=2-s2.0-0031059949&partnerID=40&md5=eeaf842129d9563f8bbbef99c45b44c7	8968908		Genotyping/classification	AGACCGTGCACCATGAGCAC	330	349	340	1.8664	TACGCCGGGGGTCATTGGGGCCCCA	660	684	673	1.6404	355
Ref233	Okamoto H., Kojima M., Sakamoto M., Iizuka H., Hadiwandowo S., Suwignyo S., Miyakawa Y., Mayumi M.	The entire nucleotide sequence and classification of a hepatitis C virus isolate of a novel genotype from an Indonesian patient with chronic liver disease	1994	Journal of General Virology	75	3	629	http://www.scopus.com/inward/record.url?eid=2-s2.0-0028274107&partnerID=40&md5=df12afe5e5a2bc20e640089b7f136f1b	8126459		Genotyping/classification	5'Race	1				3'Race		9463			9463
Ref234	Okamoto H., Kurai K., Okada S.-I., Yamamoto K., Lizuka H., Tanaka T., Fukuda S., Tsuda F., Mishiro S.	Full-length sequence of a hepatitis C virus genome having poor homology to reported isolates: Comparative study of four distinct genotypes	1992	Virology	188	1	331	http://www.scopus.com/inward/record.url?eid=2-s2.0-0026751054&partnerID=40&md5=87ac1d8939729247adb713fb7a1c0eeb	1314459		Genotyping/classification	5'Race	1				3'Race		9463			9463
Ref235	Okamoto H., Okada S., Sugiyama Y., Kurai K., Iizuka H., Machida A., Miyakawa Mayumi Y.M.	Nucleotide sequence of the genomic RNA of hepatitis C virus isolated from a human carrier: Comparison with reported isolates for conserved and divergent regions	1991	Journal of General Virology	72	11	2697	http://www.scopus.com/inward/record.url?eid=2-s2.0-0025933437&partnerID=40&md5=43b4638114f1a2f3b2293968917abb94	1658196		Genotyping/classification	5'Race	1				PolyA primer		9523			9523
Ref236	Okamoto H., Sugiyama Y., Okada S., Kurai K., Akahane Y., Sugai Y., Tanaka T., Sato K., Tsuda F., Miyakawa Y., Mayumi M.	Typing hepatitis C virus by polymerase chain reaction with type-specific primers: Application to clinical surveys and tracing infectious sources	1992	Journal of General Virology	73	3	673	http://www.scopus.com/inward/record.url?eid=2-s2.0-0026563204&partnerID=40&md5=f7befeeb5dadef00c296b4fd88be5269	1312125		Genotyping/classification	TAGATTGGGTGTGCGCGCGA	467	486	477	1.92208	AGGTTCCCTGTTGCATAATT	828	847	838	1.452	381
Ref237	Okamoto H., Tokita H., Sakamoto M., Horikita M., Kojima M., Iizukas H., Mishiro S.	Characterization of the genomic sequence of type V (or 3a) hepatitis C virus isolates and PCR primers for specific detection	1993	Journal of General Virology	74	11	2385	http://www.scopus.com/inward/record.url?eid=2-s2.0-0027385067&partnerID=40&md5=868f64e082c642cf906c3522f51eecdf	7504073	[Ref236], [Ref407]	Genotyping/classification	45	45						847			803
Ref237	Okamoto H., Tokita H., Sakamoto M., Horikita M., Kojima M., Iizukas H., Mishiro S.	Characterization of the genomic sequence of type V (or 3a) hepatitis C virus isolates and PCR primers for specific detection	1993	Journal of General Virology	74	11	2385	http://www.scopus.com/inward/record.url?eid=2-s2.0-0027385067&partnerID=40&md5=868f64e082c642cf906c3522f51eecdf	7504073	[Ref236], [Ref407]	Genotyping/classification	GCCGATCTCATGGGGTACAT	732	751	742	1.5604	ATGTGCCACGAGCCATTGGT	1587	1606	1597	1.3968	875
Ref237	Okamoto H., Tokita H., Sakamoto M., Horikita M., Kojima M., Iizukas H., Mishiro S.	Characterization of the genomic sequence of type V (or 3a) hepatitis C virus isolates and PCR primers for specific detection	1993	Journal of General Virology	74	11	2385	http://www.scopus.com/inward/record.url?eid=2-s2.0-0027385067&partnerID=40&md5=868f64e082c642cf906c3522f51eecdf	7504073	[Ref236], [Ref407]	Genotyping/classification	GGGACATGATGATCAACTGG	1300	1319	1310	1.7108	GBGAAGGAATTCACTGGGCCACA	1848	1870	1860	1.5648	571
Ref237	Okamoto H., Tokita H., Sakamoto M., Horikita M., Kojima M., Iizukas H., Mishiro S.	Characterization of the genomic sequence of type V (or 3a) hepatitis C virus isolates and PCR primers for specific detection	1993	Journal of General Virology	74	11	2385	http://www.scopus.com/inward/record.url?eid=2-s2.0-0027385067&partnerID=40&md5=868f64e082c642cf906c3522f51eecdf	7504073	[Ref236], [Ref407]	Genotyping/classification	GACACCCGCTGTTTTGACTC	8259	8278	8269	1.8316			9481	4741	1.6608	1223
Ref239	Okuda M., Hino K., Korenaga M., Yamaguchi Y., Katoh Y., Okita K.	Differences in hypervariable region 1 quasispecies of hepatitis C virus in human serum, peripheral blood mononuclear cells, and liver	1999	Hepatology	29	1	217	http://www.scopus.com/inward/record.url?eid=2-s2.0-0032924104&partnerID=40&md5=85862888d1e21520304c2b5f449ff814	9862869	[Ref411]	evolution	GGCCTTGCCTACTATTCCAT	1413	1432	1423	1.7108	GTCCTGTTGATGTGCCA	1599	1615	1608	1.4888	203
Ref240	Okumura A., Yoshioka K., Aiyama T., Takayanagi M., Iwata K., Ishikawa T., Kakumu S.	Different constitution of hepatitis C virus population in peripheral blood mononuclear cells and plasma in patients with type C chronic liver disease	1998	Digestive Diseases and Sciences	43	2	377	http://www.scopus.com/inward/record.url?eid=2-s2.0-0031915472&partnerID=40&md5=630d62d0a2bc714de2335411e491d672	9512134		evolution	CCATGGTGGGGAACTGGGCTAAGGT	1429	1453	1442	1.8128	CAGAGCGGTCCTGTTGATGTGCCA	1599	1622	1611	1.4708	194
Ref241	Okura I., Horiike N., Michitaka K., Onji M.	Effect of mutation in the hepatitis C virus nonstructural 5B region on HCV replication	2004	Journal of Gastroenterology	39	5	449	http://www.scopus.com/inward/record.url?eid=2-s2.0-3042611934&partnerID=40&md5=6f786920e145cf2d43258553cb904446	15175943	[Ref441]	Natural history	GAGGAGTCAATTTACCAATG	8307	8326	8317	1.8064	GGAATTGACTGGAGTGTGTCT	8802	8822	8813	1.7552	516
Ref242	Oni A.O., Harrison T.J.	Genotypes of hepatitis C virus in Nigeria	1996	Journal of Medical Virology	49	3	178	http://www.scopus.com/inward/record.url?eid=2-s2.0-0029760678&partnerID=40&md5=6c244bd04b3ac26e3e1a612ede6b3cc6	8818962	New PCR, plus [Ref358], and [Ref403]	Epidemiology	TTCACGCAGAAAGCGTCTAG	63	82	73	1.9576	CACTCTCGAGCACCCTATCAGGCAGT	288	313	301	1.9248	251
Ref242	Oni A.O., Harrison T.J.	Genotypes of hepatitis C virus in Nigeria	1996	Journal of Medical Virology	49	3	178	http://www.scopus.com/inward/record.url?eid=2-s2.0-0029760678&partnerID=40&md5=6c244bd04b3ac26e3e1a612ede6b3cc6	8818962	New PCR, plus [Ref358], and [Ref403]	Epidemiology	GGCGAATTCTCTCGTAGACCGTGCACCATG	315	344	330	1.9184	GCTAGATCTTCCCTGTTGCATAGTTCACGCCG	821	854	838	1.452	540
Ref242	Oni A.O., Harrison T.J.	Genotypes of hepatitis C virus in Nigeria	1996	Journal of Medical Virology	49	3	178	http://www.scopus.com/inward/record.url?eid=2-s2.0-0029760678&partnerID=40&md5=6c244bd04b3ac26e3e1a612ede6b3cc6	8818962	New PCR, plus [Ref358], and [Ref403]	Epidemiology	CTCAACSGTCACSGAGARGGCAT	8276	8299	8288	1.7992	GCTCTCAGGTTCCGCTCGTCCTCC	8591	8614	8603	1.7288	339
Ref243	Orii K., Tanaka E., Rokuhara A., Maruyama A., Ichijo T., Yoshizawa K., Kiyosawa K.	Persistent infection mechanism of GB virus C/hepatitis G virus differs from that of hepatitis C virus	2000	Intervirology	43	3	139	http://www.scopus.com/inward/record.url?eid=2-s2.0-0033765255&partnerID=40&md5=5db615324a2beffad54824c2d4e4b15e	11044807		Natural history	CAAGATTGCAATTGCTCAATCTA	1245	1267	1257	1.5852	TAGGTACGTAGTGCCAGCAATAAGG	1791	1815	1804	1.4224	571
Ref244	Panigrahi A.K., Roca J., Acharya S.K., Jameel S., Panda S.K.	Genotype determination of hepatitis C virus from Northern India: Identification of a new subtype	1996	Journal of Medical Virology	48	2	191	http://www.scopus.com/inward/record.url?eid=2-s2.0-0030020144&partnerID=40&md5=ffc61296bc06d302059ce6fdbcb0fcb7	8835354		Genotyping/classification	TTCACGCAGAAAGCGTCTAG	63	82	73	1.9576	CACTCGCAAGCACCCTATCAGGCATGCA	287	313	301	1.9248	251
Ref244	Panigrahi A.K., Roca J., Acharya S.K., Jameel S., Panda S.K.	Genotype determination of hepatitis C virus from Northern India: Identification of a new subtype	1996	Journal of Medical Virology	48	2	191	http://www.scopus.com/inward/record.url?eid=2-s2.0-0030020144&partnerID=40&md5=ffc61296bc06d302059ce6fdbcb0fcb7	8835354		Genotyping/classification	AGTGCCCCGGGAGGTCTCGTAGACCGTGCACCATGAGCAC	310	349	330	1.9184	CTGTTGCATAGTTCACGCCGTCCTCCAGAACCCGGACACC	801	840	821	1.4056	531
Ref244	Panigrahi A.K., Roca J., Acharya S.K., Jameel S., Panda S.K.	Genotype determination of hepatitis C virus from Northern India: Identification of a new subtype	1996	Journal of Medical Virology	48	2	191	http://www.scopus.com/inward/record.url?eid=2-s2.0-0030020144&partnerID=40&md5=ffc61296bc06d302059ce6fdbcb0fcb7	8835354		Genotyping/classification	GGAATCTGCCCGGTTGCTCTTTTCTATCT	841	870	856	1.4252	GTTGTGGGCGACCAGTTCATCATCA	1306	1330	1319	1.7608	490
Ref244	Panigrahi A.K., Roca J., Acharya S.K., Jameel S., Panda S.K.	Genotype determination of hepatitis C virus from Northern India: Identification of a new subtype	1996	Journal of Medical Virology	48	2	191	http://www.scopus.com/inward/record.url?eid=2-s2.0-0030020144&partnerID=40&md5=ffc61296bc06d302059ce6fdbcb0fcb7	8835354		Genotyping/classification	CTCAACCGTCACTGAACAGGACAT	8276	8299	8288	1.7992	CCACGACTAGATCATCTCCG	8569	8589	8580	1.554	314
Ref245	Park Y.S., Lee K.O., Oh M.J., Chai Y.G.	Distribution of genotypes in the 5' untranslated region of hepatitis C virus in Korea	1998	Journal of Medical Microbiology	47	7	643	http://www.scopus.com/inward/record.url?eid=2-s2.0-0031811340&partnerID=40&md5=437f5664e8310d793f071c6682e25dd7	9839569		Epidemiology	TTCACGCAGAAAGCGTCTAG	63	82	73	1.9576	TATCAGGCAGTACCACAAGG;	279	298	289	1.9584	236
Ref246	Peig Ginabreda M.G., Yoshida C.F.T., Niel C.	Genomic characterization of Brazilian hepatitis C virus genotypes 1a and 1b	1997	Brazilian Journal of Medical and Biological Research	30	3	339	http://www.scopus.com/inward/record.url?eid=2-s2.0-0031089036&partnerID=40&md5=81b3cdbde773371d1e0f9981955c19e7	9246231		Genotyping/classification	TCTGTTCCGCCATGTACGTGGGGGA	1153	1177	1166	1.6156	TCCACGACGGCTTGTGGGATCCGGA	1354	1378	1367	1.5388	226
Ref247	Pernas M., Bartolome J., Castillo J., Quiroga J.A., Pardo M., Carreno V.	Sequence of non-structural regions 3 and 5 of hepatitis C virus genomes from Spanish patients: Existence of a predominant variant related to type 1b	1995	Journal of General Virology	76	2	415	http://www.scopus.com/inward/record.url?eid=2-s2.0-0028860308&partnerID=40&md5=28fea3a78f337ec7ed3c002aa71eb887	7844561	New PCR, plus [Ref440]	Genotyping/classification	GGCTATACCGGCGACTTCGA	4668	4687	4678	1.6212	AGCTCATACCAAGCACAGCC	4911	4930	4921	1.6476	263
Ref247	Pernas M., Bartolome J., Castillo J., Quiroga J.A., Pardo M., Carreno V.	Sequence of non-structural regions 3 and 5 of hepatitis C virus genomes from Spanish patients: Existence of a predominant variant related to type 1b	1995	Journal of General Virology	76	2	415	http://www.scopus.com/inward/record.url?eid=2-s2.0-0028860308&partnerID=40&md5=28fea3a78f337ec7ed3c002aa71eb887	7844561	New PCR, plus [Ref440]	Genotyping/classification	ATGGGGCAAAGGACGTCCG	7909	7927	7919	1.8124	TACCTAGTCATAGCCTCCGTGAAG	8615	8638	8627	1.5832	730
Ref248	Pham S.T., Bull R.A., Bennett J.M., Rawlinson W.D., Dore G.J., Lloyd A.R., White P.A.	Frequent multiple hepatitis C virus infections among injection drug users in a prison setting	2010	Hepatology	52	5	1564	http://www.scopus.com/inward/record.url?eid=2-s2.0-78049496042&partnerID=40&md5=5c8fdce945ad683f17e13c9c5c099fb5	21038409		Genotyping/classification	TGCGGMTTCGCCGACCTCATGG	723	744	734	1.6152	GTGCCARCTGCCRTTGGTGTT	1584	1604	1595	1.3464	882
Ref250	Plamondon M., Labbe A.-C., Frost E., Deslandes S., Alves A.C., Bastien N., Pepin J.	Hepatitis C virus infection in Guinea-Bissau: A sexually transmitted genotype 2 with parenteral amplification?	2007	PLoS ONE	2	4		http://www.scopus.com/inward/record.url?eid=2-s2.0-55449083234&partnerID=40&md5=42bb511c832b890bf284f66259b6074d	17440608		Genotyping/classification	TATGATACCCGCTGCTTTGACTCGAC	8256	8281	8269	1.8316	CTGGTCATAGCCTCCGTGAAGGCTCTCAGG	8606	8635	8621	1.6928	380
Ref251	Pozzato G., Kaneko S., Moretti M., Croce L.S., Franzin F., Unoura M., Bercich L., Tiribelli C., Crovatto M., Santini G., Kobayashi K.	Different genotypes of hepatitis C virus are associated with different severity of chronic liver disease	1994	Journal of Medical Virology	43	3	291	http://www.scopus.com/inward/record.url?eid=2-s2.0-0028291984&partnerID=40&md5=fd775073d1e734f0515970935c2573ba	7931191		Genotyping/classification	GACGAATTCCTTCCTTACATCGAACAAGG	5474	5503	5489	1.628	ATGGGATCCTTCCACATGTGCTTCGCCCAG	5621	5647	5635	1.7244	174
Ref252	Pozzato G., Moretti M., Saveria L., Croce S., Sasso F., Kaneko S., Unoura M., Kobayashi K., Crovatto M., Santini G., Tiribelli C.	Interferon therapy in chronic hepatitis C virus: Evidence of different outcome with respect to different viral strains	1995	Journal of Medical Virology	45	4	445	http://www.scopus.com/inward/record.url?eid=2-s2.0-0028904999&partnerID=40&md5=c46cb4f1ceddcf14191e19edb4a9ee23	7666045		Treatment response/resistance	GACGAATTCCTTCCTTACATCGAACAAGGA	5474	5504	5490	1.6452	ATGGGATCCTTCCACATGTGCTTCGCCCAG	5621	5647	5635	1.7244	174
Ref253	Prescott L.E., Berger A., Pawlotsky J.-M., Conjeevaram P., Pike I., Simmonds P.	Sequence analysis of hepatitis C virus variants producing discrepant results with two different genotyping assays	1997	Journal of Medical Virology	53	3	237	http://www.scopus.com/inward/record.url?eid=2-s2.0-0031409473&partnerID=40&md5=15dff81aaa9f291cbd99aeab8e67135f	9365889	New PCR, plus [Ref397] plus [Ref403]	Genotyping/classification	TTCACGCAGAAAGCGTCTAG	63	82	73	1.9576	CACTCTCGAGCACCCTATCAGGCAGT	288	313	301	1.9248	251
Ref253	Prescott L.E., Berger A., Pawlotsky J.-M., Conjeevaram P., Pike I., Simmonds P.	Sequence analysis of hepatitis C virus variants producing discrepant results with two different genotyping assays	1997	Journal of Medical Virology	53	3	237	http://www.scopus.com/inward/record.url?eid=2-s2.0-0031409473&partnerID=40&md5=15dff81aaa9f291cbd99aeab8e67135f	9365889	New PCR, plus [Ref397] plus [Ref403]	Genotyping/classification	AGGTCTCGTAGACCGTGCATCATG	321	344	333	1.9112	CACGTAAGGGTATCGATGAC	705	724	715	1.5424	404
Ref253	Prescott L.E., Berger A., Pawlotsky J.-M., Conjeevaram P., Pike I., Simmonds P.	Sequence analysis of hepatitis C virus variants producing discrepant results with two different genotyping assays	1997	Journal of Medical Virology	53	3	237	http://www.scopus.com/inward/record.url?eid=2-s2.0-0031409473&partnerID=40&md5=15dff81aaa9f291cbd99aeab8e67135f	9365889	New PCR, plus [Ref397] plus [Ref403]	Genotyping/classification	CTGGAGGTCGTCACTAGCACCTGG	5298	5321	5310	1.7724	TTCCACATGTGYTTCGCCCAGA	5620	5641	5631	1.7684	344
Ref254	Prescott L.E., Simmonds P., Lai C.L., Chan N.K., Pike I., Yap P.L., Lin C.K.	Detection and clinical features of hepatitis C virus type 6 infections in blood donors from Hong Kong	1996	Journal of Medical Virology	50	2	168	http://www.scopus.com/inward/record.url?eid=2-s2.0-0029862049&partnerID=40&md5=1527292f020b357df1a2aebd4087605f	8915883		Genotyping/classification	AGGTCTCGTAGACCGTGCATCATG	321	344	333	1.9112	CACGTAAGGGTATCGATGAC	705	724	715	1.5424	404
Ref254	Prescott L.E., Simmonds P., Lai C.L., Chan N.K., Pike I., Yap P.L., Lin C.K.	Detection and clinical features of hepatitis C virus type 6 infections in blood donors from Hong Kong	1996	Journal of Medical Virology	50	2	168	http://www.scopus.com/inward/record.url?eid=2-s2.0-0029862049&partnerID=40&md5=1527292f020b357df1a2aebd4087605f	8915883		Genotyping/classification	RTCCTCGTGGGTGGAGTCCTNGC	5322	5344	5334	1.8404	TTCCACATRTGYTTNKSCCAGAA	5619	5641	5631	1.7684	320
Ref255	Qu D., Hantz O., Gouy M., Vitvitski L., Li -s. J., Berby F., Tong -p. S., Trepo C.	Heterogeneity of hepatitis C virus genotypes in France	1994	Journal of General Virology	75	5	1063	http://www.scopus.com/inward/record.url?eid=2-s2.0-0028281047&partnerID=40&md5=b0cca88741c824b935198f7c6e21c953	8176368		Epidemiology	GCCTGATAGGGTGCTTGCGAGTG	291	313	303	1.9232	TCCCTGTTGCATAGTTCACGCCGT	820	843	832	1.4356	553
Ref255	Qu D., Hantz O., Gouy M., Vitvitski L., Li -s. J., Berby F., Tong -p. S., Trepo C.	Heterogeneity of hepatitis C virus genotypes in France	1994	Journal of General Virology	75	5	1063	http://www.scopus.com/inward/record.url?eid=2-s2.0-0028281047&partnerID=40&md5=b0cca88741c824b935198f7c6e21c953	8176368		Epidemiology	GGTTGCTCTTTCTCTATCTTCCT	852	874	864	1.3876	GGTGCCAACTGCCGTTGGTGTT	1584	1605	1595	1.3464	754
Ref255	Qu D., Hantz O., Gouy M., Vitvitski L., Li -s. J., Berby F., Tong -p. S., Trepo C.	Heterogeneity of hepatitis C virus genotypes in France	1994	Journal of General Virology	75	5	1063	http://www.scopus.com/inward/record.url?eid=2-s2.0-0028281047&partnerID=40&md5=b0cca88741c824b935198f7c6e21c953	8176368		Epidemiology	GACAGTCGACTTCAGCCTTGA	4721	4741	4732	1.6432	TCATAGCACTCACAGAGGAC	4887	4906	4897	1.562	186
Ref256	Quarleri J.F., Bussy M.V., Mathet V.L., Ruiz V., Iacono R., Lu L., Robertson B.H., Oubina J.R.	In vitro detection of dissimilar amounts of hepatitis C virus (HCV) subtype-specific RNA genomes in mixes prepared from sera of persons infected with a single HCV genotype	2003	Journal of Clinical Microbiology	41	6	2727	http://www.scopus.com/inward/record.url?eid=2-s2.0-0038518260&partnerID=40&md5=c21e4fc888646df9560bcac60654d21a	12791916	New primers plus, [Ref437]	Genotyping/classification	TTCACGCAGAAAGCGTCTAG	63	82	73	1.9576	GCTGAGCCCAGGACCGGTCT	557	576	567	1.772	514
Ref256	Quarleri J.F., Bussy M.V., Mathet V.L., Ruiz V., Iacono R., Lu L., Robertson B.H., Oubina J.R.	In vitro detection of dissimilar amounts of hepatitis C virus (HCV) subtype-specific RNA genomes in mixes prepared from sera of persons infected with a single HCV genotype	2003	Journal of Clinical Microbiology	41	6	2727	http://www.scopus.com/inward/record.url?eid=2-s2.0-0038518260&partnerID=40&md5=c21e4fc888646df9560bcac60654d21a	12791916	New primers plus, [Ref437]	Genotyping/classification	CTCAACCGTCACTGAACAGGACAT	8276	8299	8288	1.7992	CCACGACTAGATCATCTCCG	8569	8589	8580	1.554	314
Ref257	Querenghi F., Yu Q., Billaud G., Maertens G., Trepo C., Zoulim F.	Evolution of hepatitis C virus genome in chronically infected patients receiving ribavirin monotherapy	2001	Journal of Viral Hepatitis	8	2	120	http://www.scopus.com/inward/record.url?eid=2-s2.0-0035076685&partnerID=40&md5=ad8bc33645ed33d33ed1ea1e75a85d74	11264732		evolution	GCTTGGGATATGATGATGAACTGGTC	1296	1321	1309	1.7116	TGCCACCTGCCATTGGTGTT	1584	1603	1594	1.2892	308
Ref257	Querenghi F., Yu Q., Billaud G., Maertens G., Trepo C., Zoulim F.	Evolution of hepatitis C virus genome in chronically infected patients receiving ribavirin monotherapy	2001	Journal of Viral Hepatitis	8	2	120	http://www.scopus.com/inward/record.url?eid=2-s2.0-0035076685&partnerID=40&md5=ad8bc33645ed33d33ed1ea1e75a85d74	11264732		evolution	CCACATTACAGCAGAGACGGC	6878	6898	6889	1.5548	GTTTCCGCCCATCTCCTGCCG	7041	7061	7052	1.7696	184
Ref257	Querenghi F., Yu Q., Billaud G., Maertens G., Trepo C., Zoulim F.	Evolution of hepatitis C virus genome in chronically infected patients receiving ribavirin monotherapy	2001	Journal of Viral Hepatitis	8	2	120	http://www.scopus.com/inward/record.url?eid=2-s2.0-0035076685&partnerID=40&md5=ad8bc33645ed33d33ed1ea1e75a85d74	11264732		evolution	GTCACCGAGAGTGACATCCGT	8283	8303	8294	1.7824	CTCGTAGGCTCGCCGCGTCCTC	8592	8613	8603	1.7288	331
Ref258	Radkowski M., Wang L.-F., Vargas H., Wilkinson J., Rakela J., Laskus T.	Changes in hepatitis C virus population in serum and peripheral blood mononuclear cells in chronically infected patients receiving liver graft from infected donors	2001	Transplantation	72	5	833	http://www.scopus.com/inward/record.url?eid=2-s2.0-0035884429&partnerID=40&md5=9c35caf2bd7b9089ba9222b14526b504	11571446		evolution	CTCCACAGTCACTGAGAGCGACAT	8276	8299	8288	1.7992	CGCTTTCACAGATAACGACTAAGT	8557	8580	8569	1.5864	305
Ref259	Radkowski M., Wilkinson J., Nowicki M., Adair D., Vargas H., Ingui C., Rakela J., Laskus T.	Search for hepatitis C virus negative-strand RNA sequences and analysis of viral sequences in the central nervous system: Evidence of replication	2002	Journal of Virology	76	2	600	http://www.scopus.com/inward/record.url?eid=2-s2.0-0036137799&partnerID=40&md5=9fb586fc9cfc0ecde8133f441cc68de3	11752151	[Ref170], plus [Ref168]	evolution	ACTGTCTTCACGCAGAAAGCGTC	57	79	69	1.9564	CAAGCACCCTATCAGGCAGTACC	285	307	297	1.9668	251
Ref259	Radkowski M., Wilkinson J., Nowicki M., Adair D., Vargas H., Ingui C., Rakela J., Laskus T.	Search for hepatitis C virus negative-strand RNA sequences and analysis of viral sequences in the central nervous system: Evidence of replication	2002	Journal of Virology	76	2	600	http://www.scopus.com/inward/record.url?eid=2-s2.0-0036137799&partnerID=40&md5=9fb586fc9cfc0ecde8133f441cc68de3	11752151	[Ref170], plus [Ref168]	evolution	CTCCACAGTCACTGAGAGCGACAT	8276	8299	8288	1.7992	CGCTTTCACAGATAACGACTAAGT	8557	8580	8569	1.5864	305
Ref260	Raghuraman S., Abraham P., Sridharan G., Daniel H.D., Ramakrishna B.S., Shaji R.V.	HCV genotype 4 - An emerging threat as a cause of chronic liver disease in Indian (south) patients	2004	Journal of Clinical Virology	31	4	253	http://www.scopus.com/inward/record.url?eid=2-s2.0-5644296267&partnerID=40&md5=a6cd56fafb678a9c7fe51f88d7f300ea	15494265	[Ref232]	Genotyping/classification	AGACCGTGCACCATGAGCAC	330	349	340	1.8664	TACGCCGGGGGTCATTGGGGCCCCA	660	684	673	1.6404	355
Ref261	Ramachandran S., Xia G.-l., Ganova-Raeva L.M., Nainan O.V., Khudyakov Y.	End-point limiting-dilution real-time PCR assay for evaluation of hepatitis C virus quasispecies in serum: Performance under optimal and suboptimal conditions	2008	Journal of Virological Methods	151	2	217	http://www.scopus.com/inward/record.url?eid=2-s2.0-46749091188&partnerID=40&md5=b9aaa4c10fa1c1af45a4af01df860c74	18571738		evolution	GGATATGATGATGAACTGGT	1301	1320	1311	1.694	ATGTGCCAGCTGCCGTTGGTGT	1585	1606	1596	1.3812	306
Ref262	Ray S.C., Mao Q., Lanford R.E., Bassett S., Laeyendecker O., Wang Y.-M., Thomas D.L.	Hypervariable region 1 sequence stability during hepatitis C virus replication in chimpanzees	2000	Journal of Virology	74	7	3058	http://www.scopus.com/inward/record.url?eid=2-s2.0-0034011434&partnerID=40&md5=126a26d27f6f35dd78d0b62ec616280b	10708420	[Ref436]	evolution	AACCTTCCTGGTTGCTCTTTCTCTAT	843	868	856	1.4252	GAAGCAATAYTGYGGRCCACA	1848	1868	1859	1.5684	1026
Ref263	Re V.E., Culasso A.C.A., Mengarelli S., Farias A.A., Fay F., Pisano M.B., Elbarcha O., Contigiani M.S., Campos R.H.	Phylodynamics of hepatitis C virus subtype 2c in the province of CÃ³rdoba, Argentina	2011	PLoS ONE	6	5		http://www.scopus.com/inward/record.url?eid=2-s2.0-79956188449&partnerID=40&md5=ba5b6c4451d1ebbc6fdc0b066ea9c446	21611129	New PCR, plus [Ref435]	Epidemiology	GGGGGCGTGGGCMAARGT	1436	1453	1445	1.7828	TGAARCAGTCYGTGGGGCA	2082	2100	2092	1.3436	665
Ref263	Re V.E., Culasso A.C.A., Mengarelli S., Farias A.A., Fay F., Pisano M.B., Elbarcha O., Contigiani M.S., Campos R.H.	Phylodynamics of hepatitis C virus subtype 2c in the province of CÃ³rdoba, Argentina	2011	PLoS ONE	6	5		http://www.scopus.com/inward/record.url?eid=2-s2.0-79956188449&partnerID=40&md5=ba5b6c4451d1ebbc6fdc0b066ea9c446	21611129	New PCR, plus [Ref435]	Epidemiology	GATACCCGCTGCTTTGACTC	8259	8278	8269	1.8316	CCT CCG TGA AGG CTC TCA G	8607	8625	8617	1.6436	367
Ref264	Rolfe K.J., Alexander G.J.M., Wreghitt T.G., Parmar S., Jalal H., Curran M.D.	A real-time Taqman method for hepatitis C virus genotyping	2005	Journal of Clinical Virology	34	2	115	http://www.scopus.com/inward/record.url?eid=2-s2.0-24644445179&partnerID=40&md5=c9c6fa00efea6c652e015aa489788285	15893957		Genotyping/classification	TTCAGCCAGAAAGCGTCTAG	63	82	73	1.9576	CACTCGCAAGCACCCTATCAGGCAGT	288	313	301	1.9248	251
Ref265	Roque-Afonso A.M., Ferey M.-P., Poveda J.-D., Marchadier E., Dussaix E.	Performance of TRUGENEâ„¢ hepatitis C virus 5â€² noncoding genotyping kit, a new CLIPâ„¢ sequencing-based assay for hepatitis C virus genotype determination	2002	Journal of Viral Hepatitis	9	5	385	http://www.scopus.com/inward/record.url?eid=2-s2.0-0036025217&partnerID=40&md5=66cfeeac8db9ca50a5aeb7ef641266ba	12225334	TrueGene 5'NC [Ref266]	Genotyping/classification		96						278			183
Ref266	Ross RS, Viazov SO, Holtzer CD, Beyou A, Monnet A, Mazure C, Roggendorf M.	Genotyping of hepatitis C virus isolates using CLIP sequencing.	2000	J Clin Microbiol	38	10	3581	/pubmed/11015367	11015367	TruGene 5'NC [Ref266], plus [Ref79], and [Ref344]	Genotyping/classification		96						278			183
Ref266	Ross RS, Viazov SO, Holtzer CD, Beyou A, Monnet A, Mazure C, Roggendorf M.	Genotyping of hepatitis C virus isolates using CLIP sequencing.	2000	J Clin Microbiol	38	10	3581	/pubmed/11015367	11015367	TruGene 5'NC [Ref266], plus [Ref79], and [Ref344]	Genotyping/classification	TAGATTGGGTGTGCGCGCGA	467	486	477	1.92208	AGGTTCCCTGTTGCATAATT	828	847	838	1.452	381
Ref266	Ross RS, Viazov SO, Holtzer CD, Beyou A, Monnet A, Mazure C, Roggendorf M.	Genotyping of hepatitis C virus isolates using CLIP sequencing.	2000	J Clin Microbiol	38	10	3581	/pubmed/11015367	11015367	TruGene 5'NC [Ref266], plus [Ref79], and [Ref344]	Genotyping/classification	TGGGGATCCCGTATGATACCCGCTGCTTTGA	8245	8275	8261	1.7908	GGCGGAATTCCTGGTCATAGCCTCCGTGAA	8616	8645	8631	1.5956	401
Ref267	Rossi L., Leveri M., Marinelli D., Belli L., Civardi E., Silini E.M.	An heteroduplex mobility analysis assay based on capillary electrophoresis for the study of HCV quasispecies	2003	Journal of Virological Methods	110	1	37	http://www.scopus.com/inward/record.url?eid=2-s2.0-0038580799&partnerID=40&md5=1c1675eeec65e5183d91721780669760	12757919		evolution	ATGCTGGGTACGTGGGCTAAGGT-	1431	1453	1443	1.8124	TTGATGTGCCAACTGCCATTGGT-	1587	1609	1599	1.3748	179
Ref268	Roth W.K., Lee J.-H., Ruster B., Zeuzem S.	Comparison of two quantitative hepatitis C virus reverse transcriptase PCR assays	1996	Journal of Clinical Microbiology	34	2	261	http://www.scopus.com/inward/record.url?eid=2-s2.0-0030049586&partnerID=40&md5=06c953f41d2b95a4a4e9598c67041ab7	8788997	[Ref386]	Genotyping/classification	CTCCACAGTCACTGAGAGCGACATCCGTAC	8276	8305	8291	1.7776	ATAGCCTCCGTGAAGGCTCTCAGGCTCGCC	8600	8629	8615	1.6808	354
Ref269	Ruster B., Zeuzem S., Roth W.K.	Hepatitis C virus sequences encoding truncated core proteins detected in a hepatocellular carcinoma	1996	Biochemical and Biophysical Research Communications	219	3	911	http://www.scopus.com/inward/record.url?eid=2-s2.0-0343930741&partnerID=40&md5=706c45d19f89ce42d2ead6d17acac1e5	8645278		evolution	ACGCAGAAAGCGTCTAGCCATGGCGTTAGT	66	95	81	1.956	TCCCGGGGCACTCGCAAGCACCCTATCAGG	292	321	307	1.926	256
Ref269	Ruster B., Zeuzem S., Roth W.K.	Hepatitis C virus sequences encoding truncated core proteins detected in a hepatocellular carcinoma	1996	Biochemical and Biophysical Research Communications	219	3	911	http://www.scopus.com/inward/record.url?eid=2-s2.0-0343930741&partnerID=40&md5=706c45d19f89ce42d2ead6d17acac1e5	8645278		evolution	AGGAATCCTGGTACTGCCTGATAGGGTGCT	276	305	291	1.9568	AGCCACGGGGAGACAGGAGCCATCC	624	648	637	1.7724	373
Ref269	Ruster B., Zeuzem S., Roth W.K.	Hepatitis C virus sequences encoding truncated core proteins detected in a hepatocellular carcinoma	1996	Biochemical and Biophysical Research Communications	219	3	911	http://www.scopus.com/inward/record.url?eid=2-s2.0-0343930741&partnerID=40&md5=706c45d19f89ce42d2ead6d17acac1e5	8645278		evolution	CTCCACAGTCACTGAGAGCGACATCCGTAC	8276	8305	8291	1.7776	GGCTATAAGGACGCTAAAGAAATGG	8882	8906	8895	1.772	631
Ref270	Saito T., Ito T., Ishiko H., Yonaha M., Morikawa K., Miyokawa A., Mitamura K.	Sequence analysis of PePHD within HCV E2 region and correlation with resistance of interferon therapy in Japanese patients infected with HCV genotypes 2a and 2b	2003	American Journal of Gastroenterology	98	6	1377	http://www.scopus.com/inward/record.url?eid=2-s2.0-0038649813&partnerID=40&md5=ef0a1459404f6282517ad464fbd48c4f	12818284	[Ref078]	Treatment response/resistance	CTYTGGCACTACCCCTGCAC	2184	2203	2194	1.4104	CACRATGTTCTGRTGGAGRT	2413	2432	2423	1.7712	249
Ref270	Saito T., Ito T., Ishiko H., Yonaha M., Morikawa K., Miyokawa A., Mitamura K.	Sequence analysis of PePHD within HCV E2 region and correlation with resistance of interferon therapy in Japanese patients infected with HCV genotypes 2a and 2b	2003	American Journal of Gastroenterology	98	6	1377	http://www.scopus.com/inward/record.url?eid=2-s2.0-0038649813&partnerID=40&md5=ef0a1459404f6282517ad464fbd48c4f	12818284	[Ref078]	Treatment response/resistance	CAGGTACGCTCCGGCGTGCA	4948	4968	4959	1.7124	GGGGCCTTGGTAGGTGGCAA	7287	7305	7297	1.754	2358
Ref271	Sakai A., Takikawa S., Thimme R., Meunier J.-C., Spangenberg H.C., Govindarajan S., Farci P., Emerson S.U., Chisari F.V., Purcell R.H., Bukh J.	In vivo study of the HC-TN strain of hepatitis C Virus recovered from a patient with fulminant hepatitis: RNA transcripts of a molecular clone (pHC-TN) are infectious in chimpanzees but not in Huh7.5 cells	2007	Journal of Virology	81	13	7208	http://www.scopus.com/inward/record.url?eid=2-s2.0-34250865507&partnerID=40&md5=c425c4064be38dc1ffa1be8e2aeb21dd	17409145	[Ref362] and [Ref432]	Natural history	5'Race	1				9646		9646		1.7184	9646
Ref272	Sakuma I., Enomoto N., Kurosaki M., Izumi N., Marumo F., Sato C.	Differential effect of interferon on hepatitis C virus 1b quasispecies in the nonstructural protein 5A gene	1999	Journal of Infectious Diseases	180	4	1001	http://www.scopus.com/inward/record.url?eid=2-s2.0-0033375004&partnerID=40&md5=af0acd62cd48e49872ab73c370575ae2	10479124	[Ref402]	Treatment response/resistance	CAGGTACGCTCCGGCGTGCA	4948	4968	4959	1.7124	GGGGCCTTGGTAGGTGGCAA	7287	7305	7297	1.754	2358
Ref273	Sakuma I., Enomoto N., Kurosaki M., Marumo F., Sato C.	Selection of hepatitis C virus quasispecies during interferon treatment	1996	Archives of Virology	141	10	1921	http://www.scopus.com/inward/record.url?eid=2-s2.0-0029802735&partnerID=40&md5=e5859026ce9bc6fca13169d6ba0a86d6	8920825		Treatment response/resistance	CTATTCCATGGTAGGGAACTGGGCTAAGGT	1424	1453	1439	1.8144	TTAGGGCGGTGCGGTTGATGTGCCA	1599	1623	1612	1.5172	200
Ref274	Samokhvalov E.I., Hijikata M., Gylka R.I., Lvov D.K., Mishiro S.	Full-genome nucleotide sequence of a hepatitis C virus variant (Isolate name VAT96) representing a new subtype within the genotype 2 (Arbitrarily 2k)	2000	Virus Genes	20	2	183	http://www.scopus.com/inward/record.url?eid=2-s2.0-0034038718&partnerID=40&md5=af07446c26f16b3031eaa91ba39e4521	10872881		Genotyping/classification	5'RACE	1				X-tail		9464			9464
Ref275	Sandres-Saune K., Deny P., Pasquier C., Thibaut V., Duverlie G., Izopet J.	Determining hepatitis C genotype by analyzing the sequence of the NS5b region	2003	Journal of Virological Methods	109	2	187	http://www.scopus.com/inward/record.url?eid=2-s2.0-0242669951&partnerID=40&md5=1c8c5ebb988bfaaa991540e062e7acf5	12711062	[Ref079], and [Ref414], and Trugene Genotyping instruction kit insert [Ref266]	Genotyping/classification		96						278			183
Ref275	Sandres-Saune K., Deny P., Pasquier C., Thibaut V., Duverlie G., Izopet J.	Determining hepatitis C genotype by analyzing the sequence of the NS5b region	2003	Journal of Virological Methods	109	2	187	http://www.scopus.com/inward/record.url?eid=2-s2.0-0242669951&partnerID=40&md5=1c8c5ebb988bfaaa991540e062e7acf5	12711062	[Ref079], and [Ref414], and Trugene Genotyping instruction kit insert [Ref266]	Genotyping/classification	TGGGGATCCCGTATGATACCCGCTGCTTTGA	8245	8275	8261	1.7908	GGCGGAATTCCTGGTCATAGCCTCCGTGAA	8616	8645	8631	1.5956	401
Ref276	Schiappa D.A., Mittal C., Brown J.A., Mika B.P.	Relationship of hepatitis C genotype 1 NS5A sequence mutations to early phase viral kinetics and interferon effectiveness	2002	Journal of Infectious Diseases	185	7	868	http://www.scopus.com/inward/record.url?eid=2-s2.0-0036534466&partnerID=40&md5=a2f73e7df8db6c4920c403a5d064899a	11920310	[Ref511]	Treatment response/resistance	CCTCCCATATAACAGCAGAG	6874	6893	6884	1.5072	CGAAGGAGTCCAGAATCACC	7091	7110	7101	1.8444	237
Ref278	Schroter M., Feucht H.-H., Schafer P., Zollner B., Laufs R.	Serological determination of hepatitis C virus subtypes 1a, 1b, 2a, 2b, 3a, and 4a by a recombinant immunoblot assay	1999	Journal of Clinical Microbiology	37	8	2576	http://www.scopus.com/inward/record.url?eid=2-s2.0-17144461570&partnerID=40&md5=e40012dbfdff81a06ed9482239d43214	10405404		Genotyping/classification	ACTGAATTCTCGTATGATACCCGC	8244	8267	8256	1.7704	GTCAAGCTTCACAGATAACG	8564	8583	8574	1.5688	340
Ref279	Schroter M., Feucht H.-H., Zollner B., Laufs R.	Serological differentiation between HCV subtypes 1a and 1b by a recombinant immunoblot assay	1998	Microbiology and Immunology	42	5	387	http://www.scopus.com/inward/record.url?eid=2-s2.0-0031780072&partnerID=40&md5=f0537eac73178d0f5b68454133f88c72	9654371		Genotyping/classification	ACTGAATTCTCGTATGATACCCGC	8244	8267	8256	1.7704	GTCAAGCTTCACAGATAACG	8564	8583	8574	1.5688	340
Ref280	Schroter M., Zollner B., Schafer P., Landt O., Lass U., Laufs R., Feucht H.-H.	Genotyping of hepatitis C virus types 1, 2, 3, and 4 by a one-step LightCycler method using three different pairs of hybridization probes	2002	Journal of Clinical Microbiology	40	6	2046	http://www.scopus.com/inward/record.url?eid=2-s2.0-0036259893&partnerID=40&md5=ef518bf27b6ecb863c39f59c7edb1fd1	12037062	[Ref431]	Genotyping/classification	ACTGAATTCTCGTATGATACCC	8244	8265	8255	1.7612	GTCAAGCTTCACAGATAAC	8565	8583	8575	1.5804	340
Ref281	Sekiya H., Kato N., Ootsuyama Y., Nakazawa T., Yamauchi K., Shimotohno K.	Genetic alterations of the putative envelope proteins encoding region of the hepatitis C virus in the progression to relapsed phase from acute hepatitis: humoral immune response to hypervariable region 1	1994	International Journal of Cancer	57	5	664	http://www.scopus.com/inward/record.url?eid=2-s2.0-0028355846&partnerID=40&md5=fe59388c514e53ca929892fe9dee7865	7515022	[Ref412]	evolution	GTGAACTATGCAACAGGGAA	825	844	835	1.474	GTTCCCCACCATGAATAGTA	1422	1442	1433	1.7488	618
Ref281	Sekiya H., Kato N., Ootsuyama Y., Nakazawa T., Yamauchi K., Shimotohno K.	Genetic alterations of the putative envelope proteins encoding region of the hepatitis C virus in the progression to relapsed phase from acute hepatitis: humoral immune response to hypervariable region 1	1994	International Journal of Cancer	57	5	664	http://www.scopus.com/inward/record.url?eid=2-s2.0-0028355846&partnerID=40&md5=fe59388c514e53ca929892fe9dee7865	7515022	[Ref412]	evolution	ATTCCATGGTGGGGAACTGG	1426	1445	1436	1.8068	GGGGTGAAGCAATACACTGG	1854	1873	1864	1.5528	448
Ref281	Sekiya H., Kato N., Ootsuyama Y., Nakazawa T., Yamauchi K., Shimotohno K.	Genetic alterations of the putative envelope proteins encoding region of the hepatitis C virus in the progression to relapsed phase from acute hepatitis: humoral immune response to hypervariable region 1	1994	International Journal of Cancer	57	5	664	http://www.scopus.com/inward/record.url?eid=2-s2.0-0028355846&partnerID=40&md5=fe59388c514e53ca929892fe9dee7865	7515022	[Ref412]	evolution	GGTCCAGTGTATTGCTTCAC	1851	1870	1861	1.5664	TCTCCTCGAGTCCAATTGCA	2271	2290	2281	1.5004	440
Ref281	Sekiya H., Kato N., Ootsuyama Y., Nakazawa T., Yamauchi K., Shimotohno K.	Genetic alterations of the putative envelope proteins encoding region of the hepatitis C virus in the progression to relapsed phase from acute hepatitis: humoral immune response to hypervariable region 1	1994	International Journal of Cancer	57	5	664	http://www.scopus.com/inward/record.url?eid=2-s2.0-0028355846&partnerID=40&md5=fe59388c514e53ca929892fe9dee7865	7515022	[Ref412]	evolution	AGCACAGGCTCAATGCTGCA	2251	2270	2261	1.4008	TCTCCTCGAGTCCAATTGCA	2769	2788	2779	1.8248	538
Ref282	Shaw M.L., McLauchlan J., Mills P.R., Patel A.H., McCruden E.A.B.	Characterisation of the differences between hepatitis C virus genotype 3 and 1 glycoproteins	2003	Journal of Medical Virology	70	3	361	http://www.scopus.com/inward/record.url?eid=2-s2.0-0038700761&partnerID=40&md5=35e8496ad46346caff61874ad5b8519d	12766998	New PCR, plus [Ref430]	evolution	GCGCGGATCCAGATCTGGGAGGTCTCGTAGACCGTG)	307	337	323	1.8856	ATTTATTTAAGAAGCCGAAGAGGACCAAG	3026	3055	3041	1.6208	2749
Ref282	Shaw M.L., McLauchlan J., Mills P.R., Patel A.H., McCruden E.A.B.	Characterisation of the differences between hepatitis C virus genotype 3 and 1 glycoproteins	2003	Journal of Medical Virology	70	3	361	http://www.scopus.com/inward/record.url?eid=2-s2.0-0038700761&partnerID=40&md5=35e8496ad46346caff61874ad5b8519d	12766998	New PCR, plus [Ref430]	evolution	CCCTGTGAGCCAGAACCGGA	6822	6841	6832	1.5736	GAGTATGACATGGAGCAGCA	7596	7615	7606	1.8276	794
Ref283	Sherman K.E., Mendenhall C., Thee D.L., O'Brien J., Rouster S.D.	Hepatitis C serotypes in nonalcoholic and alcoholic patients	1997	Digestive Diseases and Sciences	42	11	2285	http://www.scopus.com/inward/record.url?eid=2-s2.0-0031436250&partnerID=40&md5=172d90afc6931ea0ec629e77d6c5fe01	9398807	[Ref079]	Genotyping/classification	TGGGGATCCCGTATGATACCCGCTGCTTTGA	8245	8275	8261	1.7908	GGCGGAATTCCTGGTCATAGCCTCCGTGAA	8616	8645	8631	1.5956	401
Ref284	Shesheer Kumar M., Venkateswara Rao K., Mohammed Habeebullah C., Dashavantha Reddy V.	Expression of alternate reading frame protein (F1) of hepatitis C virus in Escherichia coli and detection of antibodies for F1 in Indian patients	2008	Infection, Genetics and Evolution	8	3	374	http://www.scopus.com/inward/record.url?eid=2-s2.0-42649120664&partnerID=40&md5=392a7086c1a047fe2d78ea01e5dcb3bf	18280797		evolution	ATTCATATGGCACGAATCCTAAACC	335	361	349	1.8472	ATTAAGCTTACCCAAATTGCGTGACCTGC	682	710	697	1.4836	376
Ref285	Shimizu I., Yao D.-F., Horie C., Yasuda M., Shiba M., Horie T., Nishikado T., Meng X.-Y., Ito S.	Mutations in a hydrophilic part of the core gene of hepatitis C virus in patients with hepatocellular carcinoma in China	1997	Journal of Gastroenterology	32	1	47	http://www.scopus.com/inward/record.url?eid=2-s2.0-0031053566&partnerID=40&md5=c290074d3677a90ff41b3bf82e5a60e8	9058295		evolution	TGATAGGGTGCTTGCGAGTG	294	313	304	1.9296	GTAGGTGACCAGTTCATCAT	1308	1327	1318	1.7544	1034
Ref286	Shirai M., Arichi T., Chen M., Nishioka M., Ikeda K., Takahashi H., Enomoto N., Saito T., Major M.E., Nakazawa T., Akatsuka T., Feinstone S.M., Berzofsky J.A.	T cell recognition of hypervariable region-1 from hepatitis C virus envelope protein with multiple class II MHC molecules in mice and humans: Preferential help for induction of antibodies to the hypervariable region	1999	Journal of Immunology	162	1	568	http://www.scopus.com/inward/record.url?eid=2-s2.0-0032955193&partnerID=40&md5=484162acc966a3082761dbb8186dc43c	9886434	[Ref077]	Natural history	CTATTCCATGGTAGGGAACTGGGCTAAGGT	1424	1453	1439	1.8144	TTAGGGCGGTGCGGTTGATGTGCCA	1599	1623	1612	1.5172	200
Ref288	Shrestha S.M., Tsuda F., Okamoto H., Tokita H., Horikita M., Tanaka T., Miyakawa Y., Mayumi M.	Hepatitis B virus subtypes and hepatitis C virus genotypes in patients with chronic liver disease in Nepal	1994	Hepatology	19	4	805	http://www.scopus.com/inward/record.url?eid=2-s2.0-0347145310&partnerID=40&md5=7697421df586a0f014243566dd485cf3	8138250	[Ref237]	Genotyping/classification	GGGACATGATGATCAACTGG	1300	1319	1310	1.7108	GBGAAGGAATTCACTGGGCCACA	1848	1870	1860	1.5648	571
Ref289	Sistayanarain A, Kunthalert D, Vipsoongnern Y.	A shift in the hepatitis C virus genotype dominance in blood donor samples from Thailand.	2011	Mol Biol Rep	38	7	4287	/pubmed/21113670	21113670	[Ref232]	Genotyping/classification	AGACCGTGCACCATGAGCAC	330	349	340	1.8664	TACGCCGGGGGTCATTGGGGCCCCA	660	684	673	1.6404	355
Ref290	Smith D.B., Mellor J., Jarvis L.M., Davidson F., Kolberg J., Urdea M., Yap P.-L., Simmonds P., Conradie J.D., Neill A.G.S., Dusheiko G.M., Kew M.C., Crookes R., Koshy A., Lin C.K., Lai C., Murray-Lyon I.M., El-Guneid A., Gunaid A.A.	Variation of the hepatitis C virus 5' non-coding region: Implications for secondary structure, virus detection and typing	1995	Journal of General Virology	76	7	1749	http://www.scopus.com/inward/record.url?eid=2-s2.0-0029027606&partnerID=40&md5=f6cc192578c76abdfdaf2d616bc38cce	9049380	[Ref397]	Genotyping/classification	TTCACGCAGAAAGCGTCTAG	63	82	73	1.9576	CACTCTCGAGCACCCTATCAGGCAGT	288	313	301	1.9248	251
Ref292	Spada E., Ciccaglione A.R., Dettori S., Chionne P., Kondili L.A., Amoroso P., Guadagnino V., Greco M., Rapicetta M.	Genotyping HCV isolates from Italy by type-specific PCR assay in the core region	1998	Research in Virology	149	4	209	http://www.scopus.com/inward/record.url?eid=2-s2.0-0032129071&partnerID=40&md5=9cbf77135e8e8f3d5e4d4336389c60bf	9783336		Genotyping/classification		469						731			263
Ref293	Spada E., Sagliocca L., Sourdis J., Garbuglia A.R., Poggi V., De Fusco C., Mele A.	Use of the minimum spanning tree model for molecular epidemiological investigation of a nosocomial outbreak of hepatitis C virus infection	2004	Journal of Clinical Microbiology	42	9	4230	http://www.scopus.com/inward/record.url?eid=2-s2.0-4644291611&partnerID=40&md5=6ffd41f19204badc351a8c97a6cb97de	15365016	[Ref081]	Clustering/transmission	AGCGAATTCAAGCTATGAACCCGGTGTTTAT	1444	1475	1460	1.558	TTTGGATCCTGCAAGGCAACTGGGCCAAGGT	1639	1670	1655	1.4456	227
Ref294	Stamenkovic G., Zerjav S., Velickovic Z.M., Krtolica K., Samardzija V.L., Jemuovic L., Nozic D., Dimitrijevic B.	Distribution of HCV genotypes among risk groups in Serbia	2000	European Journal of Epidemiology	16	10	949	http://www.scopus.com/inward/record.url?eid=2-s2.0-0034457253&partnerID=40&md5=7d43ae0b17a943525c5f5b0d8722ae12	11338127	[Ref429]	Genotyping/classification	GCCATGGCGTTAGTATGAGT	82	101	92	1.9456	CACGGTCTACGAGACCTCCC	318	337	328	1.922	256
Ref295	Stuyver L., Claeys H., Wyseur A., Van Arnhem W., De Beenhouwer H., Uytendaele S., Beckers J., Matthijs D., Leroux-Roels G., Maertens G., De Paepe M.	Hepatitis C virus in a hemodialysis unit: Molecular evidence for nosocomial transmission	1996	Kidney International	49	3	889	http://www.scopus.com/inward/record.url?eid=2-s2.0-9044222119&partnerID=40&md5=e0b1f48c162ceabbd55bb723767fa348	8648934	[Ref296]	Clustering/transmission	CCCTGTGAGGAACTACTGTCTTCACGC	43	69	57	1.94	GGGTATCGATGACCTTACCC	732	751	742	1.5604	709
Ref295	Stuyver L., Claeys H., Wyseur A., Van Arnhem W., De Beenhouwer H., Uytendaele S., Beckers J., Matthijs D., Leroux-Roels G., Maertens G., De Paepe M.	Hepatitis C virus in a hemodialysis unit: Molecular evidence for nosocomial transmission	1996	Kidney International	49	3	889	http://www.scopus.com/inward/record.url?eid=2-s2.0-9044222119&partnerID=40&md5=e0b1f48c162ceabbd55bb723767fa348	8648934	[Ref296]	Clustering/transmission	TGGGGATCCCGTATGATACCCGCTGCTTTGA	8245	8275	8261	1.7908	GGCGGAATTCCTGGTCATAGCCTCCGTGAA	8616	8645	8631	1.5956	401
Ref296	Stuyver L., Van Arnhem W., Wyseur A., Hernandez F., Delaporte E., Maertens G.	Classification of hepatitis C viruses based on phylogenetic analysis of the envelope 1 and nonstructural 5B regions and identification of five additional subtypes	1994	Proceedings of the National Academy of Sciences of the United States of America	91	21	10134	http://www.scopus.com/inward/record.url?eid=2-s2.0-0028061454&partnerID=40&md5=be2f7bf321229ca9a8b0e7661c4f2849	7524083	[Ref410]	Genotyping/classification	TCTAGCCATGGCGTTAGTRYGAGTGT	78	103	91	1.9452	CACTCGCAAGCACCCTATCAGGCAGT	288	313	301	1.9248	236
Ref296	Stuyver L., Van Arnhem W., Wyseur A., Hernandez F., Delaporte E., Maertens G.	Classification of hepatitis C viruses based on phylogenetic analysis of the envelope 1 and nonstructural 5B regions and identification of five additional subtypes	1994	Proceedings of the National Academy of Sciences of the United States of America	91	21	10134	http://www.scopus.com/inward/record.url?eid=2-s2.0-0028061454&partnerID=40&md5=be2f7bf321229ca9a8b0e7661c4f2849	7524083	[Ref410]	Genotyping/classification	TTGGGTAAGGTCATCGATACCCT	696	718	708	1.476	CTATTACCAGTTCATCATCATATCCCA	1299	1325	1313	1.7556	630
Ref296	Stuyver L., Van Arnhem W., Wyseur A., Hernandez F., Delaporte E., Maertens G.	Classification of hepatitis C viruses based on phylogenetic analysis of the envelope 1 and nonstructural 5B regions and identification of five additional subtypes	1994	Proceedings of the National Academy of Sciences of the United States of America	91	21	10134	http://www.scopus.com/inward/record.url?eid=2-s2.0-0028061454&partnerID=40&md5=be2f7bf321229ca9a8b0e7661c4f2849	7524083	[Ref410]	Genotyping/classification	TGGGGATCCCGTATGATACCCGCTGCTTTGA	8245	8275	8261	1.7908	GGCGGAATTCCTGGTCATAGCCTCCGTGAA	8616	8645	8631	1.5956	401
Ref297	Stuyver L., Van Arnhem W., Wyseur A., Maertens G.	Cloning and phylogenetic analysis of the core, E2 and NS3/NS4 regions of the hepatitis C virus type 5a+	1994	Biochemical and Biophysical Research Communications	202	3	1308	http://www.scopus.com/inward/record.url?eid=2-s2.0-0027968519&partnerID=40&md5=b7b06cf97ce9cbfa94f42ae4eb0584b0	7520237	New PCR, plus [Ref428]	Genotyping/classification	TGGGATATGATGATGAACTGGTC	1299	1321	1311	1.694	CCAGGTACAACCGAACCAATTGCC	1980	2003	1992	1.3716	705
Ref297	Stuyver L., Van Arnhem W., Wyseur A., Maertens G.	Cloning and phylogenetic analysis of the core, E2 and NS3/NS4 regions of the hepatitis C virus type 5a+	1994	Biochemical and Biophysical Research Communications	202	3	1308	http://www.scopus.com/inward/record.url?eid=2-s2.0-0027968519&partnerID=40&md5=b7b06cf97ce9cbfa94f42ae4eb0584b0	7520237	New PCR, plus [Ref428]	Genotyping/classification	GTGTGCCAGGACCATC	4989	5004	4997	1.7948	GACATGCATGTCATGATGTA	5271	5290	5281	1.76804	302
Ref298	Stuyver L., Wyseur A., Van Arnhem W., Lunel F., Laurent-Puig P., Pawlotsky J.-M., Kleter B., Bassit L., Nkengasong J., Van Doorn L.-J., Maertens G.	Hepatitis C virus genotyping by means of 5'-UR/core line probe assays and molecular analysis of untypeable samples	1995	Virus Research	38	2011-02-03	137	http://www.scopus.com/inward/record.url?eid=2-s2.0-0028807064&partnerID=40&md5=7f357f2221719df839c5386df99d39ae	8578855	[Ref296], [Ref410] and [Ref79]	Genotyping/classification	CCCTGTGAGGAACTACTGTCTTCACGC	43	69	57	1.94	GGGTATCGATGACCTTACCC	732	751	742	1.5604	709
Ref298	Stuyver L., Wyseur A., Van Arnhem W., Lunel F., Laurent-Puig P., Pawlotsky J.-M., Kleter B., Bassit L., Nkengasong J., Van Doorn L.-J., Maertens G.	Hepatitis C virus genotyping by means of 5'-UR/core line probe assays and molecular analysis of untypeable samples	1995	Virus Research	38	2011-02-03	137	http://www.scopus.com/inward/record.url?eid=2-s2.0-0028807064&partnerID=40&md5=7f357f2221719df839c5386df99d39ae	8578855	[Ref296], [Ref410] and [Ref79]	Genotyping/classification	TGGGGATCCCGTATGATACCCGCTGCTTTGA	8245	8275	8261	1.7908	GGCGGAATTCCTGGTCATAGCCTCCGTGAA	8616	8645	8631	1.5956	401
Ref299	Sugiyama K., Goto K., Miyake Y., Toshihiro-Ando, Oda T., Maniwa H., Li R., Kawabe Y., Wada Y.	Analysis of the hypervariable region of hepatitis C virus E2/NS1 gene in an infant infected by blood transfusion	1997	Pediatric Research	42	2	247	http://www.scopus.com/inward/record.url?eid=2-s2.0-0030878271&partnerID=40&md5=9577df739e593e1ac9e3e3b7076a8c3d	9262231		Clustering/transmission	GGGACATGATGATGATCAACTGG	1300	1319	1310	1.7108	GTGAAGGAATTCACTGGGCCACA	1848	1870	1860	1.5648	571
Ref300	Sugiyama K., Kato N., Nakazawa T., Yonemura Y., Phornphutkul K., Kunakorn M., Petchclai B., Shimotohno K.	Novel genotypes of hepatitis C virus in Thailand	1995	Journal of General Virology	76	9	2323	http://www.scopus.com/inward/record.url?eid=2-s2.0-0029164339&partnerID=40&md5=c18d49ae314f6bf229cf57b7dc5f615d	7561772	New PCR, plus [Ref281]	Epidemiology	AGAGCCATAGTGGTCTGCGG	134	153	144	1.954	CTTTCGCGACCCAACACTAC	258	277	268	1.932	144
Ref300	Sugiyama K., Kato N., Nakazawa T., Yonemura Y., Phornphutkul K., Kunakorn M., Petchclai B., Shimotohno K.	Novel genotypes of hepatitis C virus in Thailand	1995	Journal of General Virology	76	9	2323	http://www.scopus.com/inward/record.url?eid=2-s2.0-0029164339&partnerID=40&md5=c18d49ae314f6bf229cf57b7dc5f615d	7561772	New PCR, plus [Ref281]	Genotyping/classification	CACGAATCCTAAACCTCAAAG	347	367	358	1.8088	GACAGGAGCCATCCTGCCCA	618	637	628	1.77	291
Ref300	Sugiyama K., Kato N., Nakazawa T., Yonemura Y., Phornphutkul K., Kunakorn M., Petchclai B., Shimotohno K.	Novel genotypes of hepatitis C virus in Thailand	1995	Journal of General Virology	76	9	2323	http://www.scopus.com/inward/record.url?eid=2-s2.0-0029164339&partnerID=40&md5=c18d49ae314f6bf229cf57b7dc5f615d	7561772	New PCR, plus [Ref281]	Epidemiology	GCTGCGTGGGAGACAGCTAGACAC	8784	8807	8796	1.656	GTCCTTACTGCCCAGTTGAAGAG	9174	9196	9186	1.6972	413
Ref301	Suzuki F., Chayama K., Nakajima T., Kawasaki T., Kumada H., Yoshimi T.	Case report: Clinical and virological analyses of a patient positive for hepatitis C virus-RNA by branched DNA assay but negative for anti hepatitis C virus antibodies	1997	Journal of Gastroenterology and Hepatology	12	12	869	http://www.scopus.com/inward/record.url?eid=2-s2.0-0031415918&partnerID=40&md5=79af5173d357aaaf90d95838c8ce6172	9504899		evolution	GCCATAGTGGTCTGCGGAAC	137	156	147	1.9536	GTTCCCTGTTGCATAGTT	828	845	837	1.4552	709
Ref302	Takahashi K., Takahashi T., Takahashi S., Watanabe K., Boku S., Matsui S., Arai F., Asakura H.	Difference in quasispecies of the hypervariable region 1 of hepatitis C virus between alcoholic and non-alcoholic patients	2001	Journal of Gastroenterology and Hepatology	16	4	416	http://www.scopus.com/inward/record.url?eid=2-s2.0-0035030608&partnerID=40&md5=5138e7598fcdb1e60dc38f2a951c27e3	11354280		Natural history	TACTACTCCATGGTGGGAGACTGGGC	1422	1447	1435	1.7724	GATGTGCCAGCTGCCATTGG	1588	1607	1598	1.4164	186
Ref303	Tallo T., Norder H., Tefanova V., Krispin T., Schmidt J., Ilmoja M., Orgulas K., Pruunsild K., Priimagi L., Magnius L.O.	Genetic characterization of hepatitis C virus strains in Estonia: Fluctuations in the predominating subtype with time	2007	Journal of Medical Virology	79	4	374	http://www.scopus.com/inward/record.url?eid=2-s2.0-33847612815&partnerID=40&md5=c6a2f6ef5295341b5066ae116a2f9141	17311333		Epidemiology	TAYGAYRCCMGNTGYTTYGAYTCNAC	8256	8281	8269	1.8316	TAYCTVRTCATAGCNTCHGTRAA	8616	8638	8628	1.5672	383
Ref304	Tamalet C., Colson P., Tissot-Dupont H., Henry M., Tourres C., Tivoli N., Botta D., Ravaux I., Poizot-Martin I., Yahi N.	Genomic and phylogenetic analysis of hepatitis C virus isolates: A survey of 535 strains circulating in Southern France	2003	Journal of Medical Virology	71	3	391	http://www.scopus.com/inward/record.url?eid=2-s2.0-0141869931&partnerID=40&md5=d773b0072ac15f4afa179553864e83bf	12966544	New PCR, plus [Ref427]	Epidemiology	TCTAGCCATGGCGTTAGTRYGAGTGT	78	103	91	1.9452	CACTCGCAAGCACCCTATCAGGCAGT	288	313	301	1.9248	236
Ref304	Tamalet C., Colson P., Tissot-Dupont H., Henry M., Tourres C., Tivoli N., Botta D., Ravaux I., Poizot-Martin I., Yahi N.	Genomic and phylogenetic analysis of hepatitis C virus isolates: A survey of 535 strains circulating in Southern France	2003	Journal of Medical Virology	71	3	391	http://www.scopus.com/inward/record.url?eid=2-s2.0-0141869931&partnerID=40&md5=d773b0072ac15f4afa179553864e83bf	12966544	New PCR, plus [Ref427]	Epidemiology	TGGGGATCCCGTATGATACCCGCTGCTTTGA	8245	8275	8261	1.7908	GGCGGAATTCCTGGTCATAGCCTCCGTGAA	8616	8645	8631	1.5956	401
Ref305	Tanabe Y., Nagayama K., Enomoto N., Izumi N., Tazawa J., Kurosaki M., Sakamoto N., Sato C., Watanabe M.	Characteristic sequence changes of hepatitis C virus genotype 2b associated with sustained biochemical response to IFN therapy	2005	Journal of Viral Hepatitis	12	3	251	http://www.scopus.com/inward/record.url?eid=2-s2.0-18344385165&partnerID=40&md5=a2558108a9209fb051b1962e3cc4c889	15850465		Treatment response/resistance		38						9377			9340
Ref306	Tanaka T., Kato N., Cho M.-J., Shimotohno K.	A novel sequence found at the 3' terminus of hepatitis C virus genome	1995	Biochemical and Biophysical Research Communications	215	2	744	http://www.scopus.com/inward/record.url?eid=2-s2.0-0028785460&partnerID=40&md5=4b3915f4e8b6c618af680d246f8122c6	7488017		Genotyping/classification	CCCAACCGGTGAACGGGGAG	9366	9385	9376	1.6272	TGCTGTCGACTACTCGAGCA		9646	4824	1.7184	281
Ref308	Tao Q., Wei L., Chang J., Wang H., Sun Y.	Relationship between interferon therapy and variability in nonstructural gene 5b of hepatitis C virus	1998	Journal of Gastroenterology	33	5	684	http://www.scopus.com/inward/record.url?eid=2-s2.0-0031683453&partnerID=40&md5=410f8efaee2af47c9644e825148c993d	9773933		Treatment response/resistance	GCTGAATTCGACACCCGCTGTTTTG	8251	8274	8263	1.832	CAGAAGCTTTAGTCATAGCCTCCGTG	8618	8643	8631	1.5956	393
Ref309	Tawaraya H., Ohkoshi S., Kuwana K., Watanabe M., Kamimura T., Asakura H.	Epidemiologic survey and genetic analysis of endemic hepatitis C virus infection in a Japanese town with a high prevalence of hepatitis B virus carriers	1995	Journal of Medical Virology	45	4	367	http://www.scopus.com/inward/record.url?eid=2-s2.0-0028946874&partnerID=40&md5=eec964f861df8a8bba28aa76fd01bf45	7545207	[Ref079]	evolution	TGGGGATCCCGTATGATACCCGCTGCTTTGA	8245	8275	8261	1.7908	GGCGGAATTCCTGGTCATAGCCTCCGTGAA	8616	8645	8631	1.5956	401
Ref310	Tellier R., Bukh J., Emerson S.U., Miller R.H., Purcell R.H.	Long PCR and its application to hepatitis viruses: Amplification of hepatitis A, hepatitis B, and hepatitis C virus genomes	1996	Journal of Clinical Microbiology	34	12	3085	http://www.scopus.com/inward/record.url?eid=2-s2.0-0029956369&partnerID=40&md5=74bbda7a3dfb82518447e7e7c51fbdf2	8940452		Genotyping/classification	ACGCAGAAAGCGTCTAGCCATGGCGTTAGT	66	95	81	1.956	AAATGTCTCCCCCGCTGTAGCCAGCCGTGAACC	9250	9282	9267	1.59	9217
Ref312	Teramoto H., Shiogama K., Mizutani Y., Inada K.-I., Kamahora T., Makino M., Tsutsumi Y.	Molecular epidemiology of a hepatitis C virus outbreak in a leprosy sanatorium in Japan	2011	Journal of Clinical Microbiology	49	9	3358	http://www.scopus.com/inward/record.url?eid=2-s2.0-80052235353&partnerID=40&md5=65fd23c5078f31bc8ef8900c258c5cac		[Ref425], plus [Ref275]	Clustering/transmission	CACTGGGGAGTCCTGGCGGG	1395	1414	1405	1.7092	ATGTGCCAGCTGCCATTGGT	1587	1606	1597	1.3968	212
Ref312	Teramoto H., Shiogama K., Mizutani Y., Inada K.-I., Kamahora T., Makino M., Tsutsumi Y.	Molecular epidemiology of a hepatitis C virus outbreak in a leprosy sanatorium in Japan	2011	Journal of Clinical Microbiology	49	9	3358	http://www.scopus.com/inward/record.url?eid=2-s2.0-80052235353&partnerID=40&md5=65fd23c5078f31bc8ef8900c258c5cac		[Ref425], plus [Ref275]	Clustering/transmission	TATGAYACCCGCTGYTTTGACTC	8256	8278	8268	1.8172	GGCGGAATTCCTGGTCATAGCCTCCGTGAA	8616	8645	8631	1.5956	390
Ref313	Thelu M.-A., Drouet E., Hilleret M.-N., Zarski J.-P.	Lack of Clinical Significance of Variability in the Internal Ribosome Entry Site of Hepatitis C Virus	2004	Journal of Medical Virology	72	3	396	http://www.scopus.com/inward/record.url?eid=2-s2.0-1642539185&partnerID=40&md5=63f8d1815b13a26daeebf54e9a13e06e	14748063		Natural history	gacactccaccatgaatcac	21	40	31	1.8044	gtttttctttgaggtttagg	354	373	364	1.828	353
Ref314	Thelu M.A., Leroy V., Ramzan M., Dufeu-Duchesne T., Marche P., Zarski J.P.	IRES complexity before IFN-alpha treatment and evolution of the viral load at the early stage of treatment in peripheral blood mononuclear cells from chronic hepatitis C patients	2007	Journal of Medical Virology	79	3	242	http://www.scopus.com/inward/record.url?eid=2-s2.0-33846818622&partnerID=40&md5=eaf7462738d3aa75dc73e6f17744b4c0	17245718		Treatment response/resistance	gacactccaccatgaatcac	21	40	31	1.8044	gtttttctttgaggtttagg	354	373	364	1.828	353
Ref315	Timm J., Lauer G.M., Kavanagh D.G., Sheridan I., Kim A.Y., Lucas M., Pillay T., Ouchi K., Reyor L.L., Schulze Zur Wiesch J., Gandhi R.T., Chung R.T., Bhardwaj N., Klenerman P., Walker B.D., Allen T.M.	CD8 epitope escape and reversion in acute HCV infection	2004	Journal of Experimental Medicine	200	12	1593	http://www.scopus.com/inward/record.url?eid=2-s2.0-19944428565&partnerID=40&md5=000e75c688210fd6c25b235ef1a544c4	15611288		Natural history	GTAAGAGCACCAAGGTCCC	4045	4063	4055	1.7536	ACCCAGGTGCTCGTGACG	5306	5323	5315	1.7784	1279
Ref316	Toda T., Mitsui T., Tsukamoto Y., Ebara T., Hirose A., Masuko K., Nagashima S., Takahashi M., Okamoto H.	Molecular analysis of transmission of hepatitis C virus in a nurse who acquired acute hepatitis C after caring for a viremic patient with epistaxis	2009	Journal of Medical Virology	81	8	1363	http://www.scopus.com/inward/record.url?eid=2-s2.0-68049101296&partnerID=40&md5=55449d7e55dd80a3b5969e7ba6d80483	19551839	New PCR, plus [Ref424]	Clustering/transmission	TGGGACATGATGATGAACTG	1299	1318	1309	1.7116	ATGTGCCAACTGCCGTTGGT	1587	1606	1597	1.3968	308
Ref316	Toda T., Mitsui T., Tsukamoto Y., Ebara T., Hirose A., Masuko K., Nagashima S., Takahashi M., Okamoto H.	Molecular analysis of transmission of hepatitis C virus in a nurse who acquired acute hepatitis C after caring for a viremic patient with epistaxis	2009	Journal of Medical Virology	81	8	1363	http://www.scopus.com/inward/record.url?eid=2-s2.0-68049101296&partnerID=40&md5=55449d7e55dd80a3b5969e7ba6d80483	19551839	New PCR, plus [Ref424]	Clustering/transmission	GCTGTTTTGACTCAACGGTCAC	8266	8287	8277	1.8312	GAGTGGTTAGCTCCCCGT TCA	9375	9395	9386	1.6544	1130
Ref317	Tokita H., Kaufmann G.R., Matsubayashi M., Okuda I., Tanaka T., Harada H., Mukaide M., Suzuki K., Cooper D.A.	Hepatitis C virus core mutations reduce the sensitivity of a fluorescence enzyme immunoassay	2000	Journal of Clinical Microbiology	38	9	3450	http://www.scopus.com/inward/record.url?eid=2-s2.0-0033827764&partnerID=40&md5=b43ae1454c18f64a494073c16e1ab149	10970401	[Ref232]	evolution	AGACCGTGCACCATGAGCAC	330	349	340	1.8664	TACGCCGGGGGTCATTGGGGCCCCA	660	684	673	1.6404	355
Ref318	Tokita H., Okamoto H., Iizuka H., Kishimoto J., Tsuda F., Miyakawa Y., Mayumi M.	The entire nucleotide sequences of three hepatitis C virus isolates in genetic groups 7-9 and comparison with those in the other eight genetic groups	1998	Journal of General Virology	79	8	1847	http://www.scopus.com/inward/record.url?eid=2-s2.0-0031820951&partnerID=40&md5=596e3e576ef033c6590c924e2347e817	9714232		Genotyping/classification	1	1				X-tail		9612			9612
Ref319	Tokita H., Okamoto H., Lizuka H., Kishimoto J., Tsuda F., Lesmana L.A., Miyakawa Y., Mayumi M.	Hepatitis C virus variants from Jakarta, Indonesia classifiable into novel genotypes in the second (2e and 2f), tenth (10a) and eleventh (11a) genetic groups	1996	Journal of General Virology	77	2	293	http://www.scopus.com/inward/record.url?eid=2-s2.0-0030024940&partnerID=40&md5=aae0575fbdbc586deecec7ad4611bc36	8627233	[Ref237], [Ref321], and [Ref423]	Genotyping/classification		63						9447			9385
Ref320	Tokita H., Okamoto H., Luengrojanakul P., Vareesangthip K., Chainuvati T., Iizuka H., Tsuda F., Miyakawa Y., Mayumi M.	Hepatitis C virus variants from Thailand classifiable into five novel genotypes in the sixth (6b), seventh (7c, 7d) and ninth (9b, 9c) major genetic groups	1995	Journal of General Virology	76	9	2329	http://www.scopus.com/inward/record.url?eid=2-s2.0-0029155350&partnerID=40&md5=c75beeb859fe1d98ab144796ee9bde4c	7561773	[Ref237], [Ref321], and [Ref423]	Genotyping/classification		63						9447			9385
Ref321	Tokita H., Shrestha S.M., Okamoto H., Sakamoto M., Horikita M., Iizuka H., Shrestha S., Miyakawa Y., Mayumi M.	Hepatitis C virus variants from Nepal with novel genotypes and their classification into the third major group	1994	Journal of General Virology	75	4	931	http://www.scopus.com/inward/record.url?eid=2-s2.0-0028348301&partnerID=40&md5=f591de39be971b4cfa99a4bfe06ad6a6	8151307	[Ref407], [Ref234], [Ref237]	Genotyping/classification	TTCACGCAGAAAGCGTCTAG	63	82	73	1.9576	AGGTTCCCTGTTGCATAATT	828	847	838	1.452	785
Ref321	Tokita H., Shrestha S.M., Okamoto H., Sakamoto M., Horikita M., Iizuka H., Shrestha S., Miyakawa Y., Mayumi M.	Hepatitis C virus variants from Nepal with novel genotypes and their classification into the third major group	1994	Journal of General Virology	75	4	931	http://www.scopus.com/inward/record.url?eid=2-s2.0-0028348301&partnerID=40&md5=f591de39be971b4cfa99a4bfe06ad6a6	8151307	[Ref407], [Ref234], [Ref237]	Epidemiology	GCCGATCTCATGGGGTACAT	732	751	742	1.5604	ATGTGCCACGAGCCATTGGT	1587	1606	1597	1.3968	875
Ref321	Tokita H., Shrestha S.M., Okamoto H., Sakamoto M., Horikita M., Iizuka H., Shrestha S., Miyakawa Y., Mayumi M.	Hepatitis C virus variants from Nepal with novel genotypes and their classification into the third major group	1994	Journal of General Virology	75	4	931	http://www.scopus.com/inward/record.url?eid=2-s2.0-0028348301&partnerID=40&md5=f591de39be971b4cfa99a4bfe06ad6a6	8151307	[Ref407], [Ref234], [Ref237]	Epidemiology	GACACCCGCTGTTTTGACTC	8259	8278	8269	1.8316			9447			1189
Ref322	Tong X., Guo Z., Wright-Minogue J., Xia E., Prongay A., Madison V., Qiu P., Venkatraman S., Velazquez F., Njoroge F.G., Malcolm B.A.	Impact of naturally occurring variants of HCV protease on the binding of different classes of protease inhibitors	2006	Biochemistry	45	5	1353	/pubmed/10675414	16445277	[Ref413]	Treatment response/resistance	TCATCACCTGGGGTGCGGAT	3289	3308	3299	1.7248	GTGCTCTTACCGCTGCCGGT	4035	4054	4045	1.7624	766
Ref323	Toniutto P., Pirisi M., Tisminetzky S.G., Fabris C., Chinellato E., Gerotto M., Falleti E., Ferroni P., Lombardelli T., Bartoli E., Baralle F.	Discordant results from hepatitis C virus genotyping by procedures based on amplification of different genomic regions	1996	Journal of Clinical Microbiology	34	10	2382	http://www.scopus.com/inward/record.url?eid=2-s2.0-9544248646&partnerID=40&md5=ed03b4f16c53bb07784ed9d7d7a025d9	8880484	[Ref422]	Genotyping/classification	GTGCAGCCTCCAGGACCC	105	122	114	1.908	CCGTGAGCGTTCGTGGGATA	321	340	331	1.916	236
Ref324	Torres-Puente M., Cuevas J.M., Jimenez-Hernandez N., Bracho M.A., Garcia-Robles I., Carnicer F., del Olmo J., Ortega E., Moya A., Gonzalez-Candelas F.	Contribution of insertions and deletions to the variability of hepatitis C virus populations	2007	Journal of General Virology	88	8	2198	http://www.scopus.com/inward/record.url?eid=2-s2.0-34547591765&partnerID=40&md5=bde6026a2491efbb473288088a11f823	17622623	[Ref137]	evolution	GGRATATGATGATGAACTGGTC	1300	1321	1311	1.694	GGAGTGAAGCARTATACTGG	1854	1873	1864	1.5528	574
Ref324	Torres-Puente M., Cuevas J.M., Jimenez-Hernandez N., Bracho M.A., Garcia-Robles I., Carnicer F., del Olmo J., Ortega E., Moya A., Gonzalez-Candelas F.	Contribution of insertions and deletions to the variability of hepatitis C virus populations	2007	Journal of General Virology	88	8	2198	http://www.scopus.com/inward/record.url?eid=2-s2.0-34547591765&partnerID=40&md5=bde6026a2491efbb473288088a11f823	17622623	[Ref137]	evolution	TAGGTWYGCSCCCCCYTGCA	6734	6753	6744	1.554	CCCTCSAGRGGGGGCAT	7503	7519	7512	1.2296	786
Ref325	Torres-Puente M., Cuevas J.M., Jimenez-Hernandez N., Bracho M.A., Garcia-Robles I., Wrobel B., Carnicer F., Del Olmo J., Ortega E., Moya A., Gonzalez-Candelas F.	Genetic variability in hepatitis C virus and its role in antiviral treatment response	2008	Journal of Viral Hepatitis	15	3	188	http://www.scopus.com/inward/record.url?eid=2-s2.0-38549128753&partnerID=40&md5=f817ee6ec94ddd09b536fa3e9cd7e6e7	18233992	[Ref137]	Treatment response/resistance	GGRATATGATGATGAACTGGTC	1300	1321	1311	1.694	GGAGTGAAGCARTATACTGG	1854	1873	1864	1.5528	574
Ref325	Torres-Puente M., Cuevas J.M., Jimenez-Hernandez N., Bracho M.A., Garcia-Robles I., Wrobel B., Carnicer F., Del Olmo J., Ortega E., Moya A., Gonzalez-Candelas F.	Genetic variability in hepatitis C virus and its role in antiviral treatment response	2008	Journal of Viral Hepatitis	15	3	188	http://www.scopus.com/inward/record.url?eid=2-s2.0-38549128753&partnerID=40&md5=f817ee6ec94ddd09b536fa3e9cd7e6e7	18233992	[Ref137]	Treatment response/resistance	TAGGTWYGCSCCCCCYTGCA	6734	6753	6744	1.554	CCCTCSAGRGGGGGCAT	7503	7519	7512	1.2296	786
Ref326	Toyoda H., Fukuda Y., Hayakawa T., Kumada T., Nakano S., Takamatsu J., Saito H.	Diversity of nucleotide sequences in hypervariable region 1 of hepatitis C virus in Japanese patients with chronic hepatitis C of unknown mode of transmission	1999	Digestive Diseases and Sciences	44	10	1944	http://www.scopus.com/inward/record.url?eid=2-s2.0-0032710536&partnerID=40&md5=6f139cabfec377b2e3a5c7cb285e2b99	10548340		evolution	TACTACTCCATGGTGGGAGACTGGGC	1422	1447	1435	1.7724	GATGTGCCAGCTGCCATTGG	1588	1607	1598	1.4164	186
Ref327	Toyoda H., Fukuda Y., Koyama Y., Nakano I., Kinoshita M., Hadama T., Takamatsu J., Hayakawa T.	Nucleotide sequence diversity of hypervariable region 1 of hepatitis C virus in Japanese hemophiliacs with chronic hepatitis C and patients with chronic posttransfusion hepatitis C	1996	Blood	88	4	1488	http://www.scopus.com/inward/record.url?eid=2-s2.0-0029794022&partnerID=40&md5=ef7c2219f666b36f4369a3bfef9590f9	8695870		evolution	TACTACTCCATGGTGGGAGACTGGGC	1422	1447	1435	1.7724	GATGTGCCAGCTGCCATTGG	1588	1607	1598	1.4164	186
Ref328	Trowbridge R., Gowans E.J.	Molecular cloning of an Australian isolate of hepatitis C virus	1998	Archives of Virology	143	3	501	http://www.scopus.com/inward/record.url?eid=2-s2.0-0031982127&partnerID=40&md5=e25f5a95a1facac4d66ff6020f4baab4	9572551		Genotyping/classification	GGCGACACTCCACCATAGAT	18	37	28	1.7928	GTCCTTACTGCCCAGTTGAA	9177	9196	9187	1.6816	9179
Ref329	Trowridge R., Gowans E.J.	Identification of novel sequences at the 5â€² terminus of the hepatitis C virus genome	1998	Journal of Viral Hepatitis	5	2	95	http://www.scopus.com/inward/record.url?eid=2-s2.0-0031826926&partnerID=40&md5=21fa31e7e89a69475c1f92f7e7c307ec	9572033		Genotyping/classification	5'Race	1				GTTTATCCAAGAAAGGAC	190	207	199	1.87	207
Ref333	Tsuboi S., Nagamori S., Miyazaki M., Mihara K., Fukaya K., Teruya K., Kosaka T., Tsuji T., Namba M.	Persistence of hepatitis C virus RNA in established human hepatocellular carcinoma cell lines	1996	Journal of Medical Virology	48	2	133	http://www.scopus.com/inward/record.url?eid=2-s2.0-0030041322&partnerID=40&md5=38bb685e2633e9f453c110eacdd0a348	8835345	[Ref407]	Natural history	TTCACGCAGAAAGCGTCTAG	63	82	73	1.9576	GTTGATCCAAGAAAGGACCC	188	207	198	1.8708	145
Ref334	Tsukiyama-Kohara K., Yamaguchi K., Maki N., Ohta Y., Miki K., Mizokami M., Ohba K.-I., Tanaka S., Hattori N., Nomoto A., Kohara M.	Antigenicities of group I and II hepatitis C virus polypeptides - Molecular basis of diagnosis	1993	Virology	192	2	430	http://www.scopus.com/inward/record.url?eid=2-s2.0-0027317727&partnerID=40&md5=93af8d7c38a0c1c894d1b10ef6252f3f	7678473	[Ref158]	evolution	TGATAGGGTGCTTGCGAGTG	294	313	304	1.9296	TGCGCCAGGGCCCTGGCAGC	780	799	790	1.282	506
Ref334	Tsukiyama-Kohara K., Yamaguchi K., Maki N., Ohta Y., Miki K., Mizokami M., Ohba K.-I., Tanaka S., Hattori N., Nomoto A., Kohara M.	Antigenicities of group I and II hepatitis C virus polypeptides - Molecular basis of diagnosis	1993	Virology	192	2	430	http://www.scopus.com/inward/record.url?eid=2-s2.0-0027317727&partnerID=40&md5=93af8d7c38a0c1c894d1b10ef6252f3f	7678473	[Ref158]	evolution	CTGGGAGAGCGTCTTCACAG-	5012	5031	5022	1.75	CACATTTGATCCCACGATGG	5145	5164	5155	1.75	153
Ref335	Tuveri R., Rothschild C., Pol S., Reijasse D., Persico T., Gazengel C., Brechot C., Thiers V.	Hepatitis C virus genotypes in French haemophiliacs: Kinetics and reappraisal of mixed infections	1997	Journal of Medical Virology	51	1	36	http://www.scopus.com/inward/record.url?eid=2-s2.0-0031017805&partnerID=40&md5=e3b0ce94d3a16189c5282c5bb894781f	8986947	[Ref421] and [Ref99]	Genotyping/classification	GAGGTCTCGTAGACCGTGCA	320	339	330	1.9184	GGATAGGTTGTCGCCTTCCA	518	537	528	1.8992	218
Ref336	Ukai K., Ishigami M., Yoshioka K., Kawabe N., Katano Y., Hayashi K., Honda T., Yano M., Goto H.	Mutations in carboxy-terminal part of E2 including PKR/eIF2Î± phosphorylation homology domain and interferon sensitivity determining region of nonstructural 5A of hepatitis C virus 1b: Their correlation with response to interferon monotherapy and viral load	2006	World Journal of Gastroenterology	12	23	3722	http://www.scopus.com/inward/record.url?eid=2-s2.0-33745451836&partnerID=40&md5=997650126ec56a83dd83317b417a61a9	16773689		Treatment response/resistance	GACTACCCATACAGGCTC	2169	2186	2178	1.388	TTCCTTCTTCTGGCGGA	2508	2525	2517	1.678	357
Ref336	Ukai K., Ishigami M., Yoshioka K., Kawabe N., Katano Y., Hayashi K., Honda T., Yano M., Goto H.	Mutations in carboxy-terminal part of E2 including PKR/eIF2Î± phosphorylation homology domain and interferon sensitivity determining region of nonstructural 5A of hepatitis C virus 1b: Their correlation with response to interferon monotherapy and viral load	2006	World Journal of Gastroenterology	12	23	3722	http://www.scopus.com/inward/record.url?eid=2-s2.0-33745451836&partnerID=40&md5=997650126ec56a83dd83317b417a61a9	16773689		Treatment response/resistance	CAAGCGTAGGCTGGCCAGGG	6899	6918	6909	1.6308	GTTTTCGCAGGATCTCCGCCG	7153	7173	7164	1.824	275
Ref337	Umlauft F, Wong DT, Oefner PJ, Underhill PA, Cheung RC, Wright TL, Kolykhalov AA, Gruenewald K, Greenberg HB.	Hepatitis C virus detection by single-round PCR specific for the terminal 3' noncoding region.	1996	J Clin Microbiol	34	10	2552	/pubmed/8880519	8880519		Genotyping/classification	CGGTGCCTCCATCTTAGCCCTAG	9548	9570	9560	0	TCCAGAGAGGCCAGTATCAGCAC	9616	9638	9628	0	91
Ref338	Urbani S., Amadei B., Cariani E., Fisicaro P., Orlandini A., Missale G., Ferrari C.	The impairment of CD8 responses limits the selection of escape mutations in acute hepatitis C virus infection	2005	Journal of Immunology	175	11	7519	http://www.scopus.com/inward/record.url?eid=2-s2.0-28244493685&partnerID=40&md5=b00af8eed2fceed895db89dc5f2d0b66	16301660		evolution	AGCCTCACAGGCCGGGACAA	3477	3496	3487	1.796	TCCGAGCTGCCGCAGGTGCA	3708	3727	3718	1.8584	251
Ref339	Utama A., Tania N.P., Dhenni R., Gani R.A., Hasan I., Sanityoso A., Lelosutan S.A.R., Martamala R., Lesmana L.A., Sulaiman A., Tai S.	Genotype diversity of hepatitis C virus (HCV) in HCV-associated liver disease patients in Indonesia	2010	Liver International	30	8	1152	http://www.scopus.com/inward/record.url?eid=2-s2.0-79951657218&partnerID=40&md5=04b9f7b693d7dce6b1c48e708be6ed13	20492518		Genotyping/classification	TCTAGCCATGGCGTTAGTAYGAGTGT	78	103	91	1.9452	ATGTACCCCATGAGGTCGGC	732	751	742	1.5604	674
Ref340	Van Doorn L.J., Kleter G.E.M., Stuyver L., Maertens G., Brouwer J.T., Schalm S.W., Heijtink R.A., Quint W.G.V.	Sequence analysis of hepatitis C virus genotypes 1 to 5 reveals multiple novel subtypes in the Benelux countries	1995	Journal of General Virology	76	7	1871	http://www.scopus.com/inward/record.url?eid=2-s2.0-0029022689&partnerID=40&md5=c03e4be565a7633fa12ada7c4ae7b73c	9049395		Epidemiology	CCAACCATARRATCACTCCCCTGTGAGG	26	52	40	1.8436	AAGCACCCTATCAGGCAGTACCACAAGGC	278	306	293	1.9572	281
Ref340	Van Doorn L.J., Kleter G.E.M., Stuyver L., Maertens G., Brouwer J.T., Schalm S.W., Heijtink R.A., Quint W.G.V.	Sequence analysis of hepatitis C virus genotypes 1 to 5 reveals multiple novel subtypes in the Benelux countries	1995	Journal of General Virology	76	7	1871	http://www.scopus.com/inward/record.url?eid=2-s2.0-0029022689&partnerID=40&md5=c03e4be565a7633fa12ada7c4ae7b73c	9049395		Epidemiology	GGTACTGCCTGATAGGGTGCTTGC	285	308	297	1.9668	ATiTACCCCATGAGiTCGGC	732	751	742	1.5604	467
Ref340	Van Doorn L.J., Kleter G.E.M., Stuyver L., Maertens G., Brouwer J.T., Schalm S.W., Heijtink R.A., Quint W.G.V.	Sequence analysis of hepatitis C virus genotypes 1 to 5 reveals multiple novel subtypes in the Benelux countries	1995	Journal of General Virology	76	7	1871	http://www.scopus.com/inward/record.url?eid=2-s2.0-0029022689&partnerID=40&md5=c03e4be565a7633fa12ada7c4ae7b73c	9049395		Epidemiology	GCCGACCTCATGGGGTACAT	732	751	742	1.5604	GGiGACCAGTTCATCATCAT	1305	1323	1315	1.7488	592
Ref342	Vargas H.E., Wang L.-F., Laskus T., Poutous A., Lee R., Demetris A., Dodson F., Casavilla A., Fung J., Gayowski T., Singh N., Marino I., Rakela J.	Distribution of infecting hepatitis C virus genotypes in end-stage liver disease patients at a large American Transplantation Center	1997	Journal of Infectious Diseases	175	2	448	http://www.scopus.com/inward/record.url?eid=2-s2.0-0031036401&partnerID=40&md5=641924771772cbc289e34d26e1f546ae	9203670	new PCR, plus [Ref395]	Epidemiology	TAGATTGGGTGTGCGCGCGA	467	486	477	1.92208	AGGTTCCCTGTTGCATAATT	828	847	838	1.452	381
Ref342	Vargas H.E., Wang L.-F., Laskus T., Poutous A., Lee R., Demetris A., Dodson F., Casavilla A., Fung J., Gayowski T., Singh N., Marino I., Rakela J.	Distribution of infecting hepatitis C virus genotypes in end-stage liver disease patients at a large American Transplantation Center	1997	Journal of Infectious Diseases	175	2	448	http://www.scopus.com/inward/record.url?eid=2-s2.0-0031036401&partnerID=40&md5=641924771772cbc289e34d26e1f546ae	9203670	new PCR, plus [Ref395]	Epidemiology	TGGGGATCCCGTATGATACCCGCTGCTTTGA	8245	8275	8261	1.7908	GGCGGAATTCCTGGTCATAGCCTCCGTGAA	8616	8645	8631	1.5956	401
Ref343	Vatteroni M., Maggi F., Morrica A., Fornai C., Giorgi M., Pistello M., Bendinelli M.	Comparative evaluation of five rapid methods for identifying subtype 1b and 2c hepatitis C virus isolates	1997	Journal of Virological Methods	66	2	187	http://www.scopus.com/inward/record.url?eid=2-s2.0-0030802096&partnerID=40&md5=e52c3d26ffb130f1d91980954c259883	9255729	[Ref420]	Genotyping/classification	TAGATTGGGTGTGCGCGCGA	467	486	477	1.92208	AGGTTCCCTGTTGCATAATT	828	847	838	1.452	381
Ref343	Vatteroni M., Maggi F., Morrica A., Fornai C., Giorgi M., Pistello M., Bendinelli M.	Comparative evaluation of five rapid methods for identifying subtype 1b and 2c hepatitis C virus isolates	1997	Journal of Virological Methods	66	2	187	http://www.scopus.com/inward/record.url?eid=2-s2.0-0030802096&partnerID=40&md5=e52c3d26ffb130f1d91980954c259883	9255729	[Ref420]	Genotyping/classification	TGGGGATCCCGTATGATACCCGCTGCTTTGA	8245	8275	8261	1.7908	GGCGGAATTCCTGGTCATAGCCTCCGTGAA	8616	8645	8631	1.5956	401
Ref344	Viazov S., Kuzin S., Paladi N., Tchernovetsky M., Isaeva E., Mazhul L., Vasychova F., Widell A., Roggendorf M.	Hepatitis c virus genotypes in different regions of the former soviet union (Russia, Belarus, Moldova, and Uzbekistan)	1997	Journal of Medical Virology	53	1	36	http://www.scopus.com/inward/record.url?eid=2-s2.0-0030827758&partnerID=40&md5=841ca0f204ae95039440ee8ae64ef330	9298730	[Ref355]	Natural history	TAGATTGGGTGTGCGCGCGA	467	486	477	1.92208	AGGTTCCCTGTTGCATAATT	828	847	838	1.452	381
Ref345	Viazov S., Ross S.S., Kyuregyan K.K., Timm J., Neumann-Haefelin C., Isaeva O.V., Popova O.E., Dmitriev P.N., Sharkawi F.E., Thimme R., Michailov M.I., Roggendorf M.	Hepatitis C virus recombinants are rare even among intravenous drug users	2010	Journal of Medical Virology	82	2	232	http://www.scopus.com/inward/record.url?eid=2-s2.0-74549162118&partnerID=40&md5=424f678c19e643687914d48737223898	20029799	[Ref355]	Natural history	TAGATTGGGTGTGCGCGCGA	467	486	477	1.92208	AGGTTCCCTGTTGCATAATT	828	847	838	1.452	381
Ref345	Viazov S., Ross S.S., Kyuregyan K.K., Timm J., Neumann-Haefelin C., Isaeva O.V., Popova O.E., Dmitriev P.N., Sharkawi F.E., Thimme R., Michailov M.I., Roggendorf M.	Hepatitis C virus recombinants are rare even among intravenous drug users	2010	Journal of Medical Virology	82	2	232	http://www.scopus.com/inward/record.url?eid=2-s2.0-74549162118&partnerID=40&md5=424f678c19e643687914d48737223898	20029799	[Ref355]	Natural history	CATATGACACCCGCTGYTTYGACTC	8254	8278	8267	1.8292	GGAGGGGCGGAATACCTGGTCATRGCYTCCGTRAA	8616	8650	8634	1.5648	397
Ref346	Viazov S., Widell A., Nordenfelt E.	Mixed infection with two types of hepatitis C virus is probably a rare event	2000	Infection	28	1	21	http://www.scopus.com/inward/record.url?eid=2-s2.0-0033950033&partnerID=40&md5=cdfb7e68cebddca24a47840bbe50203f	10697786	[Ref418]	Genotyping/classification	CTCAAGGGTATAAGGTGCTCGTACT	4078	4102	4091	1.7804	CTATAGTTGGTATGACGGACACATC	4605	4629	4618	1.5612	552
Ref346	Viazov S., Widell A., Nordenfelt E.	Mixed infection with two types of hepatitis C virus is probably a rare event	2000	Infection	28	1	21	http://www.scopus.com/inward/record.url?eid=2-s2.0-0033950033&partnerID=40&md5=cdfb7e68cebddca24a47840bbe50203f	10697786	[Ref418]	Genotyping/classification	TGGGGATCCCGTATGATACCCGCTGCTTTGA	8245	8275	8261	1.7908	GGCGGAATTCCTGGTCATAGCCTCCGTGAA	8616	8645	8631	1.5956	401
Ref349	Watanabe H., Enomoto N., Nagayama K., Izumi N., Marumo F., Sato C., Watanabe M.	Number and position of mutations in the interferon (IFN) sensitivity-determining region of the gene for nonstructural protein 5A correlate with IFN efficacy in hepatitis C virus genotype 1b infection	2001	Journal of Infectious Diseases	183	8	1195	http://www.scopus.com/inward/record.url?eid=2-s2.0-0035871664&partnerID=40&md5=207c783a7c2e4ac7d8cfd87497212787	11262201		Treatment response/resistance	CAGGTACGCTCCGGCGTGCA	4948	4968	4959	1.7124	GGGGCCTTGGTAGGTGGCAA	7287	7305	7297	1.754	2358
Ref350	Watanabe H., Nagayama K., Enomoto N., Itakura J., Tanabe Y., Hamano K., Izumi N., Sato C., Watanabe M.	Sequence elements correlating with circulating viral load in genotype 1b hepatitis C virus infection	2003	Virology	311	2	376	http://www.scopus.com/inward/record.url?eid=2-s2.0-0038045756&partnerID=40&md5=d1add271cb62c5deca6658c601104249	12842626	[Ref077]	Treatment response/resistance	5'Race	1						9421			9421
Ref351	Watanabe K., Yoshioka K., Yano M., Ishigani M., Ukai K., Ito H., Miyata F., Mizutani T., Goto H.	Mutations in the nonstructural region 5B of hepatitis C virus genotype 1b: Their relation to viral load, response to interferon, and the nonstructural region 5A	2005	Journal of Medical Virology	75	4	504	http://www.scopus.com/inward/record.url?eid=2-s2.0-14344260444&partnerID=40&md5=dbdd130a5dfa84864fe603db6b2d7f44	15714488		Treatment response/resistance	GGTGAGGACGTCGTCT	7578	7596	7588	1.728	TGGAGTGGTTAGCTCCCGT	9375	9394	9385	1.642	1817
Ref352	Wei L., Wang Y., Du S., Wang H., Tao Q.	Genetic variability and characterization of non-structural region 5 of hepatitis C virus genome from Chinese patients	1998	Journal of Gastroenterology	33	1	62	http://www.scopus.com/inward/record.url?eid=2-s2.0-0031936859&partnerID=40&md5=ef710c8a61a2146ca207b913510edc3c	9497224		evolution	GCTGAATTCGACACCCGCTGTTTTG	8251	8274	8263	1.832	CAGAAGCTTTAGTCATAGCCTCCGTG	8618	8643	8631	1.5956	393
Ref353	Weiner A., Erickson A.L., Kansopon J., Crawford K., Muchmore E., Hughes A.L., Houghton M., Walker C.M.	Persistent hepatitis C virus infection in a chimpanzee is associated with emergence of a cytotoxic T lymphocyte escape variant	1995	Proceedings of the National Academy of Sciences of the United States of America	92	7	2755	http://www.scopus.com/inward/record.url?eid=2-s2.0-0028968636&partnerID=40&md5=3e4bcbf60de48e984634c80ea372847c	7708719		evolution	GGGAGACATCTCATCTTCTG	4503	4522	4513	1.688	CTGGGGGAGCGTGATTGTCTCAAT	4755	4778	4767	1.6072	276
Ref354	Widell A., Christensson B., Wiebe T., Schalen C., Hansson H.B., Allander T., Persson M.A.A.	Epidemiologic and molecular investigation of outbreaks of hepatitis C virus infection on a pediatric oncology service	1999	Annals of Internal Medicine	130	2	130	http://www.scopus.com/inward/record.url?eid=2-s2.0-0033582180&partnerID=40&md5=ac119de00452ed0b1a66f05666895f80	10068359	[Ref010]	Clustering/transmission	GGGACATGATGATCAACTGG	1300	1319	1310	1.7108	GBGAAGGAATTCACTGGGCCACA	1848	1870	1860	1.5648	571
Ref355	Widell A., Shev S., Mansson S., Zhang Y.-Y., Foberg U., Norkrans G., Fryden A., Weiland O., Kurkus J., Nordenfelt E.	Genotyping of hepatitis C virus isolates by a modified polymerase chain reaction assay using type specific primers: Epidemiological applications	1994	Journal of Medical Virology	44	3	272	http://www.scopus.com/inward/record.url?eid=2-s2.0-0028148310&partnerID=40&md5=f7d4ca1adac6c00b038431936eb209fe	7531757	Based on [Ref236]	Genotyping/classification	TAGATTGGGTGTGCGCGCGA	467	486	477	1.92208	AGGTTCCCTGTTGCATAATT	828	847	838	1.452	381
Ref356	Widell A., Zhang Y.-Y., Andersson-Gare B., Hammarstrom L.	At least three hepatitis C virus strains implicated in Swedish and Danish patients with intravenous immunoglobulin-associated hepatitis C	1997	Transfusion	37	3	313	http://www.scopus.com/inward/record.url?eid=2-s2.0-0030938935&partnerID=40&md5=3f2ee1c3f9bbd3f9b0ca9b1cd88051ca	9122906	[Ref355] and [Ref10]	Genotyping/classification	TAGATTGGGTGTGCGCGCGA	467	486	477	1.92208	AGGTTCCCTGTTGCATAATT	828	847	838	1.452	381
Ref356	Widell A., Zhang Y.-Y., Andersson-Gare B., Hammarstrom L.	At least three hepatitis C virus strains implicated in Swedish and Danish patients with intravenous immunoglobulin-associated hepatitis C	1997	Transfusion	37	3	313	http://www.scopus.com/inward/record.url?eid=2-s2.0-0030938935&partnerID=40&md5=3f2ee1c3f9bbd3f9b0ca9b1cd88051ca	9122906	[Ref355] and [Ref10]	Clustering/transmission	GGGACATGATGATCAACTGG	1300	1319	1310	1.7108	GBGAAGGAATTCACTGGGCCACA	1848	1870	1860	1.5648	571
Ref357	Wu R.-R., Mizokami M., Lau J.Y.N., Ohno T., Fang Z.-X., Ohba K.-I., Wu X.-S., Hata A., Sasaki M., Iino S.	Seroprevalence of hepatitis C virus infection and its genotype in Lanzhou, western China	1995	Journal of Medical Virology	45	2	174	http://www.scopus.com/inward/record.url?eid=2-s2.0-0028927552&partnerID=40&md5=7a76906205d9ed976244e7bf396e2121	7775935	[Ref236]	Genotyping/classification	TAGATTGGGTGTGCGCGCGA	467	486	477	1.92208	AGGTTCCCTGTTGCATAATT	828	847	838	1.452	381
Ref358	Xu L.-Z., Larzul D., Delaporte E., Brechot C., Kremsdorf D.	Hepatitis C virus genotype 4 is highly prevalent in central Africa (Gabon)	1994	Journal of General Virology	75	9	2393	http://www.scopus.com/inward/record.url?eid=2-s2.0-0028132879&partnerID=40&md5=78ee551708b5b0c62e8e02e1f534e009	8077938	[Ref417]	Genotyping/classification	CTGAGATCTGGTCTGCGGAACCGGTGAGT	139	164	152	1.9552	GCTAGATCTTCCCTGTTGCATAGTTCACGCCG	821	854	838	1.452	716
Ref359	Xu X, Chen H, Cao X, Ben K.	Efficient infection of tree shrew (Tupaia belangeri) with hepatitis C virus grown in cell culture or from patient plasma.	2007	J Gen Virol	88	9	2504	/pubmed/17698660	17698660	[Ref167]	Genotyping/classification	CATAGATCACTCCCCTGTGAGGAACT	31	56	44	1.8644	CTGTGGGCGGCGGTTGGTGTT	381	401	392	1.9548	371
Ref359	Xu X, Chen H, Cao X, Ben K.	Efficient infection of tree shrew (Tupaia belangeri) with hepatitis C virus grown in cell culture or from patient plasma.	2007	J Gen Virol	88	9	2504	/pubmed/17698660	17698660	[Ref167]	Genotyping/classification	TATGAYACCCGCTGYTTTGACTC	8256	8278	8268	1.8172	GCNGARTAYCTVGTCATAGCCTC	8622	8644	8634	1.5648	389
Ref360	Xu Z., Fan X., Xu Y., Di Bisceglie A.M.	Comparative analysis of nearly full-length hepatitis C virus quasispecies from patients experiencing viral breakthrough during antiviral therapy: Clustered mutations in three functional genes, E2, NS2, and NS5a	2008	Journal of Virology	82	19	9417	http://www.scopus.com/inward/record.url?eid=2-s2.0-52649090810&partnerID=40&md5=6e2a0f11aa8442537e297127c76ece1f	18667493	[Ref085]	Treatment response/resistance	CATAGTGGTCTGCGGAACCGGT	139	160	150	1.9548	atggcagccctacctcctctgg	9139	9160	9150	1.76	9022
Ref360	Xu Z., Fan X., Xu Y., Di Bisceglie A.M.	Comparative analysis of nearly full-length hepatitis C virus quasispecies from patients experiencing viral breakthrough during antiviral therapy: Clustered mutations in three functional genes, E2, NS2, and NS5a	2008	Journal of Virology	82	19	9417	http://www.scopus.com/inward/record.url?eid=2-s2.0-52649090810&partnerID=40&md5=6e2a0f11aa8442537e297127c76ece1f	18667493	[Ref085]	Treatment response/resistance	GTACTGAATTCGGTACCGGTTGCTCTTTCTCTATCTTCC	835	873	855	1.396	ACTCGAAGCTTAGATCTTTGATGGTACAAGGRTAATGCC	2188	2227	2208	1.4152	1393
Ref361	Yamamoto C., Enomoto N., Kurosaki M., Yu S.H., Tazawa J., Izumi N., Marumo F., Sato C.	Nucleotide sequence variations in the internal ribosome entry site of hepatitis C virus-1b: No association with efficacy of interferon therapy or serum HCV-RNA levels	1997	Hepatology	26	6	1616	http://www.scopus.com/inward/record.url?eid=2-s2.0-0030663221&partnerID=40&md5=2e8631d54fa4f4cd0f323c8a27e5bc75	9398006	[Ref402]	Treatment response/resistance	TGTAAAACGACGGCCAGTGCCCCC	1	12			GCGGTTGGTGTTACGTTTGG	373	392	383	1.9372	392
Ref362	Yanagi M., Purcell R.H., Emerson S.U., Bukh J.	Transcripts from a single full-length cDNA clone of hepatitis C virus are infectious when directly transfected into the liver of a chimpanzee	1997	Proceedings of the National Academy of Sciences of the United States of America	94	16	8738	http://www.scopus.com/inward/record.url?eid=2-s2.0-0030740520&partnerID=40&md5=87cf574bc164b11b827d7982eb156bfb	9238047		Natural history	ACTGTCTTCACGCAGAAAGCGTCTAGCCAT	156	186	172	1.964	CGTCTCTAGAGGACCTTTCACAGCTAGCCGTGACTAGGG	9565	9601	9584		9446
Ref362	Yanagi M., Purcell R.H., Emerson S.U., Bukh J.	Transcripts from a single full-length cDNA clone of hepatitis C virus are infectious when directly transfected into the liver of a chimpanzee	1997	Proceedings of the National Academy of Sciences of the United States of America	94	16	8738	http://www.scopus.com/inward/record.url?eid=2-s2.0-0030740520&partnerID=40&md5=87cf574bc164b11b827d7982eb156bfb	9238047		Natural history	GTCCAAGCTTATCACAGCGTGTCTCATGCCCGGCCCCG	9273	9310	9292	1.68	CGTCTCTAGACATGATCTGCAGAGAGGCCAGTATCAGCACTCTCTGC	9609	9646	9628		374
Ref363	Yanagi M., Purcell R.H., Emerson S.U., Bukh J.	Hepatitis C virus : An infectious molecular clone of a second major genotype (2a) and lack of viability of intertypic la and 2a chimeras	1999	Virology	262	1	250	http://www.scopus.com/inward/record.url?eid=2-s2.0-0033568548&partnerID=40&md5=09f75fa903d24a5b3f3121c9b415de22	10489358		Natural history		17				CATGATCTGCAGAGAGACCAGTTACGGCACTCTCTGCAGTCATGCGGCTCACGGACCTTTCACAGCTAGCCGTGACTAGGGCTAAGATGGAGCCACC	9549	9645	9598		9629
Ref364	Yanagi M., St. Claire M., Shapiro M., Emerson S.U., Purcell R.H., Bukh J.	Transcripts of a chimeric CDNA clone of hepatitis C virus genotype 1b are infectious in vivo	1998	Virology	244	1	161	http://www.scopus.com/inward/record.url?eid=2-s2.0-17544390782&partnerID=40&md5=627e01c0d225a653d205dcf64856d0a7	9581788		Natural history	ACTGTCTTCACGCAGAAAGCGTCTAGCCAT	156	186	172	1.964		9375	9401	9389	1.6172	9246
Ref365	Yang J., Fang M.-x., Li J., Lou G.-q., Lu H.-j., Wu N.-p.	Detection of hepatitis C virus by an improved loop-mediated isothermal amplification assay	2011	Archives of Virology	156	8	1387	http://www.scopus.com/inward/record.url?eid=2-s2.0-79960894204&partnerID=40&md5=980375e8729af45872d5ccb9c26eed32	21562883	[Ref401]	Genotyping/classification	TTCTCRTATGAYACCCGCTGYTTTGA	8250	8275	8263	1.832	TACCTVGTCATAGCCTCCGTGAA	8616	8638	8628	1.5672	389
Ref366	Yao E, Tavis JE; Virahep-C Study Group.	A general method for nested RT-PCR amplification and sequencing the complete HCV genotype 1 open reading frame.	2005	Virol J	1	2	88	/pubmed/16321149	16321149		evolution	TGGCGTTAGTATGAGTG	86	102	95	1.9416	AGGAGTAGGCARAACCAG	9137	9334	9236	1.792	9249
Ref367	Yeh B.-I., Han K.-H., Lee H.-W., Sohn J.H., Ryu W.-S., Yoon D.-J., Yoon J., Kim H.-W., Kong I.D., Chang S.J., Choi J.-W.	Factors predictive of response to interferon-Î± therapy in hepatitis C virus type 1b infection	2002	Journal of Medical Virology	66	4	481	http://www.scopus.com/inward/record.url?eid=2-s2.0-0036198187&partnerID=40&md5=22d30f4442d90c9cb5d68d0720724fcf	11857525		Treatment response/resistance	ATGGCTTGGGATATGATGATGAAC	1293	1316	1305	1.71	AAGCAGTCGACTGGACCACACAC	1845	1867	1857	1.5688	575
Ref368	Yeh B.-I., Han K.-H., Oh S.-H., Kim H.-S., Hong S.-H., Oh S.-H., Kim Y.-S.	Nucleotide sequence variation in the hypervariable region of the hepatitis C virus in the sera of chronic hepatitis C patients undergoing controlled interferon-Î± therapy	1996	Journal of Medical Virology	49	2	95	http://www.scopus.com/inward/record.url?eid=2-s2.0-0029989728&partnerID=40&md5=a720f8d119041bf4cafbdc03a0fc0271	8991943		Treatment response/resistance	ATGGCTTGGGATATGATGATGAAC	1293	1316	1305	1.71	AAGCAGTCGACTGGACCACACAC	1845	1867	1857	1.5688	575
Ref369	Yeh B.-I., Kim H.-W., Kim H.-S., Lee J.Y., Lee K.H., Lee K.M., Kim J.S., Han K.-H.	The prediction of interferon-Î± therapeutic effect by sequence variation of the HCV hypervariable region 1	1999	Yonsei Medical Journal	40	5	430	http://www.scopus.com/inward/record.url?eid=2-s2.0-0032717462&partnerID=40&md5=3214e28ebe0d43559b9601b4aade7b1a	10565252		Treatment response/resistance	ATGGCTTGGGATATGATGATGAAC	1293	1316	1305	1.71	AAGCAGTCGACTGGACCACACAC	1845	1867	1857	1.5688	575
Ref370	Yeh C.-T., Chu C.-M., Liaw Y.-F.	Distinct composition of viral quasispecies between ascites and serum samples from patients with late stage chronic hepatitis C	1996	Biochemical and Biophysical Research Communications	227	2	524	http://www.scopus.com/inward/record.url?eid=2-s2.0-0030583564&partnerID=40&md5=3224d104998618fdc4faf9c7b364fe44	8878547		evolution	ATGGTGGGGAACTGGGCTAAG	1431	1451	1442	1.8128	GGTGAAGCAATACACCGGACC	1851	1871	1862	1.5572	441
Ref371	Yeh C.-T., Lu S.-C., Chu C.-M., Liaw Y.-F.	Molecular cloning of a defective hepatitis C virus genome from the ascitic fluid of a patient with hepatocellular carcinoma	1997	Journal of General Virology	78	11	2761	http://www.scopus.com/inward/record.url?eid=2-s2.0-0030711769&partnerID=40&md5=6807d12eb10e2ef83e01d9d07fd50ce3	9367361		evolution	5'Race	1				PolyA primer		9427			9427
Ref372	Yokoyama K., Takahashi M., Nishizawa T., Nagashima S., Jirintai S., Yotsumoto S., Okamoto H., Momoi M.Y.	Identification and characterization of a natural inter-genotypic (2b/1b) recombinant hepatitis C virus in Japan	2011	Archives of Virology	156	9	1591	http://www.scopus.com/inward/record.url?eid=2-s2.0-80052197922&partnerID=40&md5=64383cc62c3b420c79c96133d1c53e49	21643787		evolution	5'Race	1				9443		9443			9443
Ref373	Yong Yuan Zhang, Lok A.S.F., Chan D.T.M., Widell A.	Greater diversity of hepatitis C virus genotypes found in Hong Kong than in Mainland China	1995	Journal of Clinical Microbiology	33	11	2931	http://www.scopus.com/inward/record.url?eid=2-s2.0-0028834475&partnerID=40&md5=45305a72f23694a9b57ea2ce7b4695c7	8576348	[Ref398] and [Ref355]	Epidemiology	GGAACTACTGTCTTCACGCAGA	51	72	62	1.95	TCGCAAGCACCCTATCAGGCAG	289	310	300	1.926	260
Ref373	Yong Yuan Zhang, Lok A.S.F., Chan D.T.M., Widell A.	Greater diversity of hepatitis C virus genotypes found in Hong Kong than in Mainland China	1995	Journal of Clinical Microbiology	33	11	2931	http://www.scopus.com/inward/record.url?eid=2-s2.0-0028834475&partnerID=40&md5=45305a72f23694a9b57ea2ce7b4695c7	8576348	[Ref398] and [Ref355]	Epidemiology	TAGATTGGGTGTGCGCGCGA	467	486	477	1.92208	AGGTTCCCTGTTGCATAATT	828	847	838	1.452	381
Ref374	Yoshioka K., Aiyama T., Okumura A., Takayanagi M., Iwata K., Ishikawa T., Nagai Y., Kakumu S.	Humoral immune response to the hypervariable region of hepatitis C virus differs between genotypes 1b and 2a	1997	Journal of Infectious Diseases	175	3	505	http://www.scopus.com/inward/record.url?eid=2-s2.0-0031024880&partnerID=40&md5=f5c33414ea76952148b43e04c56ea10d	9041320		evolution	ATCCGAATTCTGGCCGCTGGGGTGGACGC	1463	1491	1478	1.8436	GCCAGAGCTCTTAATGAGCTGGATGTTCTG	1566	1595	1581	1.21	133
Ref375	Yoshioka K., Higashi Y., Tanaka K., Aiyama T., Takayanagi M., Okumura A., Iwata K., Nagai Y., Kakumu S.	Deficiency of antibody response to hypervariable region of hepatitis C virus in patients with chronic hepatitis C	1996	Journal of Hepatology	24	6	649	http://www.scopus.com/inward/record.url?eid=2-s2.0-0030175958&partnerID=40&md5=0d5e549e3292df0eef687653640a249a	8835738	[Ref396	Natural history	GTGGGGATCCGGGCTAAGGT	1434	1453	1444	1.7644	GTGAAGGAATTCACTGGACCACA	1848	1870	1860	1.5648	437
Ref376	Yoshioka K., Ito H., Watanabe K., Yano M., Ishigami M., Mizutani T., Sasaki Y., Goto H.	Interferon sensitivity-determining region of nonstructural region 5A of hepatitis C virus genotype 1b correlates with serum alanine aminotransferase levels in chronic infection	2005	Journal of Viral Hepatitis	12	2	139	http://www.scopus.com/inward/record.url?eid=2-s2.0-14844303330&partnerID=40&md5=5e2f522f995d6681b437534e05e226f5	15720528		Treatment response/resistance	CAAGCGTAGGCTGGCCAGGG (TCACCGACCCCTCTCATATTAC)	6865	6886	6876	1.4652	GTTTTCGCAGGATCTCCGCCG	8249	8269	8260	1.7972	1405
Ref377	Yoshioka K., Kakumu S., Wakita T., Ishikawa T., Itoh Y., Takayanagi M., Higashi Y., Shibata M., Morishima T.	Detection of hepatitis C virus by polymerase chain reaction and response to interferon-Î± therapy: Relationship to genotypes of hepatitis C virus	1992	Hepatology	16	2	293	http://www.scopus.com/inward/record.url?eid=2-s2.0-0026734297&partnerID=40&md5=2392cebe7778a45ca40fe7ddce6b0edf	1322348		Treatment response/resistance	CTGTGAGGAACTACTGTCTT	45	64	55	1.94	AACACTACTCGGCTAGCAGT	246	265	256	1.9444	221
Ref378	Young K.-C., Lin P.-W., Hsiao W.-C., Chang T.-T., Chang Y.-C., Wu H.-L.	Variation of hepatitis C virus load, hypervariable region 1 quasispecies and CD81 hepatocyte expression in hepatocellular carcinoma and adjacent non-cancerous liver	2002	Journal of Medical Virology	68	2	188	http://www.scopus.com/inward/record.url?eid=2-s2.0-0036779287&partnerID=40&md5=a1b18c61cb2a32d52d5722c5acf502f3	12210407		Natural history	TTCACGCAGAAAGCGTCTAG	63	82	73	1.9576	GTTGATCCAAGAAAGGACCC	188	207	198	1.8708	145
Ref379	Young K.-C., Lindsay K.L., Lee K.-J., Liu W.-C., He J.-W., Milstein S.L., Lai M.M.C.	Identification of a ribavirin-resistant NS5B mutation of hepatitis C virus during ribavirin monotherapy	2003	Hepatology	38	4	869	http://www.scopus.com/inward/record.url?eid=2-s2.0-0141755411&partnerID=40&md5=8e0f8aa4097bec87f134f0a83b4ac499	14512874		Treatment response/resistance	GAGAGCGACATCCGTACGGAGGAG	8289	8312	8301	1.77	AAAAAAAAAAAACAGGAAATGGCTTAAG-	9402	9429	9416	1.7824	1141
Ref380	Youssef A., Yano Y., Utsumi T., Abd El-Alah E.M.M., Abd El-Hameed A.E.-E.S., Serwah A.E.-H.A., Hayashi Y.	Molecular epidemiological study of hepatitis viruses in Ismailia, Egypt	2009	Intervirology	52	3	123	http://www.scopus.com/inward/record.url?eid=2-s2.0-66049152211&partnerID=40&md5=ac2c16707ef7dda4e2d2c41ee79e596b	19468235	[Ref001]	Epidemiology	TATGACACCCGCTGCTTTGAC	8256	8278	8268	1.8172	CCTGGTCATAGCCTCCGTGAA	8616	8636	8627	1.5832	381
Ref381	Yun Z., Lara C., Johansson B., Lorenzana De Rivera I., Sonnerborg A.	Discrepancy of hepatitis C virus genotypes as determined by phylogenetic analysis of partial NS5 and core sequences	1996	Journal of Medical Virology	49	3	155	http://www.scopus.com/inward/record.url?eid=2-s2.0-0029785616&partnerID=40&md5=b53f1723588023165d4cdf3ad2ed3fe9	8818959	New PCR, plus [Ref395]	Genotyping/classification	GGGGCCCTTGTTTGGGTGTG	460	479	470	1.90728	CACGTIAGGGTATCGATGAC	705	724	715	1.5424	265
Ref381	Yun Z., Lara C., Johansson B., Lorenzana De Rivera I., Sonnerborg A.	Discrepancy of hepatitis C virus genotypes as determined by phylogenetic analysis of partial NS5 and core sequences	1996	Journal of Medical Virology	49	3	155	http://www.scopus.com/inward/record.url?eid=2-s2.0-0029785616&partnerID=40&md5=b53f1723588023165d4cdf3ad2ed3fe9	8818959	New PCR, plus [Ref395]	Genotyping/classification	TCTCCATGGTGGGGAACT	1426	1443	1435	1.7724	CATTGCAGTTCAGGGCCGT	1614	1632	1624	1.7704	207
Ref381	Yun Z., Lara C., Johansson B., Lorenzana De Rivera I., Sonnerborg A.	Discrepancy of hepatitis C virus genotypes as determined by phylogenetic analysis of partial NS5 and core sequences	1996	Journal of Medical Virology	49	3	155	http://www.scopus.com/inward/record.url?eid=2-s2.0-0029785616&partnerID=40&md5=b53f1723588023165d4cdf3ad2ed3fe9	8818959	New PCR, plus [Ref395]	Genotyping/classification	TGGGGATCCCGTATGATACCCGCTGCTTTGA	8245	8275	8261	1.7908	GGCGGAATTCCTGGTCATAGCCTCCGTGAA	8616	8645	8631	1.5956	401
Ref382	Yun Z.B., Odeberg J., Lundeberg J., Weiland O., Uhlen M., Sonnerborg A.	Restriction of hepatitis C virus heterogeneity during prolonged interferon-Î± therapy in relation to changes in virus load	1996	Journal of Infectious Diseases	173	4	992	http://www.scopus.com/inward/record.url?eid=2-s2.0-0029888656&partnerID=40&md5=96dfe8f8890a3a79e816ef2b658e9bb9	8603982		Natural history	GGGGAACTGGGCIAAGGTC	1436	1454	1446	1.7816	TTCAGIGCIGTICIRTTGATG-	1604	1624	1615	1.5996	189
Ref383	Zehender G., De Maddalena C., Bernini F., Ebranati E., Monti G., Pioltelli P., Galli M.	Compartmentalization of hepatitis C virus quasispecies in blood mononuclear cells of patients with mixed cryoglobulinemic syndrome	2005	Journal of Virology	79	14	9145	http://www.scopus.com/inward/record.url?eid=2-s2.0-21644448547&partnerID=40&md5=10b2fa46c495ee686bcd5f2ffa2986c2	15994809		Natural history	GCTTGGGATATGATGATGAACTGGTC	1296	1321	1309	1.7116	GGTGTGGAGGGAGTCATTGCAGTT3	1623	1646	1635	1.8264	351
Ref384	Zein N.N., Rakela J., Krawitt E.L., Reddy K.R., Tominaga T., Persing D.H.	Hepatitis C Virus Genotypes in the United States: Epidemiology, Pathogenicity, and Response to Interferon Therapy	1996	Annals of Internal Medicine	125	8	634	http://www.scopus.com/inward/record.url?eid=2-s2.0-0030587906&partnerID=40&md5=2cc8399f4621784a297b2e5ac8fda579	8849147		Genotyping/classification	TGGGGATCCCGTATGATACCCGCTGCTTTGA	8245	8275	8261	1.7908	CGCGGAATTCCTGGTCATAGCCTCCGTGAA	8616	8645	8631	1.5956	401
Ref385	Zekri A.R.N., El-Din H.M.A., Bahnassy A.A., El-Shehabi A.M.R., El-Leethy H., Omar A., Khaled H.M.	TRUGENE sequencing versus INNO-LiPA for sub-genotyping of HCV genotype-4	2005	Journal of Medical Virology	75	3	412	http://www.scopus.com/inward/record.url?eid=2-s2.0-12944300275&partnerID=40&md5=9a40f67dade092e51a1cf050fb972df8	15648068	TrueGene 5'NC [Ref266]	Genotyping/classification		96						278			183
Ref386	Zeuzem S., Ruster B., Lee J.-H., Stripf T., Roth W.K.	Evaluation of a reverse hybridization assay for genotyping of hepatitis C virus	1995	Journal of Hepatology	23	6	654	http://www.scopus.com/inward/record.url?eid=2-s2.0-0029582744&partnerID=40&md5=22d591e508aae882baad7cfb0a3da991	8750163	[Ref032] and [Ref394]	Genotyping/classification	ACGCAGAAAGCGTCTAGCCATGGCGTTAGT	66	95	81	1.956	TCCCGGGGCACTCGCAAGCACCCTATCAGG	292	321	307	1.926	256
Ref386	Zeuzem S., Ruster B., Lee J.-H., Stripf T., Roth W.K.	Evaluation of a reverse hybridization assay for genotyping of hepatitis C virus	1995	Journal of Hepatology	23	6	654	http://www.scopus.com/inward/record.url?eid=2-s2.0-0029582744&partnerID=40&md5=22d591e508aae882baad7cfb0a3da991	8750163	[Ref032] and [Ref394]	Genotyping/classification	CTCCACAGTCACTGAGAGCGACATCCGTAC	8276	8305	8291	1.7776	ATAGCCTCCGTGAAGGCTCTCAGGCTCGCC	8600	8629	8615	1.6808	354
Ref387	Zeuzem S., Scheuermann E.H., Waschk D., Lee J.-H., Blaser C., Franke A., Roth W.K.	Phylogenetic analysis of hepatitis C virus isolates from hemodialysis patients	1996	Kidney International	49	3	896	http://www.scopus.com/inward/record.url?eid=2-s2.0-0029932803&partnerID=40&md5=ab33efc68a443c072afd6b11122009b1	8648935	[Ref032], [Ref393] and [Ref394]	Clustering/transmission	ACGCAGAAAGCGTCTAGCCATGGCGTTAGT	66	95	81	1.956	TCCCGGGGCACTCGCAAGCACCCTATCAGG	292	321	307	1.926	256
Ref387	Zeuzem S., Scheuermann E.H., Waschk D., Lee J.-H., Blaser C., Franke A., Roth W.K.	Phylogenetic analysis of hepatitis C virus isolates from hemodialysis patients	1996	Kidney International	49	3	896	http://www.scopus.com/inward/record.url?eid=2-s2.0-0029932803&partnerID=40&md5=ab33efc68a443c072afd6b11122009b1	8648935	[Ref032], [Ref393] and [Ref394]	Clustering/transmission	CTCCACAGTCACTGAGAGCGACATCCGTAC	8276	8305	8291	1.7776	ATAGCCTCCGTGAAGGCTCTCAGGCTCGCC	8600	8629	8615	1.6808	354
Ref388	Zhang S., Wang W., Zhou K., Liu H.	Sequence variations of the hypervariable region of hepatitis C virus and their clinical significance	2000	Chinese Medical Journal	113	12	1075	http://www.scopus.com/inward/record.url?eid=2-s2.0-0034584149&partnerID=40&md5=5e1c0208884e102f3a6a5af830c51e39	11776139		Natural history	GCTTGGGATATGATGATGAACTGGTC	1296	1321	1309	1.7116	TTAGGGCGGTGCGGTTGATGTGCCA	1599	1623	1612	1.5172	328
Ref390	Zhou D., Fan X., Tan D., Xu Y., Tavis J.E., Di Bisceglie A.M.	Separation of near full-length hepatitis C virus quasispecies variants from a complex population	2007	Journal of Virological Methods	141	2	220	http://www.scopus.com/inward/record.url?eid=2-s2.0-33947505046&partnerID=40&md5=15143f2f43fc12da051201593af5bc3b	17208310		evolution	CATAGTGGTCTGCGGAACCGGT	139	160	150	1.9548	atggcagccctacctcctctgg	9139	9160	9150	1.76	9022
Ref391	Zhou Y.-H., Moriyama M., Esumi M.	Multiple sequence-reactive antibodies induced by a single peptide immunization with hypervariable region 1 of hepatitis C virus	1999	Virology	256	2	360	http://www.scopus.com/inward/record.url?eid=2-s2.0-0033541372&partnerID=40&md5=8907504a55a334a46bcedb13dd9c353d	10191201		Natural history	CATGGCGGGGAACTGGGCTAAGGT	1430	1453	1442	1.8128	CAGGGCAGTCCTGTTGATGTGCCA	1599	1622	1611	1.4708	193
Ref392	Zucker K., Cirocco R., Roth D., Olson L., Burke G.W., Nery J., Esquenazi V., Miller J.	Depletion of hepatitis C virus from procured kidneys using pulsatile perfusion preservation	1994	Transplantation	57	6	832	http://www.scopus.com/inward/record.url?eid=2-s2.0-0028347529&partnerID=40&md5=8c215a0830da26641c056f5b8a0af8c2	8154030		Genotyping/classification	AACTACTGTCTTCACGCAGAAAGC	53	76	65	1.9564	CCCAACCACTACTCGGCTAG	250	268	260	1.9404	216
Ref395	Simmonds P, Holmes EC, Cha TA, Chan SW, McOmish F, Irvine B, Beall E, Yap PL, Kolberg J, Urdea MS.	Classification of hepatitis C virus into six major genotypes and a series of subtypes by phylogenetic analysis of the NS-5 region.	1993	Journal of General Virology	74	11	2391	http://www.ncbi.nlm.nih.gov/pubmed/8245854		[Ref079], and [Ref397]	Genotyping/classification	TGGGGATCCCGTATGATACCCGCTGCTTTGA	8245	8275	8261	1.7908	GGCGGAATTCCTGGTCATAGCCTCCGTGAA	8616	8645	8631	1.5956	401
Ref396	Higashi Y, Kakumu S, Yoshioka K, Wakita T, Mizokami M, Ohba K, Ito Y, Ishikawa T, Takayanagi M, Nagai Y.	Dynamics of genome change in the E2/NS1 region of hepatitis C virus in vivo.	1993	Virology	197	2	659	http://www.ncbi.nlm.nih.gov/pubmed/8249288			Genotyping/classification	GTGGGGATCCGGGCTAAGGT	1434	1453	1444	1.7644	GTGAAGGAATTCACTGGACCACA	1848	1870	1860	1.5648	437
Ref397	Chan SW, McOmish F, Holmes EC, Dow B, Peutherer JF, Follett E, Yap PL, Simmonds P.	Analysis of a new hepatitis C virus type and its phylogenetic relationship to existing variants.	1993	Journal of General Virology	73	5	1131	http://www.ncbi.nlm.nih.gov/pubmed/1316939		[Ref448], [Ref79], [Ref447], [Ref407] (see [ref424])	Genotyping/classification	TTCACGCAGAAAGCGTCTAG	63	82	73	1.9576	CACTCTCGAGCACCCTATCAGGCAGT	288	313	301	1.9248	251
Ref397	Chan SW, McOmish F, Holmes EC, Dow B, Peutherer JF, Follett E, Yap PL, Simmonds P.	Analysis of a new hepatitis C virus type and its phylogenetic relationship to existing variants.	1993	Journal of General Virology	73	5	1131	http://www.ncbi.nlm.nih.gov/pubmed/1316939		[Ref448], [Ref79], [Ref447], [Ref407] (see [ref424])	Genotyping/classification	AGGTCTCGTAGACCGTGCATCATGAGCAC	321	349	336	1.8912	ATGTACCCCATGAGGTCGGC	732	751	742	1.5604	431
Ref397	Chan SW, McOmish F, Holmes EC, Dow B, Peutherer JF, Follett E, Yap PL, Simmonds P.	Analysis of a new hepatitis C virus type and its phylogenetic relationship to existing variants.	1993	Journal of General Virology	73	5	1131	http://www.ncbi.nlm.nih.gov/pubmed/1316939		[Ref448], [Ref79], [Ref447], [Ref407] (see [ref424])	Genotyping/classification	CATATAGATGCCCACTTCCTATC	5040	5062	5052	1.8024	GTATTTGGTGACTGGGTGCGTC	5252	5273	5263	1.65364	234
Ref397	Chan SW, McOmish F, Holmes EC, Dow B, Peutherer JF, Follett E, Yap PL, Simmonds P.	Analysis of a new hepatitis C virus type and its phylogenetic relationship to existing variants.	1993	Journal of General Virology	73	5	1131	http://www.ncbi.nlm.nih.gov/pubmed/1316939		[Ref448], [Ref79], [Ref447], [Ref407] (see [ref424])	Genotyping/classification	CTCAACCGTCACTGAACAGGACAT	8276	8299	8288	1.7992	CCACGACTAGATCATCTCCG	8569	8589	8580	1.554	314
Ref400	Yeh, C. T., Han, C. M., Lo, S. Y., et al. (1994) J. Clin. Microbiol. 32, 2235–2241	Early detection of anti-HCc antibody in acute hepatitis C virus (HCV) by western blot (immunoblot) using a recombinant HCV core protein fragment.	1994	Journal of Clinical Microbiology	32		2235	http://jcm.asm.org/content/32/9/2235.abstract			Genotyping/classification	CCGTGCGAATTCAGCACGAAT	333	353	344	1.8672	GTCGGCGAATTCTCACGTAAG	717	737	728	1.5232	405
Ref401	Murphy DG, Willems B, Deschênes M, Hilzenrat N, Mousseau R, Sabbah S.	Use of sequence analysis of the NS5B region for routine genotyping of hepatitis C virus with reference to C/E1 and 5' untranslated region sequences.	2007	Journal of Clinical Microbiology	45	4	1102	http://www.ncbi.nlm.nih.gov/pubmed/17287328			Genotyping/classification	GAAAGCGTCTAGCCATGGCGTTAGT	71	95	84	1.9492	CTCGCAAGCACCCTATCAGG	292	311	302	1.9256	241
Ref401	Murphy DG, Willems B, Deschênes M, Hilzenrat N, Mousseau R, Sabbah S.	Use of sequence analysis of the NS5B region for routine genotyping of hepatitis C virus with reference to C/E1 and 5' untranslated region sequences.	2007	Journal of Clinical Microbiology	45	4	1102	http://www.ncbi.nlm.nih.gov/pubmed/17287328			Genotyping/classification	GCAACAGGGAAYYTDCCYGGTTGCTC	834	859	847	1.4756	GTRGGNGACCARTTCATCATCA	1306	1327	1317	1.7352	494
Ref401	Murphy DG, Willems B, Deschênes M, Hilzenrat N, Mousseau R, Sabbah S.	Use of sequence analysis of the NS5B region for routine genotyping of hepatitis C virus with reference to C/E1 and 5' untranslated region sequences.	2007	Journal of Clinical Microbiology	45	4	1102	http://www.ncbi.nlm.nih.gov/pubmed/17287328			Genotyping/classification	TTCTCRTATGAYACCCGCTGYTTTGA	8250	8275	8263	1.832	TACCTVGTCATAGCCTCCGTGAA	8616	8638	8628	1.5672	389
Ref402	Enomoto N, Sakuma I, Asahina Y, Kurosaki M, Murakami T, Yamamoto C, Izumi N, et al.	Comparison of full-length sequences of interferon-sensitive and resistant hepatitis c virus 1b—sensitivity to interferon is conferred by amino acid substitutions in the NS5A region.	1995	Journal of clinical investigation	96		224	http://www.ncbi.nlm.nih.gov/pmc/articles/PMC185192/			Treatment response/resistance	5'Race	13				3'Race		9427			9415
Ref403	Mellor J, Holmes EC, Jarvis LM, Yap PL, Simmonds P.	Investigation of the pattern of hepatitis C virus sequence diversity in different geographical regions: implications for virus classification. The International HCV Collaborative Study Group.	1995	Journal of General Virology	76	10	2493	http://www.ncbi.nlm.nih.gov/pubmed/7595353			Genotyping/classification	AGGTCTCGTAGACCGTGCATCATG	321	344	333	1.9112	CACGTAAGGGTATCGATGAC	705	724	715	1.5424	404
Ref403	Mellor J, Holmes EC, Jarvis LM, Yap PL, Simmonds P.	Investigation of the pattern of hepatitis C virus sequence diversity in different geographical regions: implications for virus classification. The International HCV Collaborative Study Group.	1995	Journal of General Virology	76	10	2493	http://www.ncbi.nlm.nih.gov/pubmed/7595353			Epidemiology	ATGGGGTTCTCGTATGATACCCGCTGCTTTGACTC	8244	8278	8262	1.8	GCTCTCAGGTTCCGCTCGTCCTCC	8591	8614	8603	1.7288	371
Ref404	Alter MJ, Kruszon-Moran D, Nainan OV, McQuillan GM, Gao F, Moyer LA, Kaslow RA, Margolis HS.	The prevalence of hepatitis C virus infection in the United States, 1988 through 1994.	1999	New England Journal of Medicine	341	8	556	http://www.ncbi.nlm.nih.gov/pubmed/10451460		[Ref395]	Genotyping/classification	TGGGGATCCCGTATGATACCCGCTGCTTTGA	8245	8275	8261	1.7908	GGCGGAATTCCTGGTCATAGCCTCCGTGAA	8616	8645	8631	1.5956	401
Ref408	Dev AT, McCaw R, Sundararajan V, Bowden S, Sievert W.	Southeast Asian patients with chronic hepatitis C: the impact of novel genotypes and race on treatment outcome.	2002	Hepatology	36	5		http://www.ncbi.nlm.nih.gov/pubmed/12395338		[Ref491], [Ref492]	Treatment response/resistance	TAG GGT GCT TGC GAG TGC CCC G	300	318	310	1.924	AGG GTA TCG ATG ACC TTA C	700	715	708	1.476	416
Ref410	Stuyver L, Rossau R, Wyseur A, et al.	Typing of hepatitis C virus isolates and characterization of new subtypes using a line probe assay.	1993	Journal of General Virology	74			http://www.ncbi.nlm.nih.gov/pubmed/8389799			Genotyping/classification	TCTAGCCATGGCGTTAGTRYGAGTGT	78	103	91	1.9452	CACTCGCAAGCACCCTATCAGGCAGT	288	313	301	1.9248	236
Ref411	Fujii K, Hino K, Okazaki M et al.	Differences in hypervariable region 1 quasispecies of hepatitis C virus between human serum and peripheral blood mononuclear cells.	1996	Biochem Biophys Res Commun	225		771	http://www.ncbi.nlm.nih.gov/pubmed/8780688			evolution	GGCCTTGCCTACTATTCCAT	1413	1432	1423	1.7108	GTCCTGTTGATGTGCCA	1599	1615	1608	1.4888	203
Ref414	Morice Y, Roulot D, Grando V, Stirnemann J, Gault E, et al.	Phylogenetic analyses confirm the high prevalence of hepatitis C virus (HCV) type 4 in the Seine-Saint-Denis district (France) and indicate seven different HCV-4 subtypes linked to two different epidemiological patterns.	2001	Journal of General Virology	82		1001	http://vir.sgmjournals.org/content/82/5/1001.long			Epidemiology	ACGGGATYAAYTATGCAACAGG	820	841	831	1.404	STCBACCCCRGCAAAGAGG	1469	1487	1479	1.8456	668
Ref414	Morice Y, Roulot D, Grando V, Stirnemann J, Gault E, et al.	Phylogenetic analyses confirm the high prevalence of hepatitis C virus (HCV) type 4 in the Seine-Saint-Denis district (France) and indicate seven different HCV-4 subtypes linked to two different epidemiological patterns.	2001	Journal of General Virology	82		1001	http://vir.sgmjournals.org/content/82/5/1001.long			Epidemiology	TATGAYACCCGCTGYTTTGACTC	8256	8278	8268	1.8172	GCNGARTAYCTVGTCATAGCCTC	8622	8644	8634	1.5648	389
Ref415	Laskus T, Radkowski M, Wang LF, Nowicki M, Rakela J.	Uneven distribution of hepatitis C virus quasispecies in tissues from subjects with end-stage liver disease: confounding effect of viral adsorption and mounting evidence for the presence of low-level extrahepatic replication.	2000	Journal of Virology	74	2		http://www.ncbi.nlm.nih.gov/pubmed/10623766		[Ref457]	Natural history	ACTGTCTTCACGCAGAAAGCGTC	57	79	69	1.9564	CAAGCACCCTATCAGGCAGTACC	285	307	297	1.9668	251
Ref415	Laskus T, Radkowski M, Wang LF, Nowicki M, Rakela J.	Uneven distribution of hepatitis C virus quasispecies in tissues from subjects with end-stage liver disease: confounding effect of viral adsorption and mounting evidence for the presence of low-level extrahepatic replication.	2000	Journal of Virology	74	2		http://www.ncbi.nlm.nih.gov/pubmed/10623766		[Ref457]	Natural history	GCTGCTCCGGATCCCACA	1349	1366	1358	1.6716	AGGCTATCATTGCAACCAG	1619	1639	1630	1.7632	291
Ref416	Weiner AJ, Geysen HM, Christopherson C, Hall JE, Mason TJ, Saracco G, Bonino F, Crawford K, Marion CD, Crawford KA, et al.	Evidence for immune selection of hepatitis C virus (HCV) putative envelope glycoprotein variants: potential role in chronic HCV infections.	1992	Proceedings of the National Academy of Sciences of the United States of America	89	8		http://www.ncbi.nlm.nih.gov/pubmed/1314389		[Ref466]	Natural history	GCAATTTGGGTAAGGTCATCGATACCCTTACG	691	722	707	1.4712	AGCCGGTGTTGAGGCTATCATTGCAGTTC	1622	1650	1637	1.876	960
Ref417	FERAY, C., SAMUEL, n., THIERS, V., GIGOU, M., PICHON, F., BISMUTH, A., REYNES, A. M., MAISONNEUVE, P., BISMUTH, H. & BR~2HOT, C.	Reinfection of liver graft by hepatitis C virus after liver transplantation.	1992	Journal of Clinical Investigation	89			http://www.ncbi.nlm.nih.gov/pmc/articles/PMC442999/			evolution	TCCATGGTGGGGAACTGGGC	1428	1447	1438	1.7992	GGCTTTGGGGGGTAGTCCA	1800	1819	1810	1.34	392
Ref418	Simmonds P, Rose KA, Graham S, Chan SW, McOmish F, Dow BC, Follett EAC, Yap PL, Marsden H:	Mapping of serotype-specific, immunodominant epitopes in the NS4 region of hepatitis C virus (HCV): use of type-specific peptides to serologically differentiate infections with HCV types 1,2, and 3.	1993	J Clin Microbiol	31			http://jcm.asm.org/content/31/6/1493.full.pdf+html			Genotyping/classification	CAGACTGGGCGCCGTTCAGAATG	5219	5241	5231	1.8164	AACTCGAGTATCCCACTGATGAAGTTCCACAT	5634	5665	5650	1.6944	447
Ref419	Wilson, J. J., S. J. Polyak, T. D. Day, and D. R. Gretch.	Characterization of simple and complex hepatitis C virus quasispecies by heteroduplex gel shift analysis: correlation with nucleotide sequencing.	1995	J. Gen. Virol.	76			http://www.ncbi.nlm.nih.gov/pubmed/9049381		[Ref466]	Genotyping/classification	GCAATTTGGGTAAGGTCATCGATACCCTTACG	691	722	707	1.4712	AGCCGGTGTTGAGGCTATCATTGCAGTTC	1622	1650	1637	1.876	960
Ref420	Cammarota, G., F. Maggi, M. L. Vatteroni, L. Da Prato, L. Barsanti, M. Bendinelli, and M. Pistello.	Partial nucleotide sequencing of six subtype 2c hepatitis C viruses detected in Italy.	1995	J. Clin. Microbiol.	33			http://jcm.asm.org/content/33/10/2781.long		[Ref236] and [Ref395]	Genotyping/classification	TAGATTGGGTGTGCGCGCGA	467	486	477	1.92208	AGGTTCCCTGTTGCATAATT	828	847	838	1.452	381
Ref420	Cammarota, G., F. Maggi, M. L. Vatteroni, L. Da Prato, L. Barsanti, M. Bendinelli, and M. Pistello.	Partial nucleotide sequencing of six subtype 2c hepatitis C viruses detected in Italy.	1995	J. Clin. Microbiol.	33			http://jcm.asm.org/content/33/10/2781.long		[Ref236] and [Ref395]	Genotyping/classification	TGGGGATCCCGTATGATACCCGCTGCTTTGA	8245	8275	8261	1.7908	GGCGGAATTCCTGGTCATAGCCTCCGTGAA	8616	8645	8631	1.5956	401
Ref423	TOKITA, H., OKAMOTO, H., TSUDA, F., SONG, P., NAKATA, S., CHOSA, T., IIZUKA, H., MISHIRO, S., MIYAKAWA, Y. & MAYUMI, M.	Hepatitis C virus variants from Vietnam are classifiable into the seventh, eighth, and ninth major genetic groups	1994	Proceedings of the National Academy of Sciences, USA	91			http://www.pnas.org/content/91/23/11022.short		[Ref236], [Ref237] and [Ref321]	Genotyping/classification	5'Race	1				ACCGGATCCGCAGACCACTCT	140	160	151	1.954	160
Ref423	TOKITA, H., OKAMOTO, H., TSUDA, F., SONG, P., NAKATA, S., CHOSA, T., IIZUKA, H., MISHIRO, S., MIYAKAWA, Y. & MAYUMI, M.	Hepatitis C virus variants from Vietnam are classifiable into the seventh, eighth, and ninth major genetic groups	1994	Proceedings of the National Academy of Sciences, USA	91			http://www.pnas.org/content/91/23/11022.short		[Ref236], [Ref237] and [Ref321]	Genotyping/classification		63						1606			1544
Ref423	TOKITA, H., OKAMOTO, H., TSUDA, F., SONG, P., NAKATA, S., CHOSA, T., IIZUKA, H., MISHIRO, S., MIYAKAWA, Y. & MAYUMI, M.	Hepatitis C virus variants from Vietnam are classifiable into the seventh, eighth, and ninth major genetic groups	1994	Proceedings of the National Academy of Sciences, USA	91			http://www.pnas.org/content/91/23/11022.short		[Ref236], [Ref237] and [Ref321]	Genotyping/classification		8259						9449			1191
Ref424	Okada S, Akahane Y, Suzuki H, Okamoto H, Mishiro S.	The degree of variability in the amino terminal region of the E2/NS1 protein of hepatitis C virus correlates with responsiveness to interferon therapy in viremic patients.	1992	Hepatology	16			http://onlinelibrary.wiley.com.wwwproxy0.library.unsw.edu.au/doi/10.1002/hep.1840160302/pdf		[Ref407], primers detailed.	Treatment response/resistance	GGGACATGATGATCAACTGG	1300	1319	1310	1.7108	GBGAAGGAATTCACTGGGCCACA	1848	1870	1860	1.5648	571
Ref425	Hmaied F., et al.	Determining the source of nosocomial transmission in hemodialysis units in Tunisia by sequencing NS5B and E2 sequences of HCV.	2007	J. Med. Virol.	79			http://onlinelibrary.wiley.com.wwwproxy0.library.unsw.edu.au/doi/10.1002/jmv.20877/pdf		[Ref275] plus [Ref426]	Clustering/transmission	CACTGGGGAGTCCTGGCGGG	1395	1414	1405	1.7092	ATGTGCCAGCTGCCATTGGT	1587	1606	1597	1.3968	212
Ref426	Izopet J, Pasquier C, Sandres K, Puel J, Rostaing L.	Molecular evidence for nosocomial transmission of hepatitis C virus in a French hemodialysis unit.	1999	J Med Virol	58			http://onlinelibrary.wiley.com/doi/10.1002/%28SICI%291096-9071%28199906%2958:2%3C139::AID-JMV7%3E3.0.CO;2-7/pdf			Clustering/transmission	CACTGGGAGTCCTGGCGGG	1395	1414	1405	1.7092	ATGTGCCAGCTGCCATTGGT	1587	1606	1597	1.3968	212
Ref428	Stuyver, L., Van Arnhem, W., Wyseur, A., DeLeys, R. & Maertens, G.	Analysis of the Putative E1 Envelope and NS4a Epitope Regions of HCV Type 3	1993	Biochem. Biophys. Res. Commun.	192			http://pdn.sciencedirect.com/science?_ob=MiamiImageURL&_cid=272308&_user=1975841&_pii=S0006291X83714622&_check=y&_origin=article&_zone=toolbar&_coverDate=30-Apr-1993&view=c&originContentFamily=serial&wchp=dGLzVlV-zSkWz&md5=e1a4abea75d7ad1babea2759e214c9e8/1-s2.0-S0006291X83714622-main.pdf			Genotyping/classification	CTCATGGGGTACATTCCGCT	738	757	748	1.5484	CTATTACCAGTTCATCATCATATCCCA	1299	1325	1313	1.7556	588
Ref428	Stuyver, L., Van Arnhem, W., Wyseur, A., DeLeys, R. & Maertens, G.	Analysis of the Putative E1 Envelope and NS4a Epitope Regions of HCV Type 3	1993	Biochem. Biophys. Res. Commun.	192			http://pdn.sciencedirect.com/science?_ob=MiamiImageURL&_cid=272308&_user=1975841&_pii=S0006291X83714622&_check=y&_origin=article&_zone=toolbar&_coverDate=30-Apr-1993&view=c&originContentFamily=serial&wchp=dGLzVlV-zSkWz&md5=e1a4abea75d7ad1babea2759e214c9e8/1-s2.0-S0006291X83714622-main.pdf			Genotyping/classification	GTGTGCCAGGACCATC	4989	5004	4997	1.7948	GACATGCATGTCATGATGTA	5271	5290	5281	1.76804	302
Ref428	Stuyver, L., Van Arnhem, W., Wyseur, A., DeLeys, R. & Maertens, G.	Analysis of the Putative E1 Envelope and NS4a Epitope Regions of HCV Type 3	1993	Biochem. Biophys. Res. Commun.	192			http://pdn.sciencedirect.com/science?_ob=MiamiImageURL&_cid=272308&_user=1975841&_pii=S0006291X83714622&_check=y&_origin=article&_zone=toolbar&_coverDate=30-Apr-1993&view=c&originContentFamily=serial&wchp=dGLzVlV-zSkWz&md5=e1a4abea75d7ad1babea2759e214c9e8/1-s2.0-S0006291X83714622-main.pdf			Genotyping/classification	ACCGGAGGCCAGGAGAGTGATCTCCTCC	8338	8366	8353	1.7784	GGGCTGCTCTATCCTCATCGACGCCATC	2580	8608	8595	1.7032	271
Ref430	McKechnie VM, Mills PR, McCruden EA.	The NS5a gene of hepatitis C virus in patients treated with interferon-alpha.	2000	J Med Virol	60			http://onlinelibrary.wiley.com/doi/10.1002/%28SICI%291096-9071%28200004%2960:4%3C367::AID-JMV2%3E3.0.CO;2-6/pdf			Treatment response/resistance	CCCTGTGAGCCAGAACCGGA	6822	6841	6832	1.5736	GAGTATGACATGGAGCAGCA	7596	7615	7606	1.8276	794
Ref430	McKechnie VM, Mills PR, McCruden EA.	The NS5a gene of hepatitis C virus in patients treated with interferon-alpha.	2000	J Med Virol	60			http://onlinelibrary.wiley.com/doi/10.1002/%28SICI%291096-9071%28200004%2960:4%3C367::AID-JMV2%3E3.0.CO;2-6/pdf			Treatment response/resistance	GCAGGAGATGGGCACAACAT	7043	7063	7054	1.8008	GAGTATGACATGGAGCAGCA	7596	7615	7606	1.8276	573
Ref431	Feucht, H. H., M. Schröter, B. Zöllner, S. Polywka, H. Nolte, and R. Laufs.	The influence of age on the prevalence of hepatitis C virus subtypes 1a and 1b.	1997	J. Infect. Dis.	175			http://www.jstor.org/openurl?volume=175&date=1997&spage=685&issn=00221899&issue=3			Epidemiology	ACTGAATTCTCGTATGATACCC	8244	8265	8255	1.7612	GTCAAGCTTCACAGATAAC	8565	8583	8575	1.5804	340
Ref432	Driesel G, Wirth D, Stark K, Baumgarten R, Sucker U, Schreier, E.	Hepatitis C virus (HCV) genotype distribution in German isolates: studies on the sequence variability in the E2 and NS5 region.	1994	Arch Virol	139			http://www.springerlink.com/content/n24h6132w6613116/			Epidemiology	AATGGATCCTCCATGGTGGGGAACTGGGC	1418	1447	1433	1.7488	GATGTGCCARCTGCCGTTGGT	1587	1607	1598	1.4164	190
Ref432	Driesel G, Wirth D, Stark K, Baumgarten R, Sucker U, Schreier, E.	Hepatitis C virus (HCV) genotype distribution in German isolates: studies on the sequence variability in the E2 and NS5 region.	1994	Arch Virol	139			http://www.springerlink.com/content/n24h6132w6613116/			Epidemiology	CTCAACTGTCACTGAAC	8276	8292	8285	1.8456	TCGTCTCCGCAGACAAG	8541	8557	8550	1.6508	282
Ref433	Bukh, J., C. L. Apgar, R. Engle, S. Govindarajan, P. A. Hegerich, R. Tellier, D. C. Wong, R. Elkins, and M. C. Kew.	Experimental infection of chimpanzees with hepatitis C virus of genotype 5a: genetic analysis of the virus and generation of a standardized challenge pool.	1998	J. Infect. Dis.	178			http://www.jstor.org/openurl?volume=178&date=1998&spage=1193&issn=00221899&issue=4		[Ref310] and [Ref362]	Natural history	ACGCAGAAAGCGTCTAGCCATGGCGTTAGT	66	95	81	1.956	AAATGTCTCCCCCGCTGTAGCCAGCCGTGAACC	9250	9282	9267	1.59	9217
Ref433	Bukh, J., C. L. Apgar, R. Engle, S. Govindarajan, P. A. Hegerich, R. Tellier, D. C. Wong, R. Elkins, and M. C. Kew.	Experimental infection of chimpanzees with hepatitis C virus of genotype 5a: genetic analysis of the virus and generation of a standardized challenge pool.	1998	J. Infect. Dis.	178			http://www.jstor.org/openurl?volume=178&date=1998&spage=1193&issn=00221899&issue=4		[Ref310] and [Ref362]	Natural history	GTCCAAGCTTATCACAGCGTGTCTCATGCCCGGCCCCG	9273	9310	9292	1.68	CGTCTCTAGACATGATCTGCAGAGAGGCCAGTATCAGCACTCTCTGC	9609	9646	9628	0	374
Ref435	Chen Z, Weck KE	Hepatitis C virus genotyping: Interrogation of the 5 ' untranslated region cannot accurately distinguish genotypes 1a and 1b	2002	JOURNAL OF CLINICAL MICROBIOLOGY	40			http://jcm.asm.org/content/40/9/3127			Genotyping/classification	CCGATTGGGGGCGACAC	9	25	18	0	CTCATGGTGCACGGTCTAC	328	346	338	1.8764	338
Ref435	Chen Z, Weck KE	Hepatitis C virus genotyping: Interrogation of the 5 ' untranslated region cannot accurately distinguish genotypes 1a and 1b	2002	JOURNAL OF CLINICAL MICROBIOLOGY	40			http://jcm.asm.org/content/40/9/3127			Genotyping/classification	GATACCCGCTGCTTTGACTC	8259	8278	8269	1.8316	CCTCCGTGAAGGCTCTCAG	8607	8625	8617	1.6436	367
Ref436	Ray S. C., Wang Y. M., Laeyendecker O., Ticehurst J., Villano S. A., Thomas D. L.	Acute hepatitis C virus structural gene sequences as predictors of persistent viremia: hypervariable region 1 as decoy. J. Virol. 73:2938–2946.	1998	J. Virol.	73			http://jvi.asm.org/content/73/4/2938.long			Natural history	AACCTTCCTGGTTGCTCTTTCTCTAT	843	868	856	1.4252	GAAGCAATAYTGYGGRCCACA	1848	1868	1859	1.5684	1026
Ref437	Quarleri, J. F., B. H. Robertson, V. L. Mathet, M. Feld, L. Espínola, M. P. Requeijo, O. Mandó, G. Carballal, and J. R. Oubiña.	Genomic and phylogenetic analysis of hepatitis C virus isolates from Argentine patients: a six-year retrospective study.	2000	J. Clin. Microbiol.	38			http://jcm.asm.org/content/38/12/4560.long		[Ref397], [Ref79] and [Ref438]	Epidemiology	GTGGTCTGCGGAACCGG	143	159	152	1.9552	GGGCACTCGCAAGCACCCTAT	296	316	307	1.926	174
Ref437	Quarleri, J. F., B. H. Robertson, V. L. Mathet, M. Feld, L. Espínola, M. P. Requeijo, O. Mandó, G. Carballal, and J. R. Oubiña.	Genomic and phylogenetic analysis of hepatitis C virus isolates from Argentine patients: a six-year retrospective study.	2000	J. Clin. Microbiol.	38			http://jcm.asm.org/content/38/12/4560.long		[Ref397], [Ref79] and [Ref438]	Epidemiology	TGGGGATCCCGTATGATACCCGCTGCTTTGA	8245	8275	8261	1.7908	GGCGGAATTCCTGGTCATAGCCTCCGTGAA	8616	8645	8631	1.5956	401
Ref438	Oubiña J. R., Quarleri J. F., Rudzinski M., Parks C., Badı́a I., González Cappa S. M.	Genomic characterization of hepatitis C virus from Argentina.	1995	J. Med. Virol.	47			http://onlinelibrary.wiley.com/doi/10.1002/jmv.1890470118/abstract?systemMessage=Wiley+Online+Library+will+be+disrupted+3+Mar+from+10-13+GMT+for+monthly+maintenance		[Ref439]	Genotyping/classification	GTGGTCTGCGGAACCGG	143	159	152	1.9552	GGGCACTCGCAAGCACCCTAT	296	316	307	1.926	174
Ref439	Novati R, Thiers V, d’Arminio Monforte A, Maisonneuve P, Principi P, Conti M, Lazzarin A, Brechot C	Mother-to-child transmission of hepatitis C virus detected by nested Polymerase Chain Reaction.	1992	The Journal of Infectious Diseases	165			http://www.jstor.org/stable/pdfplus/30112102.pdf?acceptTC=true			Clustering/transmission	GTGCAGCCTCCAGGACCCCC	105	124	115	1.9084	GGGCACTCGCAAGCACCCTAT	296	316	307	1.926	212
Ref443	KATo, N., OOTSUYAMA, Y., TANAKA, T., NAKAGAWA, M., NAKAZAWA, T., MUKAISO, K., OHKOSHI , S . , HI J IKATA, M. and S H I M O ~ O H N O , K.,	Marked sequence diversity in the putative envelope proteins of hepatitis C viruses.	1992	Virus Res.	22			http://www.sciencedirect.com/science/article/pii/016817029290038B			Natural history	CGAGCCTTGGAAITCATTCCATGGTGGGGAACTGG	1411	1445	1429	1.7512	CAGAGGTGAGAATTCGGGCTCGGAGTGAAGCAATA	1845	1874	1860	1.5648	464
Ref444	Smith DB, Pathirana S, Davidson E Lawlor M, Power J, Yap PL,	The origin of hepatitis C virus genotypes.	1997	J Gen Virol	78			http://vir.sgmjournals.org/content/78/2/321.long		[Ref397] and [Ref403]	Genotyping/classification	ACTGGATCCTACCATGTCACSAAYGAYTGC	933	962	948	1.51	TCCCANGCCATNCGRTGNCC	1284	1303	1294	1.7656	371
Ref444	Smith DB, Pathirana S, Davidson E Lawlor M, Power J, Yap PL,	The origin of hepatitis C virus genotypes.	1997	J Gen Virol	78			http://vir.sgmjournals.org/content/78/2/321.long		[Ref397] and [Ref403]	Genotyping/classification	ATGGGGTTCTCGTATGATACCCGCTGCTTTGACTC	8244	8278	8262	1.8	GCTCTCAGGTTCCGCTCGTCCTCC	8591	8614	8603	1.7288	371
Ref445	Morsica G, Bagaglio S, Ghezzi S, et al.	Hepatitis C virus (HCV) coinfection in a cohort of HIV positive long-term non-progressors: possible protective effect of infecting HCV genotype on HIV disease progression.	2007	J Clin Virol.	39			http://pdn.sciencedirect.com/science?_ob=MiamiImageURL&_cid=271981&_user=1975841&_pii=S1386653207001023&_check=y&_origin=article&_zone=toolbar&_coverDate=30-Jun-2007&view=c&originContentFamily=serial&wchp=dGLzVlS-zSkzS&md5=9cb4eb2e927348b4002eb9489d923681/1-s2.0-S1386653207001023-main.pdf		[Ref446]	Natural history	GTGCAGCCTCCAGGACCCCC	105	124	115	1.9084	GGGCACTCGCAAGCACCCTAT	296	316	307	1.926	212
Ref447	Simmonds, P., L. Q. Zhang, H. G. Watson, S. Rebus, E. D. Ferguson, P. Balfe, G. H. Leadbetter, P. L. Yap, J. F. Peutherer, and C. A. Ludlam.	Hepatitis C quantification and sequencing in blood products, haemophiliacs, and drug users.	1990	Lancet	336			http://pdn.sciencedirect.com/science?_ob=MiamiImageURL&_cid=271074&_user=1975841&_pii=014067369093179S&_check=y&_origin=article&_zone=toolbar&_coverDate=15-Dec-1990&view=c&originContentFamily=serial&wchp=dGLzVlt-zSkWb&md5=7b5b53e6a7f5783bf6cc4cedae3e6155/1-s2.0-014067369093179S-main.pdf			Natural history	CACCCAGACAGTCGATTTCAG	4715	4735	4726	1.6852	GTATTTGGTGACTGGGTGCGTC	5252	5273	5263	1.65364	559
Ref451	Kato, N., Ikeda, M., Mizutani, T., Sugiyama, K., Noguchi, M., Hirohashi, S., and Shimotohno, K.	Replication of Hepatitis C Virus in Cultured Non-neoplastic Human Hepatocytes	1996	Jpn. J. Cancer Res.	87			http://onlinelibrary.wiley.com/doi/10.1111/j.1349-7006.1996.tb02101.x/pdf			Natural history	TTGGGATATGATGATGAACTGG	1298	1319	1309	1.7116	CTGTTGATGTGCCAGCTGCC	1593	1612	1603	1.4188	315
Ref452	N Kato, Y Ootsuyama, H Sekiya, S Ohkoshi, T Nakazawa, M Hijikata, and K Shimotohno	Genetic drift in hypervariable region 1 of the viral genome in persistent hepatitis C virus infection.	1994	Journal of virology	68			http://jvi.asm.org/content/68/8/4776.full.pdf+html			Natural history	GTGAACTATGCAACAGGGAA	825	844	835	1.474	GCAGCCATCTCCCGGTCCAT	2769	2788	2779	1.8248	1964
Ref457	Laskus T., Wang L. F., Rakela J., Vargas H., Pinna A. D., Tsamandas A. C., Demetris A. J., Fung J.	Dynamic behavior of hepatitis C virus in chronically infected patients receiving liver graft from infected donors.	1996	Virology	220			http://pdn.sciencedirect.com/science?_ob=MiamiImageURL&_cid=272412&_user=1975841&_pii=S0042682296902974&_check=y&_origin=article&_zone=toolbar&_coverDate=01-Jun-1996&view=c&originContentFamily=serial&wchp=dGLbVlt-zSkzk&md5=3be52be97bfd085f2f7cdae5c2624cc2/1-s2.0-S0042682296902974-main.pdf			Genotyping/classification	TGGGGATCCCGTATGATACCCGCTGCTTTGA	8245	8275	8261	1.7908	GGCGGAATTCCTGGTCATAGCCTCCGTGAA	8616	8645	8631	1.5956	401
Ref459	Tanaka Y, Hanada K, Mizokami M, et al.	A comparison of the molecular clock of hepatitis C virus in the United States and Japan predicts that hepatocellular carcinoma incidence in the United States will increase over the next two decades.	2002	Proc Natl Acad Sci U S A	99			http://www.pnas.org/content/99/24/15584.full			Epidemiology	GCACGAATCCTAAACCTCAAAGAAAAAC	346	373	360	1.8204	GAAGCAATAYACYGGRCCACA	1848	1868	1859	1.5684	1523
Ref459	Tanaka Y, Hanada K, Mizokami M, et al.	A comparison of the molecular clock of hepatitis C virus in the United States and Japan predicts that hepatocellular carcinoma incidence in the United States will increase over the next two decades.	2002	Proc Natl Acad Sci U S A	99			http://www.pnas.org/content/99/24/15584.full			Natural history	TGATACCCGCTGYTTTGACTC	8258	8278	8269	1.8316	GTACCTGGTCATAGCCTCCGTG	8618	8639	8629	1.5672	382
Ref460	Chayama K, Tsubota A, Kobayashi M, Okamoto K, Hashimoto M, Miyano Y, Koike H, Kobayashi M, Koida I, Arase Y, Saitoh S, Suzuki Y, Murashima N, Ikeda K, Kumada H.	Pretreatment virus load and multiple amino acid substitutions in the interferon sensitivity-determining region predict the outcome of interferon treatment in patients with chronic hepatitis C virus infection.	1997	Hepatology	25			http://onlinelibrary.wiley.com/doi/10.1002/hep.510250342/pdf			Treatment response/resistance	GGGTCACAGCTCCCATGTGAGCC	6810	6832	6822	1.4824	GAGGGTTGTAATCCGGGCGTGC	7206	7227	7217	1.754	418
Ref461	Ito T, Mukaigawa J, Zuo J, Hirabayashi Y, Mitamura K, Yasui K.	Cultivation of hepatitis C virus in primary hepatocyte culture from patients with chronic hepatitis C results in release of high titre infectious virus.	1996	J Gen Virol	77			http://vir.sgmjournals.org/content/77/5/1043.full.pdf+html			Natural history	GGGGCCCACTGGGGTGTCCT	1389	1408	1399	1.6432	GGGCTCGGAGTGAAGCAATA	1860	1879	1870	1.5284	491
Ref462	Vuillermoz I, Khattab E, Sablon E, Ottevaere I, Vieux C, Trepo C, et al.	Genetic variability of hepatitis C virus in chronically infected patients with viral breakthrough during interferon-ribavirin therapy.	2004	J Med Virol	74			http://onlinelibrary.wiley.com/doi/10.1002/jmv.20144/pdf			Treatment response/resistance		22	49	36	1.8216		910	938	925	1.2548	917
Ref462	Vuillermoz I, Khattab E, Sablon E, Ottevaere I, Vieux C, Trepo C, et al.	Genetic variability of hepatitis C virus in chronically infected patients with viral breakthrough during interferon-ribavirin therapy.	2004	J Med Virol	74			http://onlinelibrary.wiley.com/doi/10.1002/jmv.20144/pdf			Treatment response/resistance		2157	2178	2168	1.4		2418	2440	2430	1.7536	284
Ref462	Vuillermoz I, Khattab E, Sablon E, Ottevaere I, Vieux C, Trepo C, et al.	Genetic variability of hepatitis C virus in chronically infected patients with viral breakthrough during interferon-ribavirin therapy.	2004	J Med Virol	74			http://onlinelibrary.wiley.com/doi/10.1002/jmv.20144/pdf			Treatment response/resistance		6187	6205	6197	1.8384		9323	9343	9334	1.7864	3157
Ref463	McOmish F, Yap PL, Dow BC, Follet EAC, Seed C, Keller AJ, Cobain TJ, Krusius T, Kolho E, Naukkarinen R, Lin C, Lai C, Leong S, Medgyesi GA, Hejjas M, Kiyokawa H, Fukada K, Cuypers T, Saeed AA, Al-Rasheed AM, Lin M, Simmonds P	Geographical distribution of hepatitis C virus genotypes in blood donors: An international collaborative survey.	1994	Journal of Clinical Microbiology	32			http://jcm.asm.org/content/32/4/884.long		[Ref397]	Genotyping/classification	TTCACGCAGAAAGCGTCTAG	63	82	73	1.9576	CACTCTCGAGCACCCTATCAGGCAGT	288	313	301	1.9248	251
Ref465	Yun Z-B, Lindh G , Weiland 0, Johansson B, Sonnerborg A .	Detection of hepatitis C virus (HCV) antibodies in serum and liver histology in Swedish blood donors.	1993	J Med Virol	39			http://onlinelibrary.wiley.com/doi/10.1002/jmv.1890390111/pdf		[Ref398]	Genotyping/classification	GGAACTACTGTCTTCACGCAGA	51	72	62	1.95	TCGCAAGCACCCTATCAGGCAG	289	310	300	1.926	260
Ref466	WEINER, A. J., BRAUER, M. J., ROSENBLATT, J., RICHMAN, K. H., TUNG, J., CRAWFORD, K., BONINO, F., SARACCO, G., CHOO, Q.L., HOUGHTON, M. & HAN, J. H.	Variable and hypervariable domains are found in the regions of HCV corresponding to the flavivirus envelope and NS1 proteins and the pestivirus envelope proteins.	1991	Virology	180			http://www.sciencedirect.com/science/article/pii/004268229190104J			Natural history	GCAATTTGGGTAAGGTCATCGATACCCTTACG	691	722	707	1.4712	AGCCGGTGTTGAGGCTATCATTGCAGTTC	1622	1650	1637	1.876	960
Ref467	Bracho, M. A., García-Robles, I., Jiménez, N., Torres-Puente, M., Moya, A. & González-Candelas, F.	Effect of oligonucleotide primers in determining viral variability within hosts.	2004	Virol J	1			http://www.virologyj.com/content/1/1/13			Clustering/transmission	GGRATATGATGATGAACTGGTC	1300	1321	1311	1.694	GGAGTGAAGCARTATACTGG	1854	1873	1864	1.5528	574
Ref467	Bracho, M. A., García-Robles, I., Jiménez, N., Torres-Puente, M., Moya, A. & González-Candelas, F.	Effect of oligonucleotide primers in determining viral variability within hosts.	2004	Virol J	1			http://www.virologyj.com/content/1/1/13			Clustering/transmission	TAGGTWYGCSCCCCCYTGCA	6734	6753	6744	1.554	CCCTCSAGRGGGGGCAT	7503	7519	7512	1.2296	786
Ref468	Choo QL, Richman KH, Han JH, Berger K, Lee C, Dong C, Gallegos C, Coit D, Medina Selby R, Barr PJ, Weiner AJ, Bradley DW, Kuo G, Houghton M.	Genetic organization and diversity of the hepatitis C virus.	1991	Proc Natl Acad Sci USA	88			http://www.pnas.org/content/88/6/2451.full.pdf+html			Genotyping/classification		23						9401			9379
Ref473	Kato N, Yokosuka O, Omata M, Hosoda K, Ohto M.	Detection of hepatitis C virus ribonucleic acid in the serum by amplification with polymerase chain reaction.	1990	J Clin Invest	86			http://www.ncbi.nlm.nih.gov/pmc/articles/PMC296931/pdf/jcinvest00077-0392.pdf			Natural history	AAGCCCACCCTCCATGGGCC	5184	5203	5194	1.7692	TTTGGTGACTGGGTGCGTCA	5251	5270	5261	1.6708	87
Ref476	Honda M, Kaneko S, Unoura M, Kobayashi K, Murakami S.	Risk of hepatitis C virus infections through household contact with chronic carriers: Analysis of nucleotide sequence.	1993	Hepawlogy	73			http://onlinelibrary.wiley.com/doi/10.1002/hep.1840170605/pdf			Clustering/transmission	GACGAATTCGACGGCGTGAACTACGCAACA	813	839	827	1.404	ATGAGATCTGTGGGAGTGAGCGCTACCCA	1056	1084	1071	1.4172	272
Ref477	Bracho MA, Gosalbes MJ, Blasco D, Moya A, Gonzalez-Candelas F:	Molecular epidemiology of a hepatitis C virus outbreak in a hemodialysis unit.	2005	J Clin Microbiol	43			http://jcm.asm.org/content/43/6/2750.full			Clustering/transmission	CGCATGGCYTGGGAYATGAT	1290	1309	1300	1.7988	GGYGSGTARTGCCARCARTA (or GGGATATGATRATGAAYTGGTC)	1794	1813	1804	1.4224	524
Ref477	Bracho MA, Gosalbes MJ, Blasco D, Moya A, Gonzalez-Candelas F:	Molecular epidemiology of a hepatitis C virus outbreak in a hemodialysis unit.	2005	J Clin Microbiol	43			http://jcm.asm.org/content/43/6/2750.full			Clustering/transmission	TATGATACYCGCTGYTTYGACTC	8256	8278	8268	1.8172	GTACCTRGTCATAGCCTCCGTGAA	8616	8639	8628	1.5672	384
Ref479	Sakamoto M, Akahane Y, Tsuda F, Tanaka T, Woodfield DG, Okamoto H.	Entire nucleotide sequence and characterization of a hepatitis C virus of genotype V/3a. J Gen Virol 1994;75:1761-1768.	1994	J Gen Virol	75			http://vir.sgmjournals.org/content/75/7/1761.full.pdf+html			Genotyping/classification		3						9481			9479
Ref483	Chambers, T.J., X. Fan, D.A. Droll, E. Hembrador, T. Slater, M.W. Nickells, L.B. Dustin, A.M. DiBisceglie,	Quasispecies heterogeneity within the E1/E2 region as a pretreatment variable during pegylated interferon therapy of chronic hepatitis C virus infection,	2005	J. Virol.	79			http://jvi.asm.org/content/79/5/3071.full			Treatment response/resistance	GTACTGAATTCGGTACCGGTTGCTCTTTCTCTATCTTCC	835	873	855	1.396	ACTCGAAGCTTAGATCTTTGATGGTACAAGGRTAATGCC	2188	2227	2208	1.4152	1393
Ref483	Chambers, T.J., X. Fan, D.A. Droll, E. Hembrador, T. Slater, M.W. Nickells, L.B. Dustin, A.M. DiBisceglie,	Quasispecies heterogeneity within the E1/E2 region as a pretreatment variable during pegylated interferon therapy of chronic hepatitis C virus infection,	2005	J. Virol.	79			http://jvi.asm.org/content/79/5/3071.full			Treatment response/resistance	GTACTGAATTCAACTGTTCACCTTCTCTCCCA	1194	1227	1211	1.6896	ACTCGAAGCTTTCGGGACAGCCTGAAGAGTTG	1682	1713	1698	1.5104	520
Ref483	Chambers, T.J., X. Fan, D.A. Droll, E. Hembrador, T. Slater, M.W. Nickells, L.B. Dustin, A.M. DiBisceglie,	Quasispecies heterogeneity within the E1/E2 region as a pretreatment variable during pegylated interferon therapy of chronic hepatitis C virus infection,	2005	J. Virol.	79			http://jvi.asm.org/content/79/5/3071.full			Treatment response/resistance	GTACTGAATTCATCCCTCCCATATAACAGCAG	6861	6891	6877	1.4976	ACTCGAGATCTACAAGCGGATCGAAGGAGTCCA	7099	7131	7116	1.9124	271
Ref484	Aizaki H, Aoki Y, Harada T, Ishii K, Suzuki T, Nagamori S, Toda G, et al. Full-length complementary DNA of hepatitis C virus genome from an infectious blood sample. HEPATOLOGY 1998;27:621-627	Full-length complementary DNA of hepatitis C virus genome from an infectious blood sample.	1998	HEPATOLOGY	27			http://onlinelibrary.wiley.com/doi/10.1002/hep.510270242/pdf			Genotyping/classification	5'Race	1				RNA Linker		9622			9622
Ref485	Chamberlain RW, Adams N, Saeed AA, Simmonds P, Elliott RM.	Complete nucleotide sequence of a type 4 hepatitis C virus variant, the predominant genotype in the Middle East.	1997	J Gen Virol	78			http://vir.sgmjournals.org/content/78/6/1341.full.pdf+html			Genotyping/classification		63						9436			9374
Ref487	Ogata S., Nagano-Fujii M., Ku Y., Yoon S., Hotta H.	Comparative sequence analysis of the core protein and its frameshift product, the F protein, of hepatitis C virus subtype 1b strains obtained from patients with and without hepatocellular carcinoma.	2002	J Clin Microbiol	40	10	3625	http://www.ncbi.nlm.nih.gov/pubmed/12354856	12354856		evolution	ACTGCCTGATAGGGTGCTTG	288	307	298	1.9664	GAGCAGTCGTTCGTGACATGGTA	942	964	954	1.5392	677
Ref492	Inchauspe G, Zebedee S, Lee DH, Sugitani M, Nasoff M, Prince AM.	Genomic structure of the human prototype strain H of hepatitis C virus: comparison with American and Japanese isolates.	1991	Proc Natl Acad SciUSA	88			http://www.pnas.org/content/88/22/10292.full.pdf+html			Genotyping/classification		1						9416			9416
Ref493	Bronowicki JP, Ouzan D, Asselah T, Desmorat H, Zarski JP, et al.	Effect of ribavirin in genotype 1 patients with hepatitis C responding to pegylated interferon alfa-2a plus ribavirin.	2006	Gastroenterology.	131			http://pdn.sciencedirect.com/science?_ob=MiamiImageURL&_cid=273440&_user=1975841&_pii=S0016508506016659&_check=y&_origin=article&_zone=toolbar&_coverDate=31-Oct-2006&view=c&originContentFamily=serial&wchp=dGLbVBA-zSkWA&md5=aac969336d931e2ba9ee78d5a2bc816c/1-s2.0-S0016508506016659-main.pdf			Genotyping/classification	CTGYTTTGACTCCACNGTRAC	8267	8287	8278	1.834	CATAGCCTCCGTGAAGGCTC	8611	8630	8621	1.6928	364
Ref495	Das, M.R., Ali, N., Aruna, B., Rama, D., Nambiar, A., Rehana, Z., Shekhar, M.S., Siddiqui, A., Habibullah, C.M.,	Indian strains of Hepatitis C: prevalence and detection.	1993	Curr. Sci.	65			http://cs-test.ias.ac.in/cs/Downloads/article_28749.pdf			Genotyping/classification	ACTGCTAGCCGACTAGTGTTGGGT	246	269	258	1.9424	AGGTTGCGACCGCTCGGAAGTCTT	492	515	504	1.882	270
Ref496	Cantaloube JF, Gallian P, Attoui H, Biagini P, De Micco P, de Lamballerie X.	Genotype distribution and molecular epidemiology of hepatitis C virus in blood donors from southeast France.	2005	J Clin Microbiol	43			http://jcm.asm.org/content/43/8/3624.full		[Ref497]	Epidemiology	TACCATGTCACSAAYGAYTGC	942	962	953	1.5692	AKGTGCCARCTGCCRTTGGTGTT	1584	1606	1596	1.3812	665
Ref496	Cantaloube JF, Gallian P, Attoui H, Biagini P, De Micco P, de Lamballerie X.	Genotype distribution and molecular epidemiology of hepatitis C virus in blood donors from southeast France.	2005	J Clin Microbiol	43			http://jcm.asm.org/content/43/8/3624.full		[Ref497]	Genotyping/classification	TATGAYACCCGYTGCTTTGAC	8256	8276	8267	1.8292	GAATACCTGGTCATAGCCTCCG	8620	8641	8631	1.5956	386
Ref497	Cantaloube, J.-F., H. Venault, J.-P. Zappitelli, P. Gallian, M. Touinssi, H. Attoui, P. Biagini, X. de Lamballerie, and P. de Micco.	Molecular analysis of HCV type 1 to 5 envelope gene: application to investigations of posttransfusion transmission of HCV.	2000	Transfusion	40			http://onlinelibrary.wiley.com/doi/10.1046/j.1537-2995.2000.40060712.x/full			Clustering/transmission	CCTCTAYRTSCTYACCAACGACTG	938	961	950	1.5596	CTTGGCCCAGTTGCCYTGCATRGA	1428	1451	1440	1.8136	514
Ref497	Cantaloube, J.-F., H. Venault, J.-P. Zappitelli, P. Gallian, M. Touinssi, H. Attoui, P. Biagini, X. de Lamballerie, and P. de Micco.	Molecular analysis of HCV type 1 to 5 envelope gene: application to investigations of posttransfusion transmission of HCV.	2000	Transfusion	40			http://onlinelibrary.wiley.com/doi/10.1046/j.1537-2995.2000.40060712.x/full			Clustering/transmission	TCTATCATRTCACCAAYGAYTGYCC	940	964	953	1.5692	CTCCAGTTCATCATCATGTCCCA	1299	1321	1311	1.694	382
Ref497	Cantaloube, J.-F., H. Venault, J.-P. Zappitelli, P. Gallian, M. Touinssi, H. Attoui, P. Biagini, X. de Lamballerie, and P. de Micco.	Molecular analysis of HCV type 1 to 5 envelope gene: application to investigations of posttransfusion transmission of HCV.	2000	Transfusion	40			http://onlinelibrary.wiley.com/doi/10.1046/j.1537-2995.2000.40060712.x/full			Genotyping/classification	TACCATGTCACSAAYGAYTGC	942	962	953	1.5692	AKGTGCCARCTGCCRTTGGTGTT	1584	1606	1596	1.3812	665
Ref497	Cantaloube, J.-F., H. Venault, J.-P. Zappitelli, P. Gallian, M. Touinssi, H. Attoui, P. Biagini, X. de Lamballerie, and P. de Micco.	Molecular analysis of HCV type 1 to 5 envelope gene: application to investigations of posttransfusion transmission of HCV.	2000	Transfusion	40			http://onlinelibrary.wiley.com/doi/10.1046/j.1537-2995.2000.40060712.x/full			Clustering/transmission	GCAGTGCTCCAYAYTCCTGGATG	996	1018	1008	1.6408	GACYTTCGCCCACGCTCCYTGC	1434	1454	1445	1.7828	459
Ref498	Silini, E., F. Bono, A. Cividini, A. Cerino, S. Bruno, S. Rossi, G. Belloni, B. Brugnetti, E. Civardi, L. Salvaneschi, and M. U. Mondelli.	Differential distribution of hepatitis C virus genotypes in patients with and without liver function abnormalities.	1995	Hepatology	21			http://onlinelibrary.wiley.com/doi/10.1002/hep.1840210204/pdf		Modified [Ref236]	Genotyping/classification	TAGATTGGGTGTGCGCGCGA	467	486	477	1.92208	AGGTTCCCTGTTGCATAATT	828	847	838	1.452	381
Ref499	Castillo I, Pardo M, Bartolomé J, et al.	Occult hepatitis C virus infection in patients in whom the etiology of persistently abnormal results of liver‐function tests is unknown.	2004	J Infect Dis	189			http://jid.oxfordjournals.org/content/189/1/7.full.pdf+html			Natural history	TSYTGCCGCGCAGGGGC	448	464	457	1.8964	GTACCCCATGAGRTCGGC	732	749	741	1.592	302
Ref502	Beld M, Penning M, McMorrow M, Gorgels J, van den Hoek A, Goudsmit J.	Different hepatitis C virus (HCV) RNA load profiles following seroconversion among injecting drug users without correlation with HCV genotype and serum alanine aminotransferase levels.	1998	J Clin Microbiol	36			http://jcm.asm.org/content/36/4/872.full			Genotyping/classification	AGCGCCTAGCCATGGCGT	74	91	83	1.9496	TACCACAAGGCCTTTCGC	271	288	280	1.9456	215
Ref503	Allander T, Medin C, Kacobson SH, Grillner L, Persson MAA.	Hepatitis C transmission in a hemodialysis unit: molecular evidence for spread of virus among patients not sharing equipment.	1994	J Med Virol	43			http://onlinelibrary.wiley.com/doi/10.1002/jmv.1890430417/pdf		[Ref424]	Clustering/transmission	GGGACATGATGATCAACTGG	1300	1319	1310	1.7108	GBGAAGGAATTCACTGGGCCACA	1848	1870	1860	1.5648	571
Ref507	Idrees M, Riazuddin S:	Frequency distribution of hepatitis C virus genotypes in different geographical regions of Pakistan and their possible routes of transmission.	2008	BMC Infect Dis	8			http://www.ncbi.nlm.nih.gov/pmc/articles/PMC2409346/#B24		[Ref126]	Genotyping/classification	TTGTGGTACTGCCTGATAGGG	281	301	292	1.9572	GGATGTACCCCATGAGGTCG	734	753	744	1.5304	473
Ref508	Apichartpiyakul, C., C. Chittivudikarn, H. Miyajima, M. Homma, and H. Hotta.	Analysis of hepatitis C virus isolates among healthy blood donors and drug addicts in Chiang Mai, Thailand.	1994	J. Clin. Microbiol.	32			http://jcm.asm.org/content/32/9/2276.long			Genotyping/classification	TTTGACTCAACCGTCACTGA	8271	8290	8281	1.8328	TAGCACGTCATGGTGTTTCCCAT	8465	8488	8477	1.5684	218
Ref509	Hotta, H., H. Doi, T. Hayashi, M. Purwanta, W. Soemarto, M. Mizokami, K. Ohba, and M. Homma.	Analysis of the core and E1 envelope region sequences of a novel variant of hepatitis C virus obtained in Indonesia.	1994	Arch. Virol.	136			http://www.springerlink.com/content/j8n2727838127u62/fulltext.pdf			Epidemiology	ACTGCCTGATAGGGTGCTTG	288	307	298	1.9664	AAGGGTATCGATGACCTTAC	700	719	710	1.5152	432
Ref509	Hotta, H., H. Doi, T. Hayashi, M. Purwanta, W. Soemarto, M. Mizokami, K. Ohba, and M. Homma.	Analysis of the core and E1 envelope region sequences of a novel variant of hepatitis C virus obtained in Indonesia.	1994	Arch. Virol.	136			http://www.springerlink.com/content/j8n2727838127u62/fulltext.pdf			Epidemiology	TTGCTCTTTCTCTATCTTCC	854	874	865	1.4068	GACCAGTTCATCATCATATC	1302	1321	1312	1.7488	468
Ref510	Hotta, H., R. Handajani, M. I. Lusida, W. Soemarto, H. Doi, H. Miyajima, and M. Homma.	Subtype analysis of hepatitis C virus in Indonesia on the basis of NS5b region sequences.	1994	J. Clin. Microbiol.	32			http://www.ncbi.nlm.nih.gov/pmc/articles/PMC264225/pdf/jcm00012-0179.pdf		[Ref072], [Ref488], [Ref509]	Epidemiology	TTGCTCTTTCTCTATCTTCC	854	874	865	1.4068	GACCAGTTCATCATCATATC	1302	1321	1312	1.7488	468
Ref510	Hotta, H., R. Handajani, M. I. Lusida, W. Soemarto, H. Doi, H. Miyajima, and M. Homma.	Subtype analysis of hepatitis C virus in Indonesia on the basis of NS5b region sequences.	1994	J. Clin. Microbiol.	32			http://www.ncbi.nlm.nih.gov/pmc/articles/PMC264225/pdf/jcm00012-0179.pdf		[Ref072], [Ref488], [Ref509]	Epidemiology	TTTGACTCAACCGTCACTGA	8271	8290	8281	1.8328	CTCAGGCTCGCCGCATCCTC	8592	8611	8602	1.7228	341
Ref511	Polyak, Stephen J., Susan McArdle, Shan-Lu Liu, Daniel G. Sullivan, Minjun Chung, Wolfgang T. Hofgärtner, Robert L. Carithers Jr., Brian J. McMahon, James I. Mullins, Lawrence Corey, and David R. Gretch	Evolution of Hepatitis C Virus Quasispecies in Hypervariable Region 1 and the Putative Interferon Sensitivity-Determining Region during Interferon Therapy and Natural Infection	1998	J. Virol.	72	5	4288	http://jvi.asm.org/content/72/5/4288.full		[Ref419]	evolution	GCAATTTGGGTAAGGTCATCGATACCCTTACG	691	722	707	1.4712	AGCCGGTGTTGAGGCTATCATTGCAGTTC	1622	1650	1637	1.876	960
Ref511	Polyak, Stephen J., Susan McArdle, Shan-Lu Liu, Daniel G. Sullivan, Minjun Chung, Wolfgang T. Hofgärtner, Robert L. Carithers Jr., Brian J. McMahon, James I. Mullins, Lawrence Corey, and David R. Gretch	Evolution of Hepatitis C Virus Quasispecies in Hypervariable Region 1 and the Putative Interferon Sensitivity-Determining Region during Interferon Therapy and Natural Infection	1998	J. Virol.	72	5	4288	http://jvi.asm.org/content/72/5/4288.full		[Ref419]	evolution	CCTCCCATATAACAGCAGAG	6874	6893	6884	1.5072	CGAAGGAGTCCAGAATCACC	7091	7110	7101	1.8444	237
Ref512	Kato, N., Nakazawa, T., Mizutani, T., Shimotohno, K.	Susceptibility of Human T-Lymphotropic Virus type I infected cell line MT-2 to Hepatitis C Virus infection	1995	Biochem Biophys Res Commun	206		863	http://ac.els-cdn.com/S0006291X85711230/1-s2.0-S0006291X85711230-main.pdf?_tid=e678ff55cad7c142d8ea3b4bd3cb6e62&acdnat=1332219395_b88278897f92d1b8750ec5dd425954c6			Natural history	AGAGCCATAGTGGTCTGCGG	134	153	144	1.954	CTTTCGCGACCCAACACTAC	258	277	268	1.932	144
Ref514	Vallet S., Viron F., Henquell C., Le Guillou-Guillemette H., Lagathu G., Abravanel F., Trimoulet P., Soussan P., Schvoerer E., Rosenberg A., Gouriou S., Colson P., Izopet J., Payan C.	NS3 protease polymorphism and natural resistance to protease inhibitors in French patients infected with HCV genotypes 1-5	2011	Antiviral Therapy	16	7	1093	http://www.scopus.com/inward/record.url?eid=2-s2.0-80055075318&partnerID=40&md5=40697a3163e46831d2be267d8bdfbb7e	22024525	http://www.intmedpress.com/serveFile.cfm?sUID=029ad6fd-fd35-43b1-806a-aefca93e6b63	treatment response	ATCTTGCTCGGGCCGGCCGA	3369	3388	3379	1.82	GCGACCTGRTAGGTCTGRGGCA	3997	4018	4008	1.74	650
Ref518	Qiu P., Sanfiorenzo V., Curry S., Guo Z., Liu S., Skelton A., Xia E., Cullen C., Ralston R., Greene J., Tong X.	Identification of HCV protease inhibitor resistance mutations by selection pressure-based method	2009	Nucleic Acids Research	37	10		http://www.scopus.com/inward/record.url?eid=2-s2.0-67249111663&partnerID=40&md5=bc43455dfb025a9de13208468bc68db1		http://www.torna.do/s/Identification-of-HCV-protease-inhibitor-resistance-mutations-by-selection-pressure-based-method/	treatment response	GTAGAGCCCGTCGTCTTCTC	3252	3271	3262	1.74	GTGCTCTTGCCGCTGCCAGT	4035	4054	4045	1.76	803
Ref520	Curry S., Qiu P., Tong X.	Analysis of HCV resistance mutations during combination therapy with protease inhibitor boceprevir and PEG-IFN Î±-2b using TaqMan mismatch amplification mutation assay	2008	Journal of Virological Methods	153	2	156	http://www.scopus.com/inward/record.url?eid=2-s2.0-53049089301&partnerID=40&md5=a6d7880b035b27c263f3045ca1aa24f6	18755220	http://www.ncbi.nlm.nih.gov/pubmed/14518724	treatment response	GACATCATCTTGGGTCTGCCCGTCTC	3324	3349	3367	1.84	GTGGGAGCGTGTAGGTGGGC	4017	4036	4027	1.77	713
Ref521	Colson P., Brouk N., Lembo F., Castellani P., Tamalet C., Gerolami R.	Natural presence of substitution R155K within hepatitis C virus NS3 protease from a treatment-naÃ¯ve chronically infected patient	2008	Hepatology	47	2	766	http://www.scopus.com/inward/record.url?eid=2-s2.0-39549123821&partnerID=40&md5=5f877f900dd55d4be8833e325b6a9b3b	18220300	http://onlinelibrary.wiley.com/doi/10.1002/hep.22122/full	treatment response	ATCACsTGGGGrGCrGAyAC	3291	3310	3301	1.73	GTGCTCTTrCCGCTrCCrGT	4035	4054	4045	1.76	764
Ref526	Khattab E., Chemin I., Vuillermoz I., Vieux C., Mrani S., Guillaud O., Trepo C., Zoulim F.	Analysis of HCV co-infection with occult hepatitis B virus in patients undergoing IFN therapy	2005	Journal of Clinical Virology	33	2	150	http://www.scopus.com/inward/record.url?eid=2-s2.0-19444379055&partnerID=40&md5=92fabab3d7e291ee1a2069327000240f	15911431	Ref462	treatment response		342	376	359	1.82		910	938	924	1.24	563
Ref529	Thelu M.-A., Drouet E., Hilleret M.-N., Zarski J.-P.	Lack of Clinical Significance of Variability in the Internal Ribosome Entry Site of Hepatitis C Virus	2004	Journal of Medical Virology	72	3	396	http://www.scopus.com/inward/record.url?eid=2-s2.0-1642539185&partnerID=40&md5=63f8d1815b13a26daeebf54e9a13e06e	14748063	http://onlinelibrary.wiley.com/doi/10.1002/jmv.20021/pdf	treatment response	gacactccaccatgaatcac	21	40	31	1.8	gtttttctttgaggtttagg	354	373	364	1.83	353
Ref532	Young K.-C., Lindsay K.L., Lee K.-J., Liu W.-C., He J.-W., Milstein S.L., Lai M.M.C.	Identification of a ribavirin-resistant NS5B mutation of hepatitis C virus during ribavirin monotherapy	2003	Hepatology	38	4	869	http://www.scopus.com/inward/record.url?eid=2-s2.0-0141755411&partnerID=40&md5=8e0f8aa4097bec87f134f0a83b4ac499	14512874	http://onlinelibrary.wiley.com/doi/10.1002/hep.1840380413/pdf	treatment response	GAGAGCGACATCCGTACGGAGGAG	8289	8312	8301	1.77	AAAAAAAAAAAACAGGAAATGGCTTAAG	9402	9429	9416	1.78	1141
Ref533	Watanabe H., Nagayama K., Enomoto N., Itakura J., Tanabe Y., Hamano K., Izumi N., Sato C., Watanabe M.	Sequence elements correlating with circulating viral load in genotype 1b hepatitis C virus infection	2003	Virology	311	2	376	http://www.scopus.com/inward/record.url?eid=2-s2.0-0038045756&partnerID=40&md5=d1add271cb62c5deca6658c601104249	12842626	Ref402	treatment response	5'Race	13				3'Race		9427	4714	1.62	9415
Ref534	Saito T., Ito T., Ishiko H., Yonaha M., Morikawa K., Miyokawa A., Mitamura K.	Sequence analysis of PePHD within HCV E2 region and correlation with resistance of interferon therapy in Japanese patients infected with HCV genotypes 2a and 2b	2003	American Journal of Gastroenterology	98	6	1377	http://www.scopus.com/inward/record.url?eid=2-s2.0-0038649813&partnerID=40&md5=ef0a1459404f6282517ad464fbd48c4f	12818284	http://www.nature.com/ajg/journal/v98/n6/full/ajg2003317a.html	treatment response	CTTTGGCACTAYCCYTGYAC	2184	2203	2194	1.41	CACRATGTTCTGRTGGAGRT	2413	2432	2423	1.77	249
Ref534	Saito T., Ito T., Ishiko H., Yonaha M., Morikawa K., Miyokawa A., Mitamura K.	Sequence analysis of PePHD within HCV E2 region and correlation with resistance of interferon therapy in Japanese patients infected with HCV genotypes 2a and 2b	2003	American Journal of Gastroenterology	98	6	1377	http://www.scopus.com/inward/record.url?eid=2-s2.0-0038649813&partnerID=40&md5=ef0a1459404f6282517ad464fbd48c4f	12818284	http://www.nature.com/ajg/journal/v98/n6/full/ajg2003317a.html	treatment response	CAGGTACGCTCCGGCGTGCA	4948	4968	4958	1.71	GGGGCCTTGGTAGGTGGCAA	7287	7305	7296	1.79	2358
Ref539	Gimenez-Barcons M., Franco S., Suarez Y., Forns X., Ampurdanes S., Puig-Basagoiti F., Sanchez-Fueyo A., Barrera J.-M., Llovet J.-M., Bruix J., Sanchez-Tapias J.-M., Rodes J., Saiz J.-C.	High amino acid variability within the NS5A of hepatitis C virus (HCV) is associated with hepatocellular carcinoma in patients with HCV-1b-related cirrhosis	2001	Hepatology	34	1	158	http://www.scopus.com/inward/record.url?eid=2-s2.0-0034961822&partnerID=40&md5=6540dba900fef2b9edf7e2b6c65eac44	11431747	www.onlinelibrary.wiley.com/doi/10.1053/jhep.2001.25512/pdf	treatment response	GGG AGG TCT CGT AGA CCG TGC A	318	339	329	1.92	ATG TAC CCC ATG AGG TCG GC	732	751	742	1.56	434
Ref539	Gimenez-Barcons M., Franco S., Suarez Y., Forns X., Ampurdanes S., Puig-Basagoiti F., Sanchez-Fueyo A., Barrera J.-M., Llovet J.-M., Bruix J., Sanchez-Tapias J.-M., Rodes J., Saiz J.-C.	High amino acid variability within the NS5A of hepatitis C virus (HCV) is associated with hepatocellular carcinoma in patients with HCV-1b-related cirrhosis	2001	Hepatology	34	1	158	http://www.scopus.com/inward/record.url?eid=2-s2.0-0034961822&partnerID=40&md5=6540dba900fef2b9edf7e2b6c65eac44	11431747	www.onlinelibrary.wiley.com/doi/10.1053/jhep.2001.25512/pdf	treatment response	ATG GTG GGT ACC TGG GCT AAG GT	1431	1453	1442	1.81	GGT CTA GAT GCG TAG TGC CAG CA	1797	1819	1808	1.38	389
Ref539	Gimenez-Barcons M., Franco S., Suarez Y., Forns X., Ampurdanes S., Puig-Basagoiti F., Sanchez-Fueyo A., Barrera J.-M., Llovet J.-M., Bruix J., Sanchez-Tapias J.-M., Rodes J., Saiz J.-C.	High amino acid variability within the NS5A of hepatitis C virus (HCV) is associated with hepatocellular carcinoma in patients with HCV-1b-related cirrhosis	2001	Hepatology	34	1	158	http://www.scopus.com/inward/record.url?eid=2-s2.0-0034961822&partnerID=40&md5=6540dba900fef2b9edf7e2b6c65eac44	11431747	www.onlinelibrary.wiley.com/doi/10.1053/jhep.2001.25512/pdf	treatment response	AAG GTT AGG ATG TAT GTG GG	2223	2242	2233	1.51	ATT GAG GAC CAC CAG GTT CT	2587	2606	2597	1.79	384
Ref539	Gimenez-Barcons M., Franco S., Suarez Y., Forns X., Ampurdanes S., Puig-Basagoiti F., Sanchez-Fueyo A., Barrera J.-M., Llovet J.-M., Bruix J., Sanchez-Tapias J.-M., Rodes J., Saiz J.-C.	High amino acid variability within the NS5A of hepatitis C virus (HCV) is associated with hepatocellular carcinoma in patients with HCV-1b-related cirrhosis	2001	Hepatology	34	1	158	http://www.scopus.com/inward/record.url?eid=2-s2.0-0034961822&partnerID=40&md5=6540dba900fef2b9edf7e2b6c65eac44	11431747	www.onlinelibrary.wiley.com/doi/10.1053/jhep.2001.25512/pdf	treatment response	CAC ATG CAT GTC ATG ATG TA	4632	4651	4642	1.41	GAT GTC GTT GTC GTG GCA AC-	5271	5290	5281	1.77	659
Ref539	Gimenez-Barcons M., Franco S., Suarez Y., Forns X., Ampurdanes S., Puig-Basagoiti F., Sanchez-Fueyo A., Barrera J.-M., Llovet J.-M., Bruix J., Sanchez-Tapias J.-M., Rodes J., Saiz J.-C.	High amino acid variability within the NS5A of hepatitis C virus (HCV) is associated with hepatocellular carcinoma in patients with HCV-1b-related cirrhosis	2001	Hepatology	34	1	158	http://www.scopus.com/inward/record.url?eid=2-s2.0-0034961822&partnerID=40&md5=6540dba900fef2b9edf7e2b6c65eac44	11431747	www.onlinelibrary.wiley.com/doi/10.1053/jhep.2001.25512/pdf	treatment response	TGG ATG GAG TGC GGT TGC ACA GGT A	6715	6739	6727	1.51	GGG GCC CTG GTA GGT GGC AA	7287	7306	7297	1.75	592
Ref540	Lo S.-Y., Lin H.H.	Variations within hepatitis C virus E2 protein and response to interferon treatment	2001	Virus Research	75	2	107	http://www.scopus.com/inward/record.url?eid=2-s2.0-0035013382&partnerID=40&md5=d2b3e163578ad93fa7ae2abc87b7b8f3	11325465	http://www.sciencedirect.com/science/article/pii/S0168170201002246	treatment response	GGTCTGCCCCACGGATTG	2078	2095	2087	1.34	CCACAAGCAGGCACAGAC	2532	2549	2541	1.69	472
Ref541	Nishiguchi S., Ueda T., Itoh T., Enomoto M., Tanaka M., Tatsumi N., Fukuda K., Tamori A., Habu D., Takeda T., Otani S., Shiomi S.	Method to detect substitutions in the interferon-sensitivity-determining region of hepatitis C virus 1b for prediction of response to interferon therapy	2001	Hepatology	33	1	241	http://www.scopus.com/inward/record.url?eid=2-s2.0-0035196527&partnerID=40&md5=49f7f148cca1cbcad00c2f9e445266b0	11124842	http://onlinelibrary.wiley.com/doi/10.1053/jhep.2001.20795/pdf	treatment response	CCCTCCTTGGCCAGCT	6926	6942	6934	1.73	TTTCCGCAGGATCTCCGC	7155	7175	7165	1.79	250
Ref542	Bellobuono A., Mondazzi L., Tempini S., Chiodo F., Magliano E., Furione L., Ideo G.	Early addition of ribavirin to interferon in chronic hepatitis C not responsive to interferon monotherapy	2000	Journal of Hepatology	33	3	463	http://www.scopus.com/inward/record.url?eid=2-s2.0-0033836854&partnerID=40&md5=ad24dc427a275dd2069933908638f3d4	11020003	Ref498	treatment response	TAGATTGGGTGTGCGCGCGA	467	486	477	1.92	AGGTTCCCTGTTGCATAATT	828	847	838	1.45	362
Ref543	Frangeul L., Cresta P., Perrin M., Lunel F., Opolon P., Agut H., Huraux J.-M.	Mutations in NS5A region of hepatitis C virus genome correlate with presence of NS5A antibodies and response to interferon therapy for most common European hepatitis C virus genotypes	1998	Hepatology	28	6	1674	http://www.scopus.com/inward/record.url?eid=2-s2.0-0031793049&partnerID=40&md5=68078b005c96eee2f6d9025b9ba61173	9828234	http://onlinelibrary.wiley.com/doi/10.1002/hep.510280630/pdf	treatment response	ATGCYGAGCTCATAGARGCYAACCT	7009	7033	7021	1.77	GCATGGARGAATAGGACTCARCGTC	7482	7506	7494	1.37	498
Ref543	Frangeul L., Cresta P., Perrin M., Lunel F., Opolon P., Agut H., Huraux J.-M.	Mutations in NS5A region of hepatitis C virus genome correlate with presence of NS5A antibodies and response to interferon therapy for most common European hepatitis C virus genotypes	1998	Hepatology	28	6	1674	http://www.scopus.com/inward/record.url?eid=2-s2.0-0031793049&partnerID=40&md5=68078b005c96eee2f6d9025b9ba61173	9828234	http://onlinelibrary.wiley.com/doi/10.1002/hep.510280630/pdf	treatment response	TTCCTGCGCCGAACTAYAMGTTCGC	6559	6583	6571	1.7	CYGCCACAAGCGGATCGAAGGAGTC	7101	7125	7113	1.91	567
Ref549	Lodrini S, Bagaglio S, Canducci F, De Mitri MS, Andreone P, Loggi E, Lazzarin A, Clementi M, Morsica G	Sequence analysis of NS3 protease gene in clinical strains of hepatitis C virus.	2003	J Biol Regul Homeost Agents	17	2	198	http://www.ncbi.nlm.nih.gov/pubmed/14518724	14518724		treatment response	GACATCATCTTGGGTCTGCCCGTCTC	3324	3349	3337	1.77	GTGGGAGCGTGTAGGTGGGC	4017	4036	4027	1.77	713
